# Supplementary material for: Discovery of 3,6-disubstituted pyridazines as a novel class of anticancer agents targeting cyclin-dependent kinase 2: synthesis, biological evaluation and in silico insights
Source: PubMed Central journal article supplement (PMC7470104; doi:10.1080/14756366.2020.1806259), 2020-08-11

## Supporting Information

### **Discovery of 3,6-Disubstituted Pyridazines as a Novel Class of Anticancer Agents Targeting Cyclin-Dependent Kinase 2: Synthesis, Biological Evaluation and In Silico Insights**

Ahmed Sabt, Wagdy M. Eldehna<sup>\*</sup>, Tarfah Al-Warhi, Ohoud J. Alotaibi, Mahmoud M. Elaasser, Howayda Suliman, Hatem A. Abdel-Aziz

## Tables of Contents

|    |                                                                                                             |       |
|----|-------------------------------------------------------------------------------------------------------------|-------|
| 1. | Characterization of intermediate ( <b>2, 3, 4, 5, 6</b> and <b>13</b> ) and target pyridazines <b>11a-r</b> | 3     |
| 2. | Anti-proliferative Activity                                                                                 | 11    |
| 3. | Cell Cycle Analysis                                                                                         | 11    |
| 4. | AnnexinV-FITC/PI Apoptosis Assay                                                                            | 12    |
| 5. | CDK Kinase Inhibitory Activity Statistical Analysis                                                         | 12    |
| 6. | Statistical Analysis                                                                                        | 12    |
| 7. | Figure S1. Different target classes suggested by SwissTargetPrediction online tool                          | 13    |
| 8. | Table S1. Different targets suggested by SwissTargetPrediction online tool                                  | 14-18 |
| 9. | NMR Spectra                                                                                                 | 19-68 |

## 1. Characterization of intermediate (2, 3, 4, 5, 6 and 13) and target pyridazines 11a-r

### Ethyl 2-hydroxy-4-oxo-2-(trifluoromethyl)pentanoate (2)

Yellow oil;  $^1\text{H}$  NMR ( $\text{CDCl}_3$ , 400 MHz)  $\delta$  ppm: 1.20 (t, 3H,  $J = 7.2$  Hz,  $\text{CH}_3$ ), 2.11 (s, 3H,  $\text{CH}_3$ ), 3.03 (q, 2H,  $J = 17.6$  Hz,  $\text{OCH}_2$ ), 4.19 (brs, 1H, OH), Ha 4.24 (d, 1H,  $J = 2.4$  Hz), Hb 4.26 (d, 1H,  $J = 2.4$  Hz).

### 6-Methyl-4-(trifluoromethyl)pyridazin-3(2H)-one (3)

White crystals (0.27 g, 69%); m.p. 184-185 °C (reported m.p. 187-189 °C [32]);  $^1\text{H}$  NMR ( $\text{CDCl}_3$ , 400 MHz)  $\delta$  ppm: 2.42 (s, 3H,  $\text{CH}_3$ ), 7.49 (s, 1H, CH), 12.44 (brs, 1H, NH);  $^{13}\text{C}$  NMR ( $\text{CDCl}_3$ , 100 MHz)  $\delta$  ppm: 20.67 ( $\text{CH}_3$ ), 116.92 (q,  $J_{\text{C,F}} = 271.4$  Hz,  $\text{CF}_3$ ), 128.90 (q,  $J_{\text{C,F}} = 32.7$  Hz, C4), 132.38 (q,  $J_{\text{C,F}} = 4.6$  Hz, C5), 144.69 (C=N), 157.58 (C=O);  $^{19}\text{F}$  NMR ( $\text{CDCl}_3$ , 376 MHz)  $\delta$  ppm: 67.33 (s, 3F).

### 6-Oxo-5-(trifluoromethyl)-1,6-dihydropyridazine-3-carboxylic acid (4)

White crystals (0.06 g, 54%); m.p. 239-240 °C;  $^1\text{H}$  NMR ( $\text{DMSO-}d_6$ , 400 MHz)  $\delta$  ppm: 3.17 (brs, 1H, NH), 8.20 (s, 1H, CH-pyridazinone), 14.18 (s, 1H, COOH); Analysis for  $\text{C}_6\text{H}_3\text{F}_3\text{N}_2\text{O}_3$  (208), Calcd.: % C, 34.63; H, 1.45; N, 13.46; Found: C, 34.51; H, 1.47; N, 13.52.

### Ethyl 6-oxo-5-(trifluoromethyl)-1,6-dihydropyridazine-3-carboxylate (5)

White solid (3.0 g, 90%); m.p. 147-148 °C;  $^1\text{H}$  NMR ( $\text{CDCl}_3$ , 400 MHz)  $\delta$  ppm: 1.35 (t, 3H,  $J = 6.8$  Hz,  $\text{CH}_3$ ), 4.39 (q, 2H,  $J = 7.2$  Hz,  $\text{CH}_2$ ), 7.9 (brs, 1H, NH), 8.18 (s, 1H, CH-pyridazine), 12.26 (brs, 1H, NH); Analysis for  $\text{C}_8\text{H}_7\text{F}_3\text{N}_2\text{O}_3$  (236), Calcd.: % C, 40.69; H, 2.99; N, 11.86; Found: C, 40.56; H, 3.00; N, 11.91.

### Ethyl 6-chloro-5-(trifluoromethyl) pyridazine-3-carboxylate (6)

Yellow liquid (1.1 g, 51%);  $^1\text{H}$  NMR ( $\text{CDCl}_3$ , 400 MHz)  $\delta$  ppm: 1.49 (t, 3H,  $J = 7.2$  Hz,  $\text{CH}_3$ ), 4.57 (q, 2H,  $J = 7.2$  Hz,  $\text{OCH}_2$ ), 8.44 (s, 1H, CH-pyridazine);  $^{13}\text{C}$  NMR ( $\text{CDCl}_3$ , 100 MHz)  $\delta$  ppm: 14.09 ( $\text{CH}_3$ ), 63.42 ( $\text{OCH}_2$ ), 116.59 (q,  $J_{\text{C,F}} = 273$  Hz,  $\text{CF}_3$ ), 126.31 (q,  $J_{\text{C,F}}$ )

= 4.7 Hz, C4), 128.86 (q,  $J_{(C,F)} = 35.6$  Hz, C5), 151.45 (C=N), 154.95 (C-Cl), 162.16 (C=O); Analysis for  $C_8H_6ClF_3N_2O_2$  (254), Calcd.: C, 37.74; H, 2.38; N, 11.00; Found: C, 37.82; H, 2.36; N, 10.95.

### **Ethyl 6-morpholino-5-(trifluoromethyl)pyridazine-3-carboxylate (13)**

Yellow oil (0.0476 g, 70%);  $^1H$  NMR ( $CDCl_3$ , 400 MHz)  $\delta$  ppm: 1.37 (t, 3H,  $J = 7.2$  Hz,  $CH_3$ ), 3.68 (t, 4H,  $J = 4.4$  Hz,  $2 \times CH_2-N$ ), 3.78 (t, 4H,  $J = 5.2$  Hz,  $2 \times CH_2-O$ ), 4.41 (q, 2H,  $J = 7.2$  Hz,  $OCH_2$ ), 8.11 (s, 1H, CH-pyridazine); Analysis for  $C_{12}H_{14}F_3N_3O_3$  (305), Calcd.: C, 47.22; H, 4.62; N, 13.77; Found: C, 47.40; H, 4.59; N, 13.93.

### **Target pyridazine derivatives (11a-r)**

N-(Adamantan-2-yl)-6-((2-hydroxyethyl)amino)-5-(trifluoromethyl)pyridazine-3-carboxamide (11a)

Pale yellow crystals; Yield (63%); m.p. 202-203 °C;  $^1H$  NMR ( $CDCl_3$ , 400 MHz)  $\delta$  ppm: 1.59 (d,  $J = 12.8$  Hz, 2H), 1.70 (s, 2H), 1.83 (s, 6H), 1.86 (d,  $J = 13.6$  Hz, 2H), 1.96 (brs, 2H), 2.60 (brs, 1H, OH), 3.83 (t, 2H,  $J = 5.2$  Hz,  $CH_2-NH$ ), 3.87 (t, 2H,  $J = 4.8$  Hz,  $CH_2-OH$ ), 4.17 (d, 1H,  $J = 8.4$  Hz, 1H-adamantyl), 5.71 (brs, 1H, NH), 8.14 (s, 1H, CH-pyridazine), 8.18 (d, 1H,  $J = 8.4$  Hz, NH);  $^{13}C$  NMR ( $CDCl_3$ , 100 MHz)  $\delta$  ppm: 26.10, 26.20, 30.85 (2xC), 31.07 (2xC), 36.10 (2xC), 36.49, 43.45 ( $CH_2-NH$ ), 52.54 (NH-C-adamantyl), 60.23 ( $CH_2-OH$ ), 113.20 (q,  $J_{(C,F)} = 33.7$  Hz, C5), 117.56 (q,  $J_{(C,F)} = 272$  Hz,  $CF_3$ ), 122.67 (q,  $J_{(C,F)} = 5.0$  Hz, C4), 144.37 (C=N), 153.84 (C=O), 160.22 (-N-C=N); Analysis for  $C_{18}H_{23}F_3N_4O_2$  (384), Calcd.: C, 56.24; H, 6.03; N, 14.58; Found: C, 56.47; H, 5.98; N, 14.64.

N-(Adamantan-2-yl)-6-(butylamino)-5-(trifluoromethyl)pyridazine-3-carboxamide (11b)

Yellow solid; Yield (72%); m.p. 110-111 °C;  $^1H$  NMR ( $CDCl_3$ , 400 MHz)  $\delta$  ppm: 0.89 (t, 3H,  $J = 7.2$  Hz,  $CH_3$ ), 1.34-1.43 (m, 2H,  $CH_2$ ), 1.55 (d,  $J = 13.6$  Hz, 2H), 1.62-1.70 (m, 4H), 1.83 (s, 6H), 1.88 (d,  $J = 13.2$  Hz, 2H), 1.97 (s, 2H), 3.64 (d, 2H,  $J = 4.0$  Hz,  $CH_2-NH$ ), 4.18 (d, 1H,  $J = 8.4$  Hz, 1H-adamantyl), 5.11 (brs, 1H, NH), 8.12 (s, 1H, CH-pyridazine), 8.19 (d, 1H,  $J = 8.0$  Hz, NH-C=O);  $^{13}C$  NMR ( $CDCl_3$ , 100 MHz)  $\delta$  ppm: 12.74 ( $CH_3$ ), 19.07,

26.14, 26.22, 30.07, 30.85 (2xC), 31.09 (2xC), 36.13 (2xC), 36.52, 41.13 (CH<sub>2</sub>-NH), 52.47 (NH-C-adamantyl), 112.58 (q,  $J_{(C,F)} = 33.5$  Hz, C5), 120.46 (q,  $J_{(C,F)} = 271.5$  Hz, CF<sub>3</sub>), 122.45 (q,  $J_{(C,F)} = 5.0$  Hz, C4), 144.05 (C=N), 153.52 (C=O), 160.31 (-N-C=N); Analysis for C<sub>20</sub>H<sub>27</sub>F<sub>3</sub>N<sub>4</sub>O (396), Calcd.: C, 60.59; H, 6.86; N, 14.13; Found: C, 60.67; H, 6.91; N, 14.05.

N-(Adamantan-2-yl)-6-(cyclopentylamino)-5-(trifluoromethyl)pyridazine-3-carboxamide (11c)

White solid; Yield (36%); m.p. 135-136 °C; <sup>1</sup>H NMR (CDCl<sub>3</sub>, 400 MHz)  $\delta$  ppm: 1.44-1.52 (m, 2H, CH<sub>2</sub>), 1.58 (d, 2H,  $J = 13.2$  Hz), 1.63-1.69 (m, 6H), 1.83 (s, 6H), 1.88 (d,  $J = 13.2$  Hz, 2H), 1.96 (s, 2H), 2.11-2.19 (m, 2H, CH<sub>2</sub>), 4.18 (d, 1H,  $J = 8.0$  Hz, 1H-adamantyl), 4.57-4.65 (m, 1H, CH-cyclopentyl), 5.05 (d, 1H,  $J = 6.0$  Hz, NH), 8.11 (s, 1H, CH-pyridazine), 8.19 (d, 1H,  $J = 8.4$  Hz, NH); <sup>13</sup>C NMR (CDCl<sub>3</sub>, 100 MHz)  $\delta$  ppm: 22.70 (2xC), 26.15, 26.23, 30.84 (2xC), 31.09 (2xC), 32.25 (2xC), 36.14 (2xC), 36.53, 52.49 (CH-cyclopentyl), 52.83 (NH-C-adamantyl), 112.59 (q,  $J_{(C,F)} = 33.4$  Hz, C5), 117.74 (q,  $J_{(C,F)} = 271.6$  Hz, CF<sub>3</sub>), 122.44 (q,  $J_{(C,F)} = 5.1$  Hz, C4), 143.92 (C=N), 153.22 (C=O), 160.35 (-N-C=N); Analysis for C<sub>21</sub>H<sub>27</sub>F<sub>3</sub>N<sub>4</sub>O (408), Calcd.: C, 61.75; H, 6.66; N, 13.72; Found: C, 61.61; H, 6.63; N, 13.68.

N-(Adamantan-2-yl)-6-morpholino-5-(trifluoromethyl)pyridazine-3-carboxamide (11d)

White solid; Yield (50%); m.p. 177-178 °C; <sup>1</sup>H NMR (CDCl<sub>3</sub>, 400 MHz)  $\delta$  ppm: 1.60 (d,  $J = 12.8$  Hz, 2H), 1.70 (s, 2H), 1.84 (s, 6H), 1.87 (d,  $J = 13.6$  Hz, 2H), 1.98 (s, 2H), 3.57 (t, 4H,  $J = 4.0$  Hz, 2xCH<sub>2</sub>-N), 3.79 (t, 4H,  $J = 4.4$  Hz, 2xCH<sub>2</sub>-O), 4.20 (d, 1H,  $J = 8.0$  Hz, 1H-adamantyl), 8.24 (d, 1H,  $J = 8.0$  Hz, NH-C=O), 8.28 (s, 1H, CH-pyridazine); <sup>13</sup>C NMR (CDCl<sub>3</sub>, 100 MHz)  $\delta$  ppm: 26.10, 26.20, 30.86 (2xC), 31.08 (2xC), 36.09 (2xC), 36.48, 49.32 (2xCH<sub>2</sub>-N), 52.60 (adamantyl-C-NH), 65.57 (2xCH<sub>2</sub>-O), 117.63 (q,  $J_{(C,F)} = 272.3$  Hz, CF<sub>3</sub>), 117.83 (q,  $J_{(C,F)} = 34.1$  Hz, C5), 124.98 (q,  $J_{(C,F)} = 5.2$  Hz, C4), 146.54 (C=N), 157.54 (C=O), 159.75 (-N-C=N); Analysis for C<sub>20</sub>H<sub>25</sub>F<sub>3</sub>N<sub>4</sub>O<sub>2</sub> (410), Calcd.: C, 58.53; H, 6.14; N, 13.65; Found: C, 58.45; H, 6.15; N, 13.69.

N-(Adamantan-2-yl)-5-(trifluoromethyl)-6-((2(trifluoromethyl)benzyl)amino)pyridazine-3-carboxamide (11e)

White solid; Yield (41%); m.p. 150-151 °C; <sup>1</sup>H NMR (CDCl<sub>3</sub>, 400 MHz)  $\delta$  ppm: 1.59 (d,  $J$  = 12.4 Hz, 2H), 1.70 (s, 2H), 1.83 (s, 6H), 1.87 (d,  $J$  = 13.2 Hz, 2H), 1.97 (brs, 2H), 4.18-4.20 (m, 1H, 1H-adamantyl), 5.09 (d,  $J$  = 5.6 Hz, 2H, CH<sub>2</sub>-NH), 5.50 (t-like, 1H,  $J$  = 5.6 Hz, NH), 7.34 (t, 1H,  $J$  = 7.6 Hz, C5-Ar), 7.45 (t, 1H,  $J$  = 7.6 Hz, C4-Ar), 7.53 (d, 1H,  $J$  = 8.00 Hz, C6-Ar), 7.63 (d, 1H,  $J$  = 8.00 Hz, C3-Ar), 8.18 (s, 1H, CH-pyridazine), 8.20 (d, 1H,  $J$  = 3.6 Hz, NH-CO); <sup>13</sup>C NMR (CDCl<sub>3</sub>, 100 MHz)  $\delta$  ppm: 26.11, 26.20, 30.85 (2xC), 31.05 (2xC), 31.09, 36.11 (2xC), 36.49, 40.51, 41.69 (CH<sub>2</sub>-NH), 52.57 (NH-C-adamantyl), 113.03 (q,  $J_{(C,F)}$  = 33.6 Hz, C5), 120.29 (q,  $J_{(C,F)}$  = 271.9 Hz, CF<sub>3</sub>-pyridazine), 122.20 (q,  $J_{(C,F)}$  = 256.5 Hz, CF<sub>3</sub>-Ar), 122.72 (q,  $J_{(C,F)}$  = 4.9 Hz, C4), 124.49 (q,  $J_{(C,F)}$  = 26.7 Hz, C2-Ar), 125.38 (q,  $J_{(C,F)}$  = 5.8 Hz, C3-Ar), 127.04 (C5-Ar), 129.19 (C4-Ar), 131.40 (C6-Ar), 134.55 (C1-Ar), 144.92 (C=N), 153.16 (C=O), 160.11 (-N-C=N); Analysis for C<sub>24</sub>H<sub>24</sub>F<sub>6</sub>N<sub>4</sub>O (498), Calcd.: C, 57.83; H, 4.85; N, 11.24; Found: C, 57.94; H, 4.88; N, 11.19.

N-(tert-Butyl)-6-(cyclopentylamino)-5-(trifluoromethyl)pyridazine-3-carboxamide (11f)

Brown solid; Yield (71%); m.p. 62-63 °C; <sup>1</sup>H NMR (CDCl<sub>3</sub>, 400 MHz)  $\delta$  ppm: 1.40 (s, 9H, 3xCH<sub>3</sub>), 1.43-1.51 (m, 2H, CH<sub>2</sub>), 1.58-1.72 (m, 4H, 2xCH<sub>2</sub>), 2.11-2.18 (m, 2H, CH<sub>2</sub>), 4.53-4.61 (m, 1H, CH-cyclopentyl), 5.05 (brs, 1H, NH), 7.76 (brs, 1H, NH-C=O), 8.10 (s, 1H, CH-pyridazine); <sup>13</sup>C NMR (CDCl<sub>3</sub>, 100 MHz)  $\delta$  ppm: 22.72 (2xCH<sub>2</sub>), 27.78 (3xCH<sub>3</sub>), 32.22 (2xCH<sub>2</sub>-CH), 50.32 (NH-C-t-butyl), 52.87 (CH-NH), 112.68 (q,  $J_{(C,F)}$  = 33.6 Hz, C5), 120.43 (q,  $J_{(C,F)}$  = 271.4 Hz, CF<sub>3</sub>), 122.10 (q,  $J_{(C,F)}$  = 5.0 Hz, C4), 144.20 (C=N), 153.11 (C=O), 160.40 (-N-C=N); Analysis for C<sub>15</sub>H<sub>21</sub>F<sub>3</sub>N<sub>4</sub>O (330), Calcd.: C, 54.54; H, 6.41; N, 16.96; Found: C, 54.72; H, 6.38; N, 17.05.

N-(tert-Butyl)-6-morpholino-5-(trifluoromethyl)pyridazine-3-carboxamide (11g)

Light yellow solid; Yield (73%); m.p. 121-122 °C; <sup>1</sup>H NMR (CDCl<sub>3</sub>, 400 MHz)  $\delta$  ppm: 1.43 (s, 9H, 3xCH<sub>3</sub>), 3.56 (t, 4H,  $J$  = 4.4 Hz, 2xCH<sub>2</sub>-N), 3.79 (t, 4H,  $J$  = 4.8 Hz, 2xCH<sub>2</sub>-O), 7.79 (brs, 1H, NH), 8.27 (s, 1H, CH-pyridazine); <sup>13</sup>C NMR (CDCl<sub>3</sub>, 100 MHz)  $\delta$  ppm: 27.74 (3xCH<sub>3</sub>), 49.30 (2xCH<sub>2</sub>-N), 50.53 (C-NH), 65.55 (2xCH<sub>2</sub>-O), 117.61 (q,  $J_{(C,F)}$  = 272.4 Hz, CF<sub>3</sub>), 117.92 (q,  $J_{(C,F)}$  = 34.1 Hz, C5), 124.66 (q,  $J_{(C,F)}$  = 5.2 Hz, C4), 146.86 (C=N), 157.44 (C=O), 159.79 (-N-C=N); Analysis for C<sub>14</sub>H<sub>19</sub>F<sub>3</sub>N<sub>4</sub>O<sub>2</sub> (332), Calcd.: C, 50.60; H, 5.76; N, 16.86; Found: C, 50.49; H, 5.77; N, 16.90.

N-(tert-Butyl)-5-(trifluoromethyl)-6-((2-(trifluoromethyl) benzyl) amino)pyridazine-3-carboxamide (11h)

White solid; Yield (43%); m.p. 132-133 °C;  $^1\text{H}$  NMR ( $\text{CDCl}_3$ , 400 MHz)  $\delta$  ppm: 1.40 (s, 9H, 3x $\text{CH}_3$ ), 5.07 (d, 2H,  $J = 6.0$  Hz,  $\text{CH}_2\text{-NH}$ ), 5.51 (t-like, 1H,  $J = 6.0$  Hz, NH), 7.33 (t, 1H,  $J = 7.6$  Hz, C5-Ar), 7.44 (t, 1H,  $J = 7.6$  Hz, C4-Ar), 7.51 (d, 1H,  $J = 7.6$  Hz, C6-Ar), 7.62 (d, 1H,  $J = 7.6$  Hz, C3-Ar), 7.72 (brs, 1H, NH-C=O), 8.16 (s, 1H, CH-pyridazine);  $^{13}\text{C}$  NMR ( $\text{CDCl}_3$ , 100 MHz)  $\delta$  ppm: 27.75 (3x $\text{CH}_3$ ), 41.66 ( $\text{CH}_2\text{-NH}$ ), 50.42 (NH-C-t-butyl), 113.13 (q,  $J_{(\text{C,F})} = 33.6$  Hz, C5), 120.28 (q,  $J_{(\text{C,F})} = 271.8$  Hz,  $\text{CF}_3\text{-pyridazine}$ ), 122.05 (q,  $J_{(\text{C,F})} = 272.1$  Hz,  $\text{CF}_3\text{-Ar}$ ), 122.42 (q,  $J_{(\text{C,F})} = 4.8$  Hz, C4), 125.37 (q,  $J_{(\text{C,F})} = 5.7$  Hz, C3-Ar), 127.26 (q,  $J_{(\text{C,F})} = 30.5$  Hz, C2-Ar), 126.97 (C6-Ar), 129.06 (C4-Ar), 131.34 (C5-Ar), 134.58 (C1-Ar), 145.26 (C=N), 153.06 (C=O), 160.15 (-N-C=N); Analysis for  $\text{C}_{18}\text{H}_{18}\text{F}_6\text{N}_4\text{O}$  (420), Calcd.: C, 51.43; H, 4.32; N, 13.33; Found: C, 51.50; H, 4.29; N, 13.31.

N-Butyl-6-morpholino-5-(trifluoromethyl)pyridazine-3-carboxamide (11i)

Brown oil; Yield (69%);  $^1\text{H}$  NMR ( $\text{CDCl}_3$ , 400 MHz)  $\delta$  ppm: 0.86 (t, 3H,  $J = 7.2$  Hz,  $\text{CH}_3$ ), 1.31-1.40 (m, 2H,  $\text{CH}_2$ ), 1.51-1.59 (m, 2H,  $\text{CH}_2$ ), 3.41 (q, 2H,  $J = 6.8$  Hz,  $\text{CH}_2\text{-NH}$ ), 3.57 (t, 4H,  $J = 4.8$  Hz, 2x $\text{CH}_2\text{-N}$ ), 3.79 (t, 4H,  $J = 4.8$  Hz, 2x $\text{CH}_2\text{-O}$ ), 7.83 (t-like,  $J = 4.0$  Hz, 1H, NH), 8.27 (s, 1H, CH-pyridazine);  $^{13}\text{C}$  NMR ( $\text{CDCl}_3$ , 100 MHz)  $\delta$  ppm: 12.09 ( $\text{CH}_3$ ), 19.03, 30.53 ( $\text{CH}_2$ ), 38.30 ( $\text{CH}_2\text{-NH}$ ), 49.26 (2x $\text{CH}_2\text{-N}$ ), 65.56 (2x $\text{CH}_2\text{-O}$ ), 117.66 (q,  $J_{(\text{C,F})} = 34.2$  Hz, C5), 120.35 (q,  $J_{(\text{C,F})} = 272.5$  Hz,  $\text{CF}_3$ ), 124.93 (q,  $J_{(\text{C,F})} = 5.2$  Hz, C4), 146.14, 157.46 (C=O), 160.73 (-N-C=N); Analysis for  $\text{C}_{14}\text{H}_{19}\text{F}_3\text{N}_4\text{O}_2$  (332), Calcd.: C, 50.60; H, 5.76; N, 16.86; Found: C, 50.77; H, 5.78; N, 16.93.

6-((2-Hydroxyethyl)amino)-N-((tetrahydro-2H-pyran-4-yl)methyl)-5-(trifluoromethyl)pyridazine-3-carboxamide (11j)

White solid; Yield (79%); m.p. 95-96 °C;  $^1\text{H}$  NMR ( $\text{CDCl}_3$ , 400 MHz)  $\delta$  ppm: 1.24-1.37 (m, 2H), 1.59 (d, 2H,  $J = 12.8$  Hz), 1.76-1.82 (m, 1H, CH), 3.27-3.34 (m, 4H, 2x $\text{CH}_2\text{-O}$ ), 3.83 (t, 2H,  $J = 4.4$  Hz,  $\text{CH}_2\text{-NH}$ ), 3.87 (t, 2H,  $J = 4.8$  Hz,  $\text{CH}_2\text{-OH}$ ), 3.91 (d, 2H,  $J = 3.2$  Hz), 5.74 (brs, 1H, NH), 7.89 (t-like, 1H,  $J = 4.4$  Hz, NH-C=O), 8.12 (s, 1H, CH-pyridazine);  $^{13}\text{C}$  NMR ( $\text{CDCl}_3$ , 100 MHz)  $\delta$  ppm: 29.57 (2x $\text{CH}_2$ ), 34.47 (CH), 43.44, 44.10

(CH<sub>2</sub>-NH), 60.12 (CH<sub>2</sub>-O), 66.54 (2xCH<sub>2</sub>-O), 113.16 (q,  $J_{(C,F)} = 33.8$  Hz, C5), 120.23 (q,  $J_{(C,F)} = 271.7$  Hz, CF<sub>3</sub>), 122.67 (q,  $J_{(C,F)} = 5.1$  Hz, C4), 143.82 (C=N), 153.90 (C=O), 161.43 (-N-C=N); Analysis for C<sub>14</sub>H<sub>19</sub>F<sub>3</sub>N<sub>4</sub>O<sub>3</sub> (348), Calcd.: C, 48.27; H, 5.50; N, 16.08; Found: C, 48.16; H, 5.49; N, 16.11.

6-(Butylamino)-N-((tetrahydro-2*H*-pyran-4-yl)methyl)-5-(trifluoromethyl)pyridazine-3-carboxamide (11k)

Yellow oil; Yield (48%); <sup>1</sup>H NMR (CDCl<sub>3</sub>, 400 MHz)  $\delta$  ppm: 0.89 (t, 3H,  $J = 7.2$  Hz, CH<sub>3</sub>), 1.26-1.43 (m, 4H), 1.59-1.69 (m, 4H), 1.75-1.83 (m, 1H, CH), 3.27 (m, 2H), 3.33 (t, 2H,  $J = 6.4$  Hz), 3.64 (q, 2H,  $J = 6.8$  Hz, CH<sub>2</sub>-NH), 3.89 (dd, 2H,  $J = 3.2, 11.2$  Hz, 2xCH<sub>2</sub>-N), 5.17 (brs, 1H, NH), 7.89 (t-like, 1H,  $J = 5.2$  Hz, NH-C=O), 8.11 (s, 1H, CH-pyridazine); <sup>13</sup>C NMR (CDCl<sub>3</sub>, 100 MHz)  $\delta$  ppm: 13.22 (CH<sub>3</sub>), 29.57 (2xCH<sub>2</sub>), 34.45, 34.51, 43.44, 44.07 (CH<sub>2</sub>-NH), 46.34, 66.55 (2xCH<sub>2</sub>-O), 112.50 (q,  $J_{(C,F)} = 33.5$  Hz, C5), 120.37 (q,  $J_{(C,F)} = 271.7$  Hz, CF<sub>3</sub>), 122.44 (q,  $J_{(C,F)} = 4.9$  Hz, C4), 143.55 (C=N), 153.46 (C=O), 161.49 (-N-C=N); Analysis for C<sub>16</sub>H<sub>23</sub>F<sub>3</sub>N<sub>4</sub>O<sub>2</sub> (360), Calcd.: C, 53.33; H, 6.43; N, 15.55; Found: C, 53.48; H, 6.44; N, 15.59.

6-((Cyclopropylmethyl)amino)-N-((tetrahydro-2*H*-pyran-4-yl)methyl)-5-(trifluoromethyl)pyridazine-3-carboxamide (11l)

Yellow oil; Yield (38%); <sup>1</sup>H NMR (CDCl<sub>3</sub>, 400 MHz)  $\delta$  ppm: 0.25 (q-like, 2H,  $J = 4.8$  Hz), 0.53 (q-like, 2H,  $J = 5.6$  Hz), 1.10-1.17 (m, 1H), 1.26-1.37 (m, 2H), 1.59 (d, 2H,  $J = 12.8$  Hz), 1.76-1.80 (m, 1H), 3.27-3.35 (m, 4H, 2xCH<sub>2</sub>-THP), 3.49 (dd, 2H,  $J = 4.8, 6.8$  Hz, CH<sub>2</sub>-NH), 3.85 (dd, 2H,  $J = 2.8, 11.2$  Hz), 5.30 (brs, 1H, NH), 7.90 (t-like, 1H,  $J = 6.4$  Hz, NH-C=O), 8.11 (s, 1H, CH-pyridazine); <sup>13</sup>C NMR (CDCl<sub>3</sub>, 100 MHz)  $\delta$  ppm: 12.74, 13.22, 19.06, 29.60 (2xCH<sub>2</sub>), 30.02, 34.51 (CH), 41.12 (CH<sub>2</sub>-NHCO), 44.07 (CH<sub>2</sub>-NH), 66.55 (2xCH<sub>2</sub>-O), 112.53 (q,  $J_{(C,F)} = 33.0$  Hz, C5), 120.23 (q,  $J_{(C,F)} = 271.6$  Hz, CF<sub>3</sub>), 122.67 (q,  $J_{(C,F)} = 5.0$  Hz, C4), 143.45 (C=N), 153.59 (C=O), 161.49 (-N-C=N); Analysis for C<sub>16</sub>H<sub>21</sub>F<sub>3</sub>N<sub>4</sub>O<sub>2</sub> (358), Calcd.: C, 53.63; H, 5.91; N, 15.63; Found: C, 53.71; H, 5.86; N, 15.69.



6-Morpholino-N-((tetrahydro-2H-pyran-4-yl)methyl)-5-(trifluoromethyl)pyridazine-3-carboxamide (11m)

Light Yellow solid; Yield (73%); m.p. 67-68 °C;  $^1\text{H}$  NMR ( $\text{CDCl}_3$ , 400 MHz)  $\delta$  ppm: 1.27-1.38 (m, 2H), 1.60 (d, 2H,  $J = 11.6$  Hz), 1.77-1.85 (m, 1H, CH), 3.27-3.37 (m, 2H), 3.33 (t, 2H,  $J = 6.4$  Hz), 3.58 (t, 4H,  $J = 4.4$  Hz,  $2\times\text{CH}_2\text{-N}$ ), 3.79 (t, 4H,  $J = 4.8$  Hz,  $2\times\text{CH}_2\text{-O}$ ), 3.89 (dd, 2H,  $J = 3.6$  Hz,  $\text{CH}_2\text{-NH}$ ), 7.94 (t-like, 1H,  $J = 5.6$  Hz,  $\text{NH-C=O}$ ), 8.26 (s, 1H, CH-pyridazine);  $^{13}\text{C}$  NMR ( $\text{CDCl}_3$ , 100 MHz)  $\delta$  ppm: 29.59 ( $2\times\text{CH}_2$ ), 34.49 (CH), 44.17 ( $\text{CH}_2\text{-NH}$ ), 49.24 ( $2\times\text{CH}_2\text{-N}$ ), 65.54 ( $2\times\text{CH}_2\text{-O}$ ), 66.52 ( $2\times\text{CH}_2\text{-O}$ , THP), 117.55 (q,  $J_{\text{(C,F)}} = 33.9$  Hz, C5), 120.32 (q,  $J_{\text{(C,F)}} = 272.4$  Hz,  $\text{CF}_3$ ), 124.98 (q,  $J_{\text{(C,F)}} = 5.3$  Hz, C4), 145.86 (C=N), 157.46 (C=O), 160.99 ( $\text{-N-C=N}$ ); Analysis for  $\text{C}_{16}\text{H}_{21}\text{F}_3\text{N}_4\text{O}_3$  (374), Calcd.: C, 51.33; H, 5.65; N, 14.97; Found: C, 51.46; H, 5.68; N, 14.95.

6-((2-Hydroxyethyl)amino)-5-(trifluoromethyl)-N-(2-(trifluoromethyl) benzyl)pyridazine-3-carboxamide (11n)

Yellow oil; Yield (57%);  $^1\text{H}$  NMR ( $\text{CDCl}_3$ , 400 MHz)  $\delta$  ppm: 3.80-3.84 (m, 4H,  $2\times\text{CH}_2$ ), 4.77 (d, 2H,  $J = 6.0$  Hz,  $\text{CH}_2\text{-NH}$ ), 5.76 (brs, 1H, NH), 7.29 (t, 1H,  $J = 7.6$  Hz, C5-Ar), 7.41 (t, 1H,  $J = 7.6$  Hz, C4-Ar), 7.50 (d, 1H,  $J = 7.6$  Hz, C6-Ar), 7.57 (d, 1H,  $J = 7.6$  Hz, C3-Ar), 8.13 (s, 1H, CH-pyridazine), 8.16 (t-like, 1H,  $J = 5.2$  Hz,  $\text{NH-CO}$ ); Analysis for  $\text{C}_{16}\text{H}_{14}\text{F}_6\text{N}_4\text{O}_2$  (408), Calcd.: C, 47.07; H, 3.46; N, 13.72; Found: C, 46.92; H, 3.44; N, 13.76.

6-(Butylamino)-5-(trifluoromethyl)-N-(2-(trifluoromethyl)benzyl)pyridazine-3-carboxamide (11o)

Yellow oil; Yield (60%);  $^1\text{H}$  NMR ( $\text{CDCl}_3$ , 400 MHz)  $\delta$  ppm: 0.87 (t, 3H,  $J = 7.6$  Hz,  $\text{CH}_3$ ), 1.33-1.41 (m, 2H,  $\text{CH}_2$ ), 1.59-1.67 (m, 2H,  $\text{CH}_2$ ), 3.62 (q, 2H,  $J = 7.2$  Hz,  $\text{CH}_2\text{-NH}$ ), 4.78 (d, 2H,  $J = 6.4$  Hz,  $\text{CH}_2$ ), 5.17 (brs, 1H, NH), 7.29 (t, 1H,  $J = 7.6$  Hz, C5-Ar), 7.42 (t, 1H,  $J = 7.6$  Hz, C4-Ar), 7.52 (d, 1H,  $J = 8.0$  Hz, C6-Ar), 7.58 (d, 1H,  $J = 8.0$  Hz, C3-Ar), 8.12 (s, 1H, CH-pyridazine), 8.14 (t-like, 1H,  $J = 5.6$  Hz,  $\text{NH-CO}$ ); Analysis for  $\text{C}_{18}\text{H}_{18}\text{F}_6\text{N}_4\text{O}$  (420), Calcd.: C, 51.43; H, 4.32; N, 13.33; Found: C, 51.54; H, 4.30; N, 13.39.

6-((Cyclopropylmethyl)amino)-5-(trifluoromethyl)-N-(2-(trifluoromethyl)benzyl)pyridazine-3-carboxamide (11p)

Yellow oil; Yield (61%);  $^1\text{H}$  NMR ( $\text{CDCl}_3$ , 400 MHz)  $\delta$  ppm: 0.23 (q-like, 2H,  $J = 5.2$  Hz,  $\text{CH}_2$ ), 0.52 (q-like, 2H,  $J = 5.2$  Hz,  $\text{CH}_2$ ), 1.09-1.15 (m, 1H, CH), 3.47 (dd, 2H,  $J = 5.6, 6.4$  Hz,  $\text{CH}_2$ ), 4.78 (d, 2H,  $J = 6.4$  Hz,  $\text{CH}_2$ ), 5.28 (brs, 1H, NH), 7.29 (t, 1H,  $J = 7.6$  Hz, C5-Ar), 7.42 (t, 1H,  $J = 7.6$  Hz, C4-Ar), 7.52 (d, 1H,  $J = 7.6$  Hz, C6-Ar), 7.58 (d, 1H,  $J = 7.6$  Hz, C3-Ar), 8.13 (s, 1H, CH-pyridazine), 8.16 (t-like, 1H,  $J = 5.6$  Hz, NH-CO); Analysis for  $\text{C}_{18}\text{H}_{16}\text{F}_6\text{N}_4\text{O}$  (418), Calcd.: C, 51.68; H, 3.86; N, 13.39; Found: C, 51.59; H, 3.87; N, 13.41.

6-(Cyclopentylamino)-5-(trifluoromethyl)-N-(2-(trifluoromethyl)benzyl)pyridazine-3-carboxamide (11q)

Yellow oil; Yield (51%);  $^1\text{H}$  NMR ( $\text{DMSO}-d_6$ , 400 MHz)  $\delta$  ppm: 1.42-1.50 (m, 2H,  $\text{CH}_2$ ), 1.58-1.71 (m, 4H,  $2\times\text{CH}_2$ ), 2.09-2.16 (m, 2H,  $\text{CH}_2$ ), 4.77 (d, 2H,  $J = 6.4$  Hz,  $\text{CH}_2\text{-NH}$ ), 5.08 (d, 1H,  $J = 5.6$  Hz, NH), 7.29 (t, 1H,  $J = 7.6$  Hz, C5-Ar), 7.42 (t, 1H,  $J = 7.6$  Hz, C4-Ar), 7.52 (d, 1H,  $J = 7.6$  Hz, C6-Ar), 7.58 (d, 1H,  $J = 7.6$  Hz, C3-Ar), 8.12 (s, 1H, CH-pyridazine), 8.14 (t-like, 1H,  $J = 5.6$  Hz, NH-CO); Analysis for  $\text{C}_{19}\text{H}_{18}\text{F}_6\text{N}_4\text{O}$  (432), Calcd.: C, 52.78; H, 4.20; N, 12.96; Found: C, 52.90; H, 4.16; N, 12.94.

6-Morpholino-5-(trifluoromethyl)-N-(2-(trifluoromethyl)benzyl)pyridazine-3-carboxamide (11r)

Yellow oil; Yield (60%);  $^1\text{H}$  NMR ( $\text{CDCl}_3$ , 400 MHz)  $\delta$  ppm: 3.65 (t, 4H,  $J = 4.4$  Hz,  $2\times\text{CH}_2\text{-N}$ ), 3.85 (t, 4H,  $J = 4.8$  Hz,  $2\times\text{CH}_2\text{-O}$ ), 4.87 (d, 2H,  $J = 6$  Hz,  $\text{CH}_2\text{-NH}$ ), 7.38 (t, 1H,  $J = 7.6$  Hz, C5-Ar), 7.50 (t, 1H,  $J = 8.0$  Hz, C4-Ar), 7.61 (d, 1H,  $J = 7.6$  Hz, C6-Ar), 7.67 (d, 1H,  $J = 8.0$  Hz, C3-Ar), 8.26 (t-like, 1H,  $J = 5.2$  Hz, NH-CO), 8.35 (s, 1H, CH-pyridazine); Analysis for  $\text{C}_{18}\text{H}_{16}\text{F}_6\text{N}_4\text{O}_2$  (434), Calcd.: C, 49.78; H, 3.71; N, 12.90; Found: C, 49.84; H, 3.72; N, 12.87.

## 2. Anti-proliferative activities

The three examined human cancer cell lines; T-47D (breast cancer), MDA-MB-231 (breast carcinoma) and SKOV-3 (ovarian cancer), as well as the non-tumorigenic human breast cell line (MCF-10A) have been obtained from American Type Culture Collection (ATCC). The cells were maintained in Dulbecco's modified Eagle's medium (DMEM) supplemented with 10% heat inactivated fetal calf serum (GIBCO), penicillin (100 U/ml) and streptomycin (100 µg/ml) at 37 °C in humidified atmosphere containing 5% CO<sub>2</sub>. Cells at a concentration of 0.50 x 10<sup>6</sup> were grown in a 25 cm<sup>2</sup> flask in 5 ml of culture medium.

The anti-proliferative activity of the tested pyridazines **11a-r** was measured *in vitro* using the Sulfo-Rhodamine-B stain (SRB) assay. Briefly, Cells were inoculated in 96-well microtiter plate (5X10<sup>4</sup> cells/ well) for 24 h before treatment with the tested pyridazines to allow attachment of cell to the wall of the plate. Tested pyridazines were dissolved in DMSO at 1 mg/ml immediately before use and diluted to the appropriate volume just before addition to the cell culture. Different concentrations of tested pyridazines and staurosporine were added to the cells (three wells were prepared for each individual dose). Cells were incubated with the pyridazines for 48 h at 37°C and in atmosphere of 5% CO<sub>2</sub>. After 48 h cells were fixed, washed, and stained for 30 min with 0.4% (w/v) SRB dissolved in 1% acetic acid. Unbound dye was removed by four washes with 1% acetic acid, and attached stain was recovered with Tris-EDTA buffer. Color intensity was measured in an ELISA reader. The relation between percent of surviving fraction and drug concentration is plotted to get the survival curve for each cell line. The concentration required for 50% inhibition of cell viability (IC<sub>50</sub>) was calculated.

## 3. Cell Cycle Analysis

Breast cancer T-47D and MDA-MB-231 cells were treated with pyridazines **11l** and **11m** for 24 h (at their IC<sub>50</sub> concentration), and then cells were washed twice with ice-cold phosphate buffered saline (PBS). Subsequently, the treated cells were collected by centrifugation, fixed in ice-cold 70% (v/v) ethanol, washed with PBS, re-suspended with 100 µg/mL RNase, stained with 40 µg/mL PI, and analyzed by flow cytometry using FACS Calibur (Becton Dickinson, BD, Franklin Lakes, NJ, USA). The cell cycle distributions were calculated using CellQuest software 5.1 (Becton Dickinson).

#### 4. Annexin V-FITC Apoptosis Assay

Phosphatidylserine externalization was assayed using Annexin V-FITC/PI apoptosis detection kit (BD Biosciences, USA) according to the manufacturer's instructions. Breast cancer T-47D and MDA-MB-231 cells were cultured to a monolayer then treated with pyridazines **11l** and **11m** at their IC<sub>50</sub> concentration. Briefly, cells were then harvested *via* trypsinization, and rinsed twice in PBS followed by binding buffer. Moreover, cells were re-suspended in 100 µL of binding buffer with the addition of 1 µL of FITC-Annexin V followed by an incubation period of 30 min at 4 °C. Cells were then rinsed in binding buffer and resuspended in 150 µL of binding buffer with the addition of 1 µL of DAPI (1 µg/µL in PBS). Cells were then analyzed using the flow cytometer BD FACS Canto II and the results were interpreted with FlowJo7.6.4 software (Tree Star, Ashland, OR, USA).

#### 5. CDK Kinase Inhibitory Activity

The CDK2 enzyme inhibitory activity was determined for pyridazines **11e**, **11h**, **11l**, and **11m** using the CDK2/CyclinA2 Kinase Enzyme System (catalog No. V2971) (Promega, Milan, Italy), according to the manufacturer's instructions.

#### 6. Statistical Analysis

Data are presented as means ± S.D. Individual groups were compared using the two-tailed independent Student's *t*-test. Multiple group comparisons were carried out using one-way analysis of variance (ANOVA) followed by the Tukey–Kramer test for post-hoc analysis. Statistical significance was accepted at a level of  $p < 0.05$ . All statistical analyses were performed using GraphPad InStat software, version 3.05 (GraphPad Software, Inc., La Jolla, CA, USA). Graphs were sketched using GraphPad Prism software, version 5.00 (GraphPad Software, Inc., La Jolla, CA, USA).

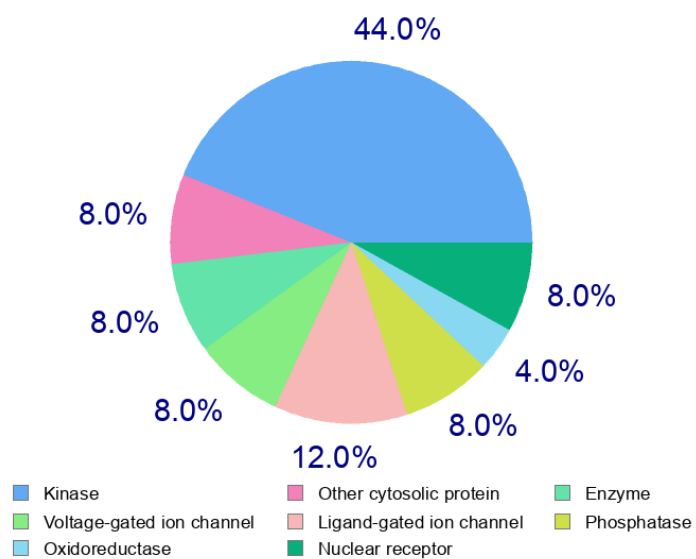

Figure S1. Different target classes suggested by SwissTargetPrediction online tool (for compound 5J), showing the protein kinases as the most probable targets

# SwissTargetPrediction

| Target                                                     | Common name                     | Uniprot ID                           | ChEMBL ID     | Target Class              | Probability*   | Known actives (3D/2D) |
|------------------------------------------------------------|---------------------------------|--------------------------------------|---------------|---------------------------|----------------|-----------------------|
| Pyruvate dehydrogenase kinase isoform 2                    | PDK2                            | Q15119                               | CHEMBL3861    | Kinase                    | 0.104671941128 | 131 / 0               |
| MAP kinase signal-integrating kinase 2                     | MKMK2                           | Q9HBH9                               | CHEMBL4204    | Kinase                    | 0.104671941128 | 1 / 0                 |
| Tyrosine-protein kinase JAK1                               | JAK1                            | P23458                               | CHEMBL2835    | Kinase                    | 0.104671941128 | 78 / 0                |
| Tyrosine-protein kinase JAK2                               | JAK2                            | O60674                               | CHEMBL2971    | Kinase                    | 0.104671941128 | 87 / 0                |
| Leucine-rich repeat serine/threonine-protein kinase 2      | LRRK2                           | Q5S007                               | CHEMBL1075104 | Kinase                    | 0.104671941128 | 88 / 0                |
| Cyclin-dependent kinase 1/cyclin B                         | CCNB3<br>CDK1<br>CCNB1<br>CCNB2 | Q8WWL7<br>P06493<br>P14635<br>O95067 | CHEMBL2094127 | Other cytosolic protein   | 0.104671941128 | 4 / 0                 |
| Cyclin-dependent kinase 2/cyclin A                         | CDK2<br>CCNA1<br>CCNA2          | P24941<br>P78396<br>P20248           | CHEMBL2094128 | Other cytosolic protein   | 0.104671941128 | 1 / 0                 |
| Acyl-CoA desaturase                                        | SCD                             | O00767                               | CHEMBL5555    | Enzyme                    | 0.104671941128 | 19 / 110              |
| Tyrosine-protein kinase SRC                                | SRC                             | P12931                               | CHEMBL267     | Kinase                    | 0.104671941128 | 10 / 0                |
| Tyrosine-protein kinase ZAP-70                             | ZAP70                           | P43403                               | CHEMBL2803    | Kinase                    | 0.104671941128 | 6 / 0                 |
| Sodium channel protein type X alpha subunit (by homology)  | SCN10A                          | Q9Y5Y9                               | CHEMBL5451    | Voltage-gated ion channel | 0.104671941128 | 4 / 0                 |
| Glutamate NMDA receptor; GRIN1/GRIN2A                      | GRIN2A<br>GRIN1                 | Q12879<br>Q05586                     | CHEMBL1907604 | Ligand-gated ion channel  | 0.104671941128 | 3 / 0                 |
| Glutamate receptor ionotropic, AMPA 2                      | GRIA2                           | P42262                               | CHEMBL4016    | Ligand-gated ion channel  | 0.104671941128 | 19 / 0                |
| PI3-kinase p110-alpha subunit                              | PIK3CA                          | P42336                               | CHEMBL4005    | Enzyme                    | 0.104671941128 | 51 / 0                |
| Protein-tyrosine phosphatase 1B                            | PTPN1                           | P18031                               | CHEMBL335     | Phosphatase               | 0.104671941128 | 27 / 0                |
| T-cell protein-tyrosine phosphatase                        | PTPN2                           | P17706                               | CHEMBL3807    | Phosphatase               | 0.104671941128 | 16 / 0                |
| Serine/threonine-protein kinase AKT                        | AKT1                            | P31749                               | CHEMBL4282    | Kinase                    | 0.104671941128 | 21 / 0                |
| HERG                                                       | KCNH2                           | Q12809                               | CHEMBL240     | Voltage-gated ion channel | 0.104671941128 | 87 / 0                |
| Inhibitor of nuclear factor kappa B kinase epsilon subunit | IKBKE                           | Q14164                               | CHEMBL3529    | Kinase                    | 0.104671941128 | 1 / 0                 |
| Arachidonate 5-lipoxygenase                                | ALOX5                           | P09917                               | CHEMBL215     | Oxidoreductase            | 0.104671941128 | 6 / 0                 |
| LXR-alpha                                                  | NR1H3                           | Q13133                               | CHEMBL2808    | Nuclear receptor          | 0.104671941128 | 66 / 0                |
| LXR-beta                                                   | NR1H2                           | P55055                               | CHEMBL4093    | Nuclear receptor          | 0.104671941128 | 78 / 0                |

| Target                                                    | Common name | Uniprot ID | ChEMBL ID     | Target Class              | Probability*   | Known actives (3D/2D) |
|-----------------------------------------------------------|-------------|------------|---------------|---------------------------|----------------|-----------------------|
| Cyclin-dependent kinase 2                                 | CDK2        | P24941     | CHEMBL301     | Kinase                    | 0.104671941128 | 18 / 0                |
| Cyclin-dependent kinase 1                                 | CDK1        | P06493     | CHEMBL308     | Kinase                    | 0.104671941128 | 15 / 0                |
| P2X purinoceptor 7                                        | P2RX7       | Q99572     | CHEMBL4805    | Ligand-gated ion channel  | 0.104671941128 | 21 / 0                |
| GABA receptor alpha-5 subunit                             | GABRA5      | P31644     | CHEMBL5112    | Ligand-gated ion channel  | 0.104671941128 | 20 / 0                |
| MAP kinase ERK2                                           | MAPK1       | P28482     | CHEMBL4040    | Kinase                    | 0.104671941128 | 9 / 0                 |
| Microtubule-associated protein 2                          | MAP2        | P11137     | CHEMBL2390810 | Unclassified protein      | 0.104671941128 | 10 / 0                |
| Cathepsin K                                               | CTSK        | P43235     | CHEMBL268     | Protease                  | 0.104671941128 | 15 / 0                |
| Cathepsin S                                               | CTSS        | P25774     | CHEMBL2954    | Protease                  | 0.104671941128 | 12 / 0                |
| Cholesteryl ester transfer protein                        | CETP        | P11597     | CHEMBL3572    | Other ion channel         | 0.104671941128 | 61 / 0                |
| 11-beta-hydroxysteroid dehydrogenase 1                    | HSD11B1     | P28845     | CHEMBL4235    | Enzyme                    | 0.104671941128 | 88 / 0                |
| Sodium channel protein type IX alpha subunit              | SCN9A       | Q15858     | CHEMBL4296    | Voltage-gated ion channel | 0.104671941128 | 66 / 0                |
| Hormone sensitive lipase                                  | LIPE        | Q05469     | CHEMBL3590    | Enzyme                    | 0.104671941128 | 25 / 0                |
| Vanilloid receptor                                        | TRPV1       | Q8NER1     | CHEMBL4794    | Voltage-gated ion channel | 0.104671941128 | 268 / 0               |
| Fibroblast growth factor receptor 3                       | FGFR3       | P22607     | CHEMBL2742    | Kinase                    | 0.104671941128 | 32 / 0                |
| 15-hydroxyprostaglandin dehydrogenase [NAD <sup>+</sup> ] | HPGD        | P15428     | CHEMBL1293255 | Enzyme                    | 0.104671941128 | 3 / 0                 |
| ADAM17                                                    | ADAM17      | P78536     | CHEMBL3706    | Protease                  | 0.104671941128 | 7 / 0                 |
| Signal transducer and activator of transcription 3        | STAT3       | P40763     | CHEMBL4026    | Transcription factor      | 0.104671941128 | 1 / 0                 |
| Dihydroorotate dehydrogenase                              | DHODH       | Q02127     | CHEMBL1966    | Oxidoreductase            | 0.104671941128 | 7 / 0                 |
| Beta-glucocerebrosidase                                   | GBA         | P04062     | CHEMBL2179    | Enzyme                    | 0.104671941128 | 1 / 0                 |
| Epoxide hydratase                                         | EPHX2       | P34913     | CHEMBL2409    | Protease                  | 0.104671941128 | 29 / 0                |
| Sodium channel protein type V alpha subunit               | SCN5A       | Q14524     | CHEMBL1980    | Voltage-gated ion channel | 0.0            | 5 / 0                 |
| Tyrosine kinase non-receptor protein 2                    | TNK2        | Q07912     | CHEMBL4599    | Kinase                    | 0.0            | 1 / 0                 |
| 5-lipoxygenase activating protein                         | ALOX5AP     | P20292     | CHEMBL4550    | Other cytosolic protein   | 0.0            | 16 / 0                |
| Beta-secretase 1                                          | BACE1       | P56817     | CHEMBL4822    | Protease                  | 0.0            | 78 / 0                |
| Diacylglycerol O-acyltransferase 1                        | DGAT1       | O75907     | CHEMBL6009    | Enzyme                    | 0.0            | 14 / 0                |
| Thrombin and coagulation factor X                         | F10         | P00742     | CHEMBL244     | Protease                  | 0.0            | 97 / 0                |

| Target                                                           | Common name    | Uniprot ID       | ChEMBL ID     | Target Class                        | Probability* | Known actives (3D/2D) |
|------------------------------------------------------------------|----------------|------------------|---------------|-------------------------------------|--------------|-----------------------|
| Probable G-protein coupled receptor 52                           | GPR52          | Q9Y2T5           | CHEMBL3297639 | Family A G protein-coupled receptor | 0.0          | 11 / 0                |
| Cathepsin L                                                      | CTSL           | P07711           | CHEMBL3837    | Protease                            | 0.0          | 1 / 0                 |
| Phosphodiesterase 5A                                             | PDE5A          | O76074           | CHEMBL1827    | Phosphodiesterase                   | 0.0          | 21 / 0                |
| Mitogen-activated protein kinase kinase kinase 12                | MAP3K12        | Q12852           | CHEMBL1908389 | Enzyme                              | 0.0          | 62 / 0                |
| Glucagon-like peptide 1 receptor                                 | GLP1R          | P43220           | CHEMBL1784    | Family B G protein-coupled receptor | 0.0          | 3 / 0                 |
| Glucagon receptor                                                | GCGR           | P47871           | CHEMBL1985    | Family B G protein-coupled receptor | 0.0          | 10 / 0                |
| Glucocorticoid receptor                                          | NR3C1          | P04150           | CHEMBL2034    | Nuclear receptor                    | 0.0          | 25 / 0                |
| Fibroblast growth factor receptor 1                              | FGFR1          | P11362           | CHEMBL3650    | Kinase                              | 0.0          | 2 / 0                 |
| Monocarboxylate transporter 1                                    | SLC16A1        | P53985           | CHEMBL4360    | Electrochemical transporter         | 0.0          | 6 / 0                 |
| Gastric inhibitory polypeptide receptor                          | GIPR           | P48546           | CHEMBL4383    | Family B G protein-coupled receptor | 0.0          | 5 / 0                 |
| Anandamide amidohydrolase                                        | FAAH           | O00519           | CHEMBL2243    | Enzyme                              | 0.0          | 19 / 0                |
| Serine/threonine-protein kinase AKT2                             | AKT2           | P31751           | CHEMBL2431    | Kinase                              | 0.0          | 5 / 0                 |
| Serine/threonine-protein kinase AKT                              | AKT3           | Q9Y243           | CHEMBL4816    | Kinase                              | 0.0          | 5 / 0                 |
| Transient receptor potential cation channel subfamily M member 8 | TRPM8          | Q7Z2W7           | CHEMBL1075319 | Voltage-gated ion channel           | 0.0          | 26 / 0                |
| Integrin alpha-4/beta-1                                          | ITGB1<br>ITGA4 | P05556<br>P13612 | CHEMBL1907599 | Membrane receptor                   | 0.0          | 9 / 0                 |
| Liver glycogen phosphorylase                                     | PYGL           | P06737           | CHEMBL2568    | Enzyme                              | 0.0          | 3 / 0                 |
| Serine/threonine-protein kinase PIM1                             | PIM1           | P11309           | CHEMBL2147    | Kinase                              | 0.0          | 9 / 0                 |
| Peroxisome proliferator-activated receptor gamma                 | PPARG          | P37231           | CHEMBL235     | Nuclear receptor                    | 0.0          | 66 / 0                |
| Peroxisome proliferator-activated receptor alpha                 | PPARA          | Q07869           | CHEMBL239     | Nuclear receptor                    | 0.0          | 17 / 0                |
| Serine/threonine-protein kinase PIM2                             | PIM2           | Q9P1W9           | CHEMBL4523    | Kinase                              | 0.0          | 7 / 0                 |
| Phosphodiesterase 10A (by homology)                              | PDE10A         | Q9Y233           | CHEMBL4409    | Phosphodiesterase                   | 0.0          | 16 / 0                |
| Receptor protein-tyrosine kinase erbB-2                          | ERBB2          | P04626           | CHEMBL1824    | Kinase                              | 0.0          | 15 / 0                |
| Nerve growth factor receptor Trk-A                               | NTRK1          | P04629           | CHEMBL2815    | Kinase                              | 0.0          | 30 / 0                |
| Neurokinin 1 receptor                                            | TACR1          | P25103           | CHEMBL249     | Family A G protein-coupled receptor | 0.0          | 155 / 0               |



| Target                                                  | Common name   | Uniprot ID       | ChEMBL ID     | Target Class                        | Probability* | Known actives (3D/2D) |
|---------------------------------------------------------|---------------|------------------|---------------|-------------------------------------|--------------|-----------------------|
| Tyrosine-protein kinase ABL (by homology)               | ABL1          | P00519           | CHEMBL1862    | Kinase                              | 0.0          | 10 / 0                |
| Cyclin T1                                               | CCNT1         | O60563           | CHEMBL2108    | Other cytosolic protein             | 0.0          | 6 / 0                 |
| Thymidine kinase, mitochondrial                         | TK2           | O00142           | CHEMBL4580    | Enzyme                              | 0.0          | 1 / 0                 |
| Serine/threonine-protein kinase B-raf                   | BRAF          | P15056           | CHEMBL5145    | Kinase                              | 0.0          | 43 / 0                |
| Glucokinase regulatory protein                          | GCKR          | Q14397           | CHEMBL1075152 | Enzyme                              | 0.0          | 25 / 0                |
| Histone deacetylase 3                                   | HDAC3         | O15379           | CHEMBL1829    | Eraser                              | 0.0          | 2 / 0                 |
| Cyclin-dependent kinase 2/cyclin E1                     | CCNE1<br>CDK2 | P24864<br>P24941 | CHEMBL1907605 | Kinase                              | 0.0          | 3 / 0                 |
| CDK3/Cyclin E                                           | CCNE1<br>CDK3 | P24864<br>Q00526 | CHEMBL3038471 | Kinase                              | 0.0          | 3 / 0                 |
| Inhibitor of nuclear factor kappa B kinase beta subunit | IKBKB         | O14920           | CHEMBL1991    | Kinase                              | 0.0          | 2 / 0                 |
| c-Jun N-terminal kinase 3                               | MAPK10        | P53779           | CHEMBL2637    | Kinase                              | 0.0          | 8 / 0                 |
| Inhibitor of NF-kappa-B kinase (IKK)                    | CHUK          | O15111           | CHEMBL3476    | Kinase                              | 0.0          | 2 / 0                 |
| 2-acylglycerol O-acyltransferase 2                      | MOGAT2        | Q3SYC2           | CHEMBL2439944 | Transferase                         | 0.0          | 5 / 0                 |
| Kinesin-like protein 1                                  | KIF11         | P52732           | CHEMBL4581    | Other cytosolic protein             | 0.0          | 2 / 0                 |
| Sodium/glucose cotransporter 1                          | SLC5A1        | P13866           | CHEMBL4979    | Electrochemical transporter         | 0.0          | 136 / 0               |
| Hepatocyte growth factor receptor                       | MET           | P08581           | CHEMBL3717    | Kinase                              | 0.0          | 12 / 0                |
| Focal adhesion kinase 1                                 | PTK2          | Q05397           | CHEMBL2695    | Kinase                              | 0.0          | 21 / 0                |
| Mitogen-activated protein kinase kinase kinase 14       | MAP3K14       | Q99558           | CHEMBL5888    | Kinase                              | 0.0          | 22 / 0                |
| Tyrosine-protein kinase JAK3                            | JAK3          | P52333           | CHEMBL2148    | Kinase                              | 0.0          | 11 / 0                |
| Cannabinoid receptor 1 (by homology)                    | CNR1          | P21554           | CHEMBL218     | Family A G protein-coupled receptor | 0.0          | 17 / 0                |
| Cannabinoid receptor 2                                  | CNR2          | P34972           | CHEMBL253     | Family A G protein-coupled receptor | 0.0          | 27 / 0                |
| PI3-kinase p110-delta subunit                           | PIK3CD        | O00329           | CHEMBL3130    | Enzyme                              | 0.0          | 29 / 0                |
| PI3-kinase p110-beta subunit                            | PIK3CB        | P42338           | CHEMBL3145    | Enzyme                              | 0.0          | 27 / 0                |
| Androgen Receptor (by homology)                         | AR            | P10275           | CHEMBL1871    | Nuclear receptor                    | 0.0          | 76 / 0                |
| Metabotropic glutamate receptor 2 (by homology)         | GRM2          | Q14416           | CHEMBL5137    | Family C G protein-coupled receptor | 0.0          | 8 / 0                 |

| Target                      | Common name | Uniprot ID | ChEMBL ID  | Target Class                        | Probability* | Known actives (3D/2D) |
|-----------------------------|-------------|------------|------------|-------------------------------------|--------------|-----------------------|
| Interleukin-8 receptor B    | CXCR2       | P25025     | CHEMBL2434 | Family A G protein-coupled receptor | 0.0          | 2 / 0                 |
| Fructose-1,6-bisphosphatase | FBP1        | P09467     | CHEMBL3975 | Enzyme                              | 0.0          | 9 / 0                 |
| Interleukin-8 receptor A    | CXCR1       | P25024     | CHEMBL4029 | Family A G protein-coupled receptor | 0.0          | 2 / 0                 |
| Vasopressin V2 receptor     | AVPR2       | P30518     | CHEMBL1790 | Family A G protein-coupled receptor | 0.0          | 3 / 0                 |

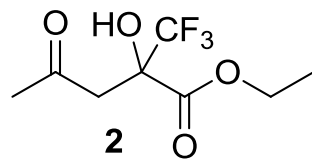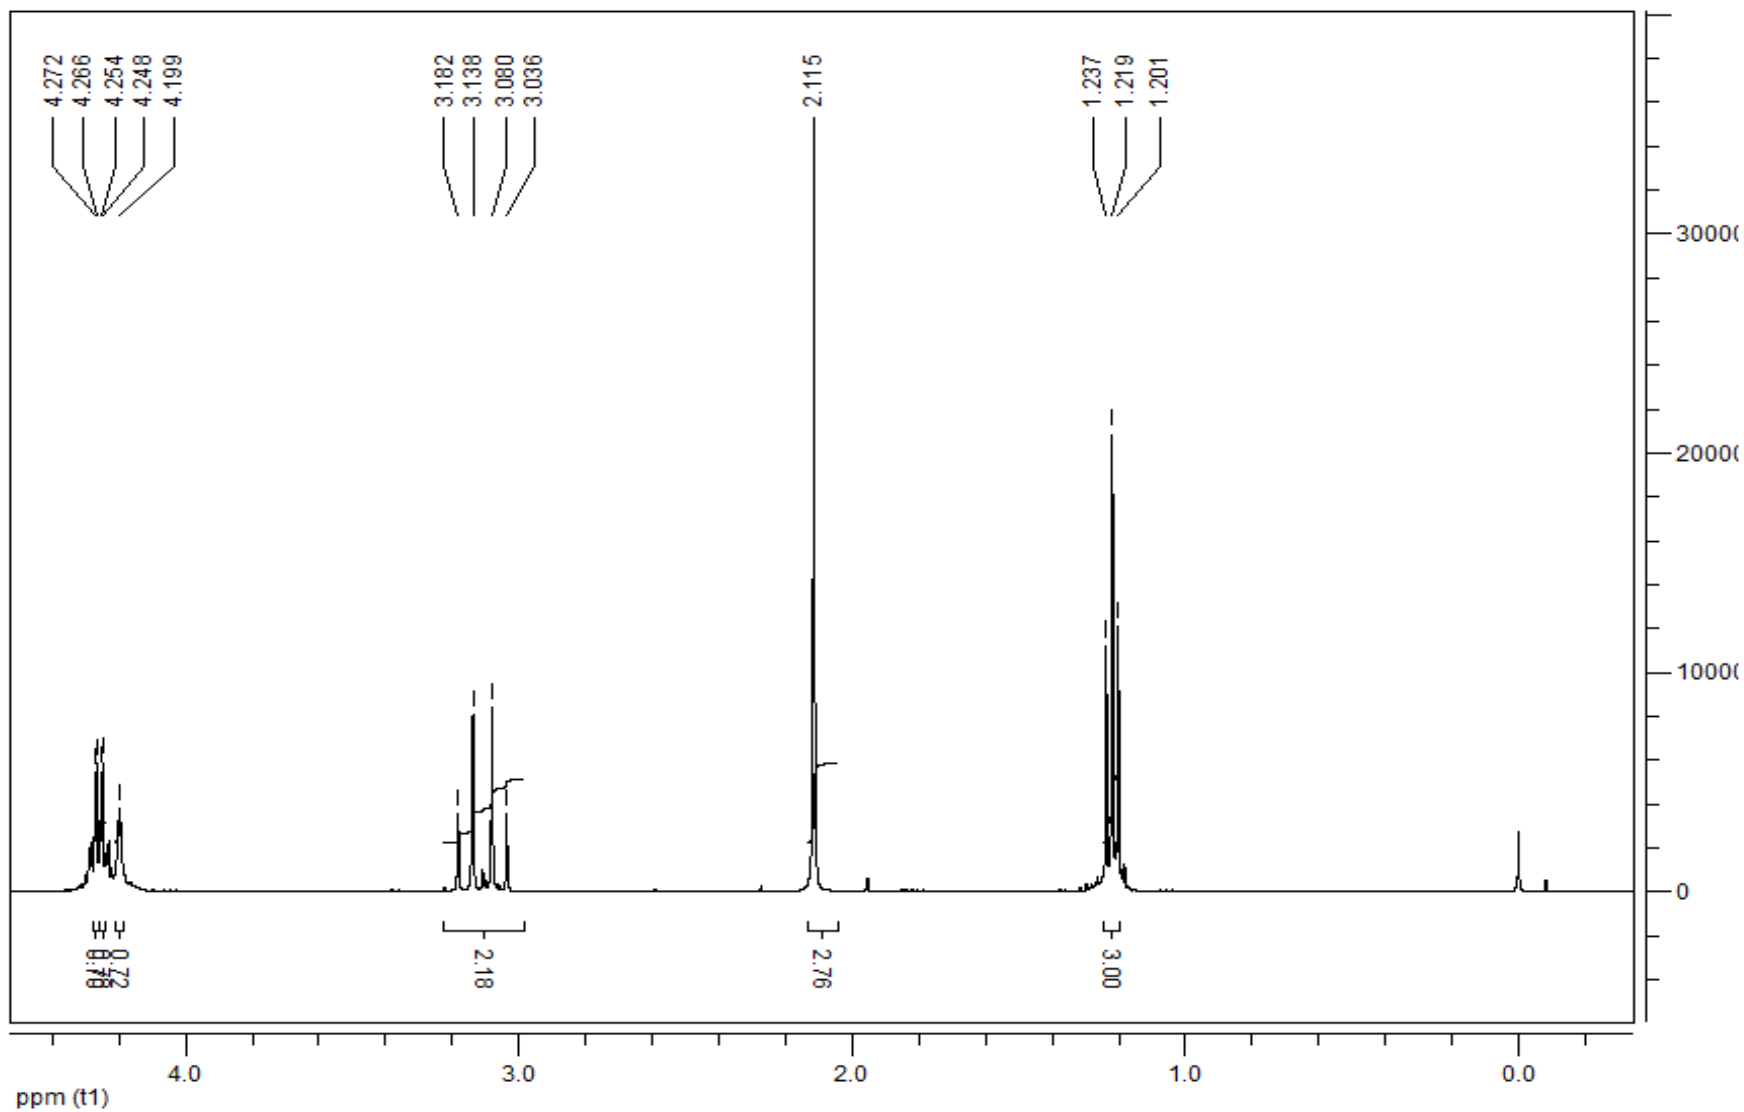

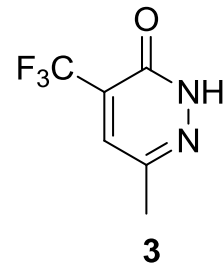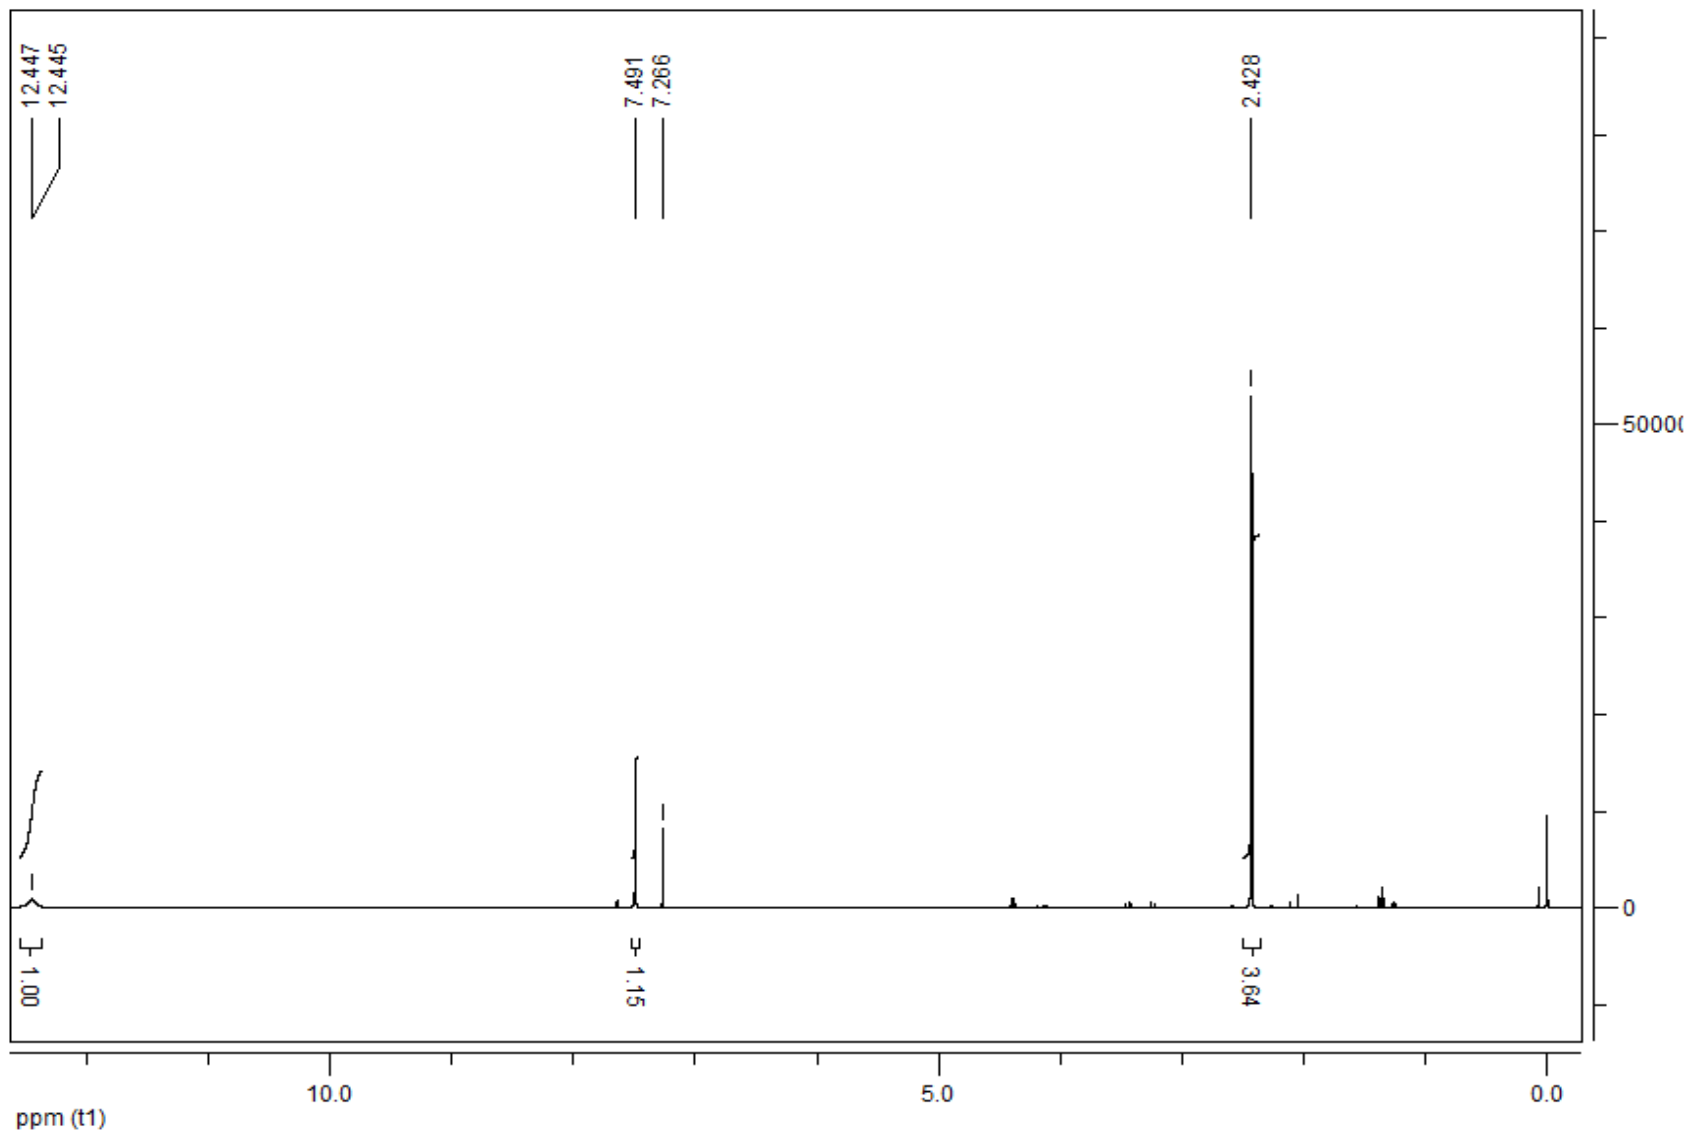

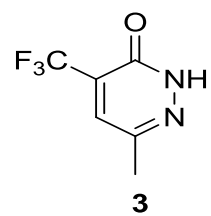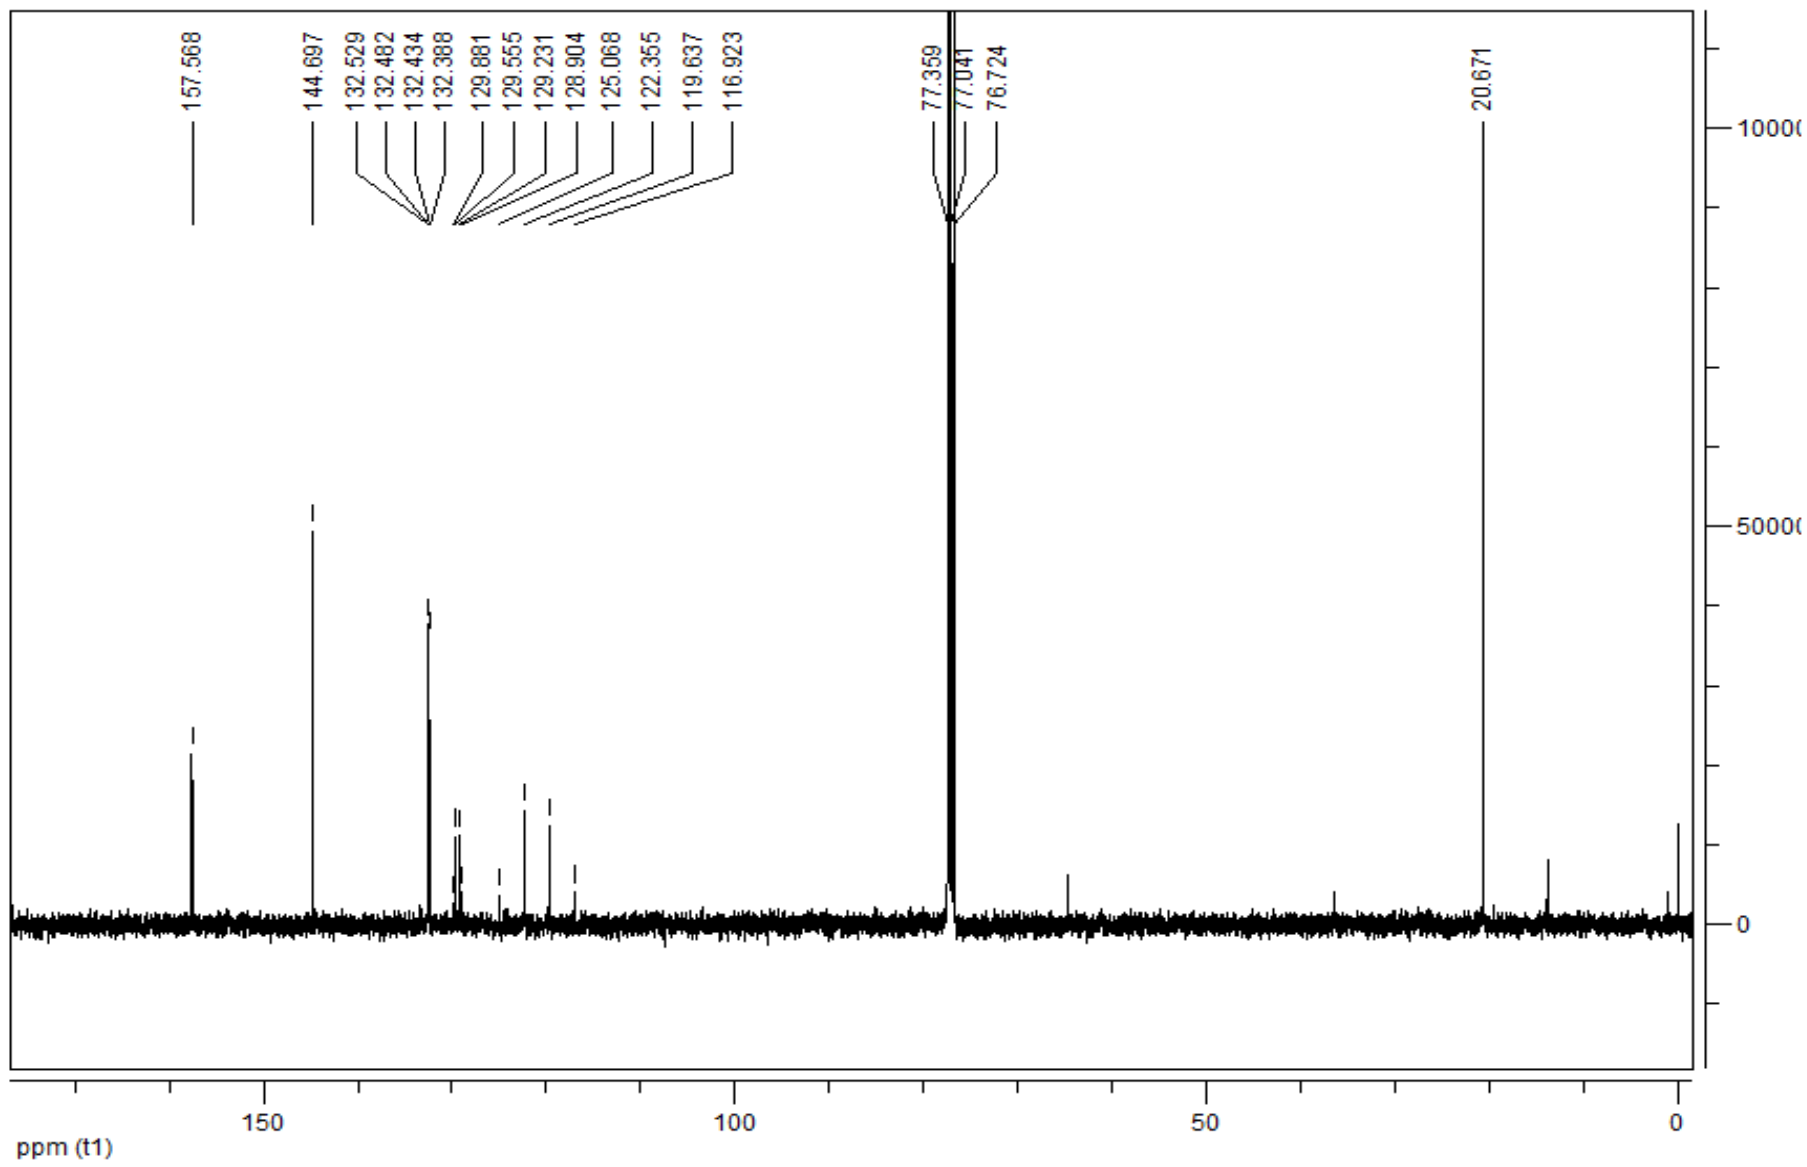

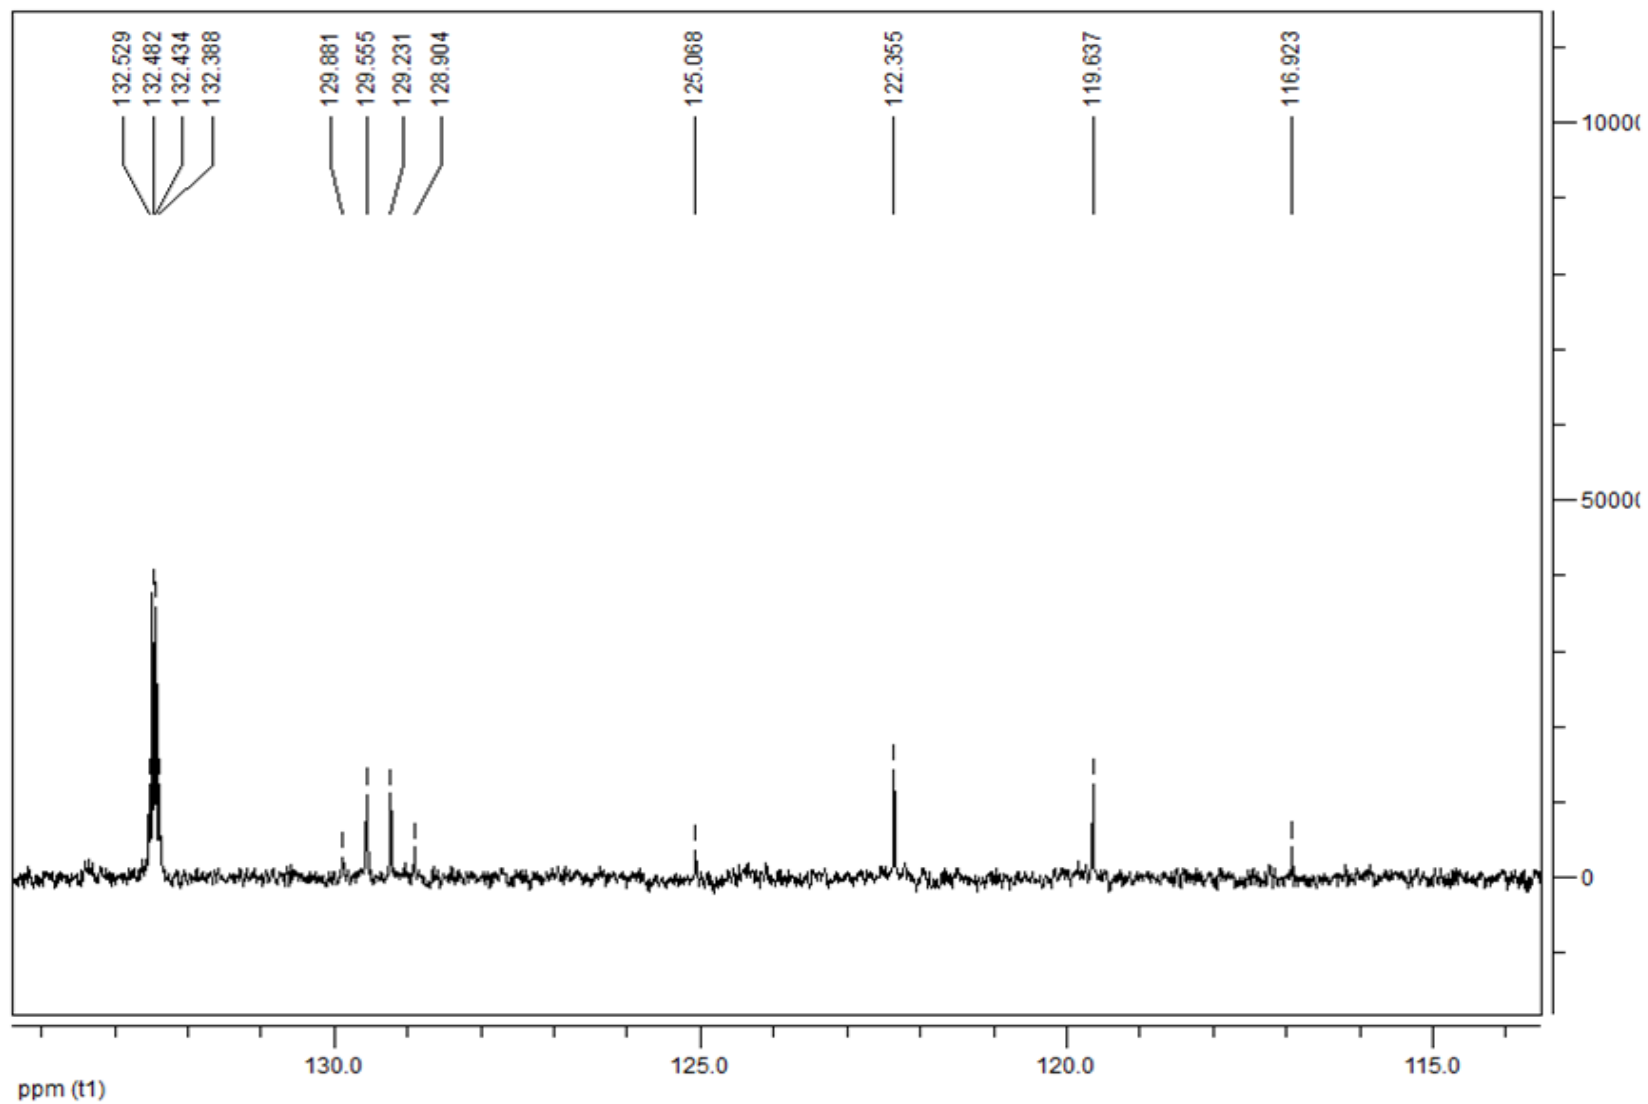

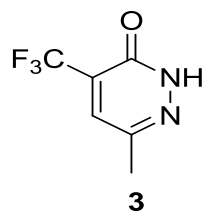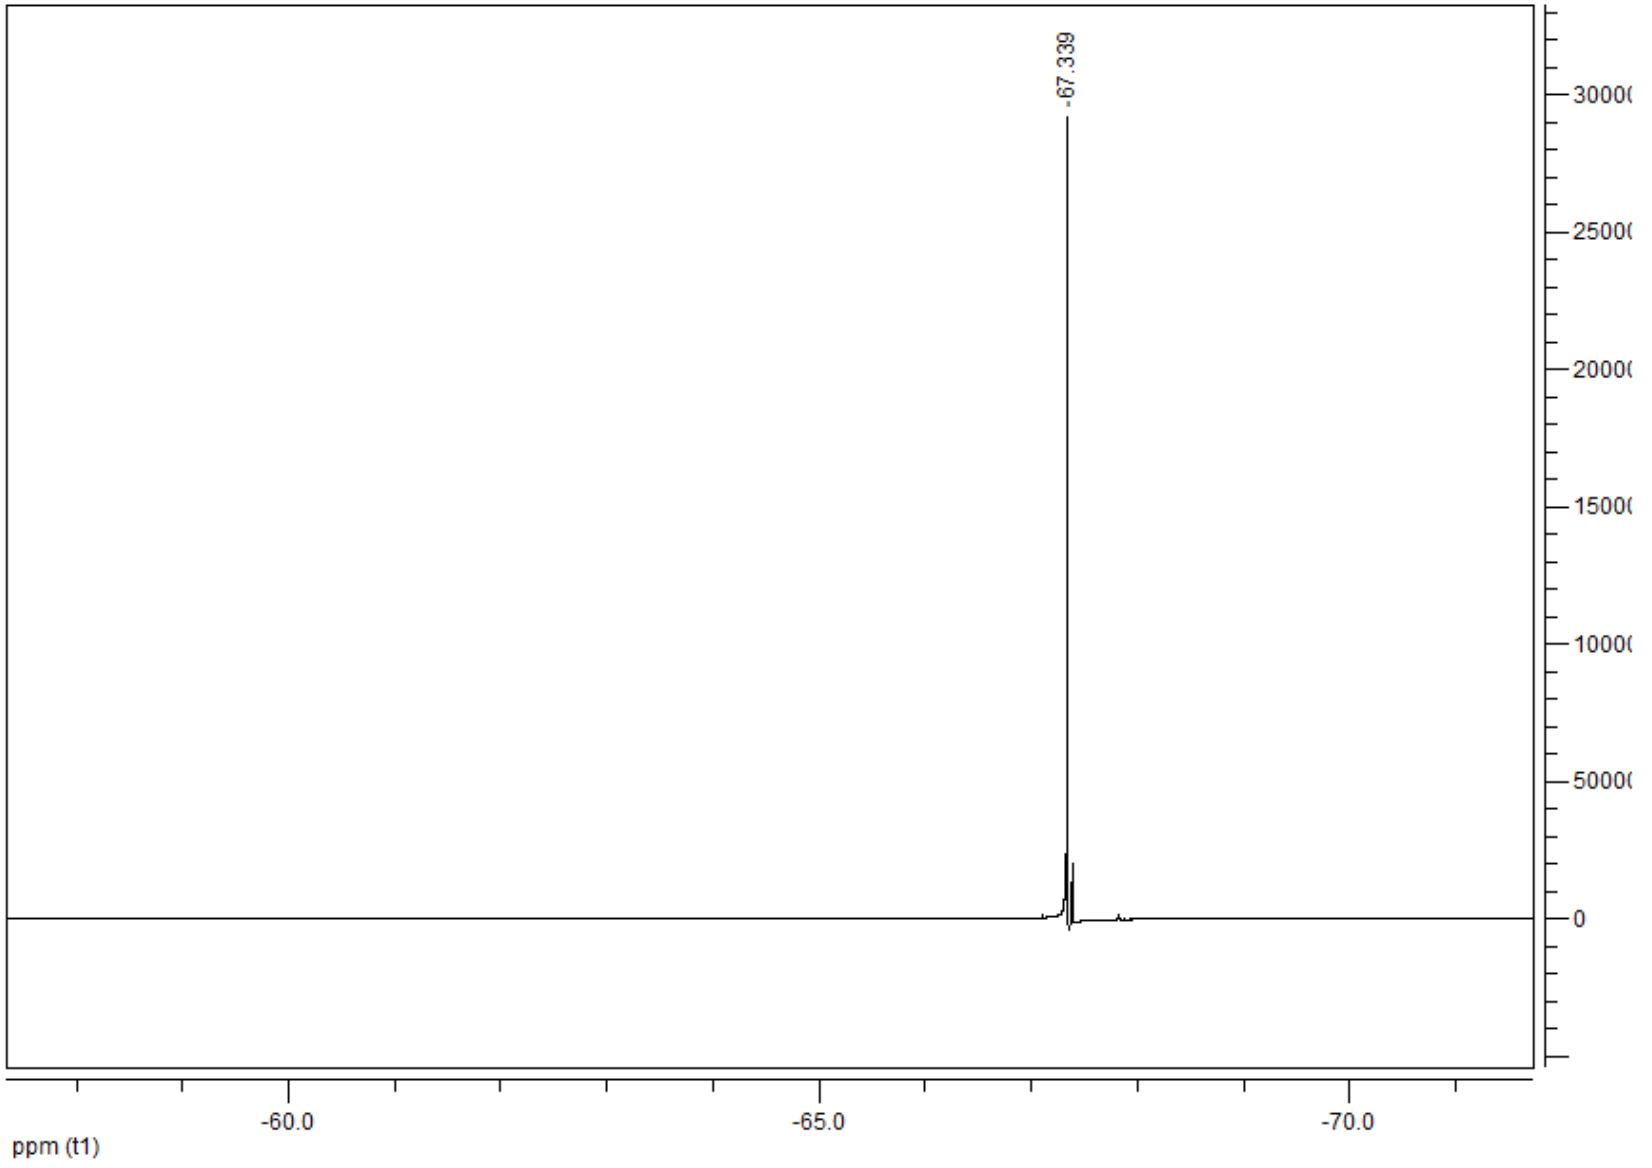

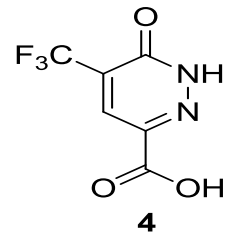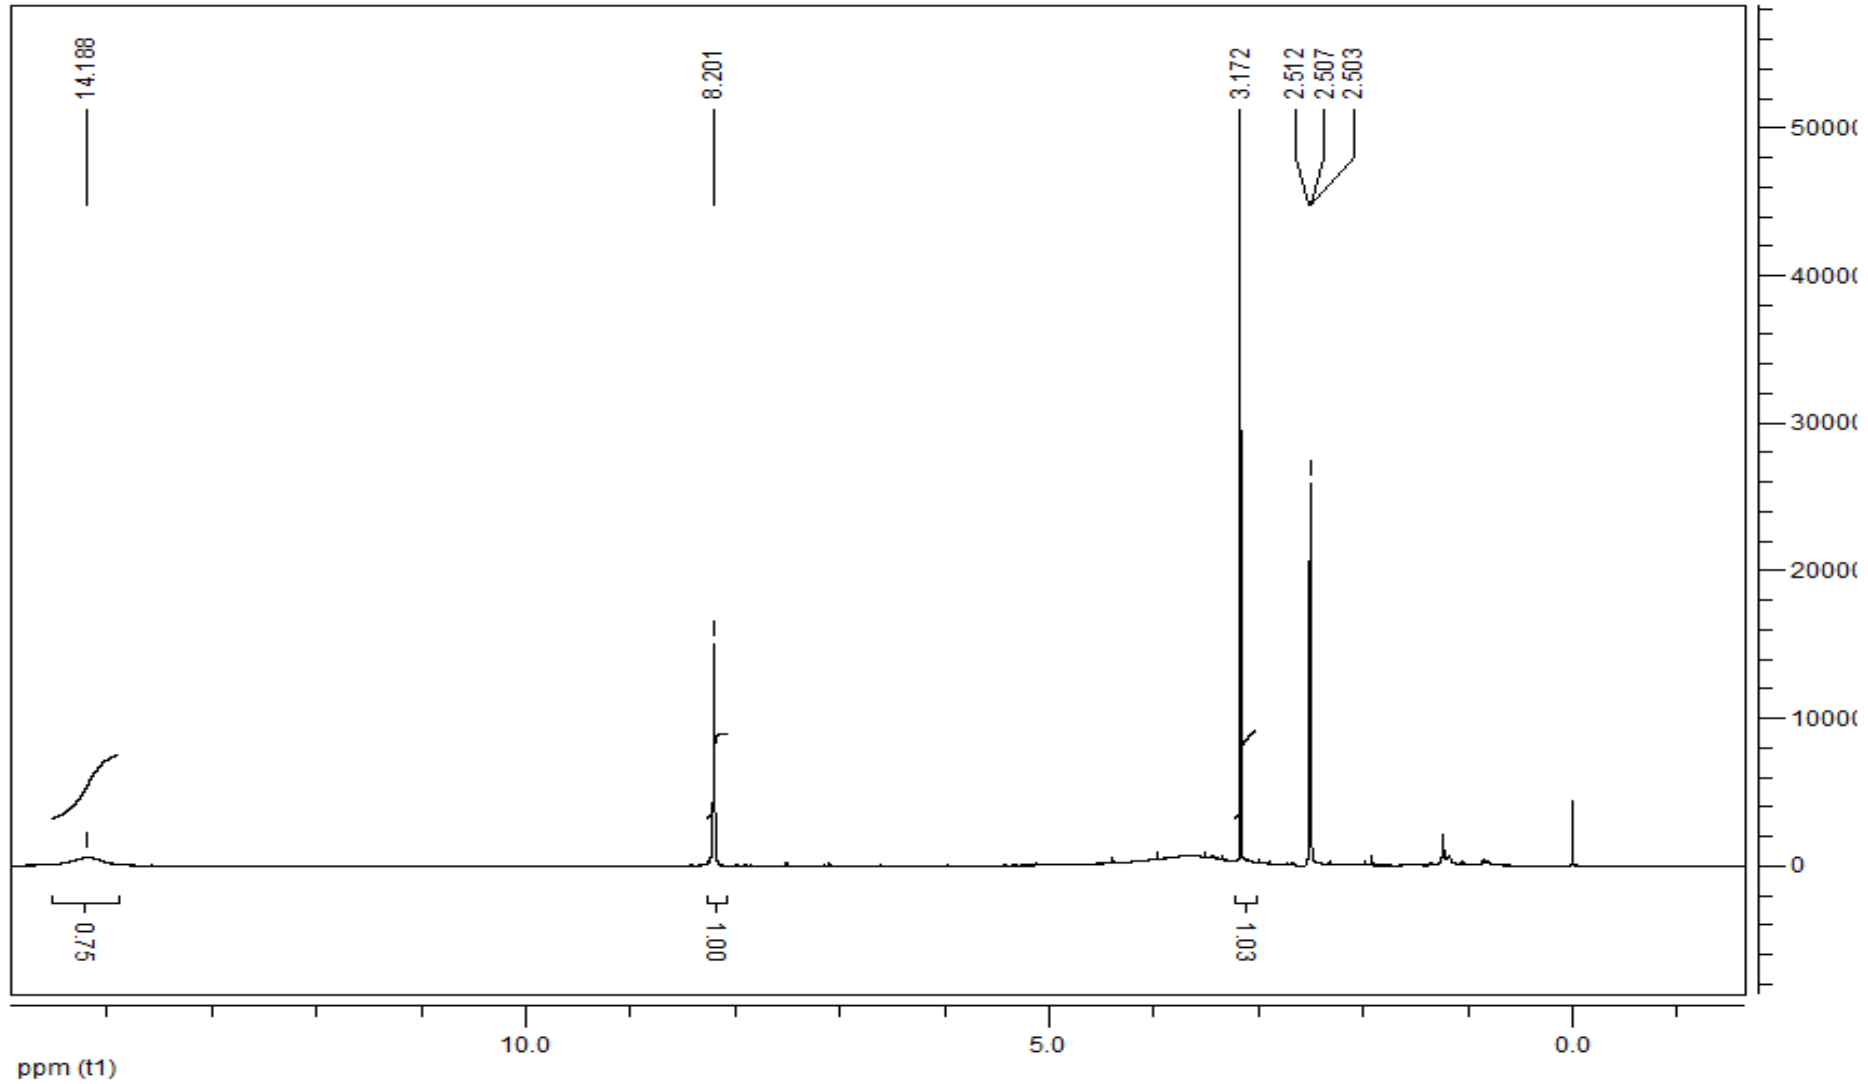



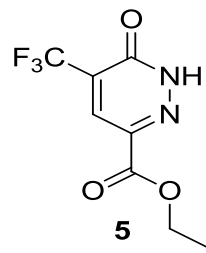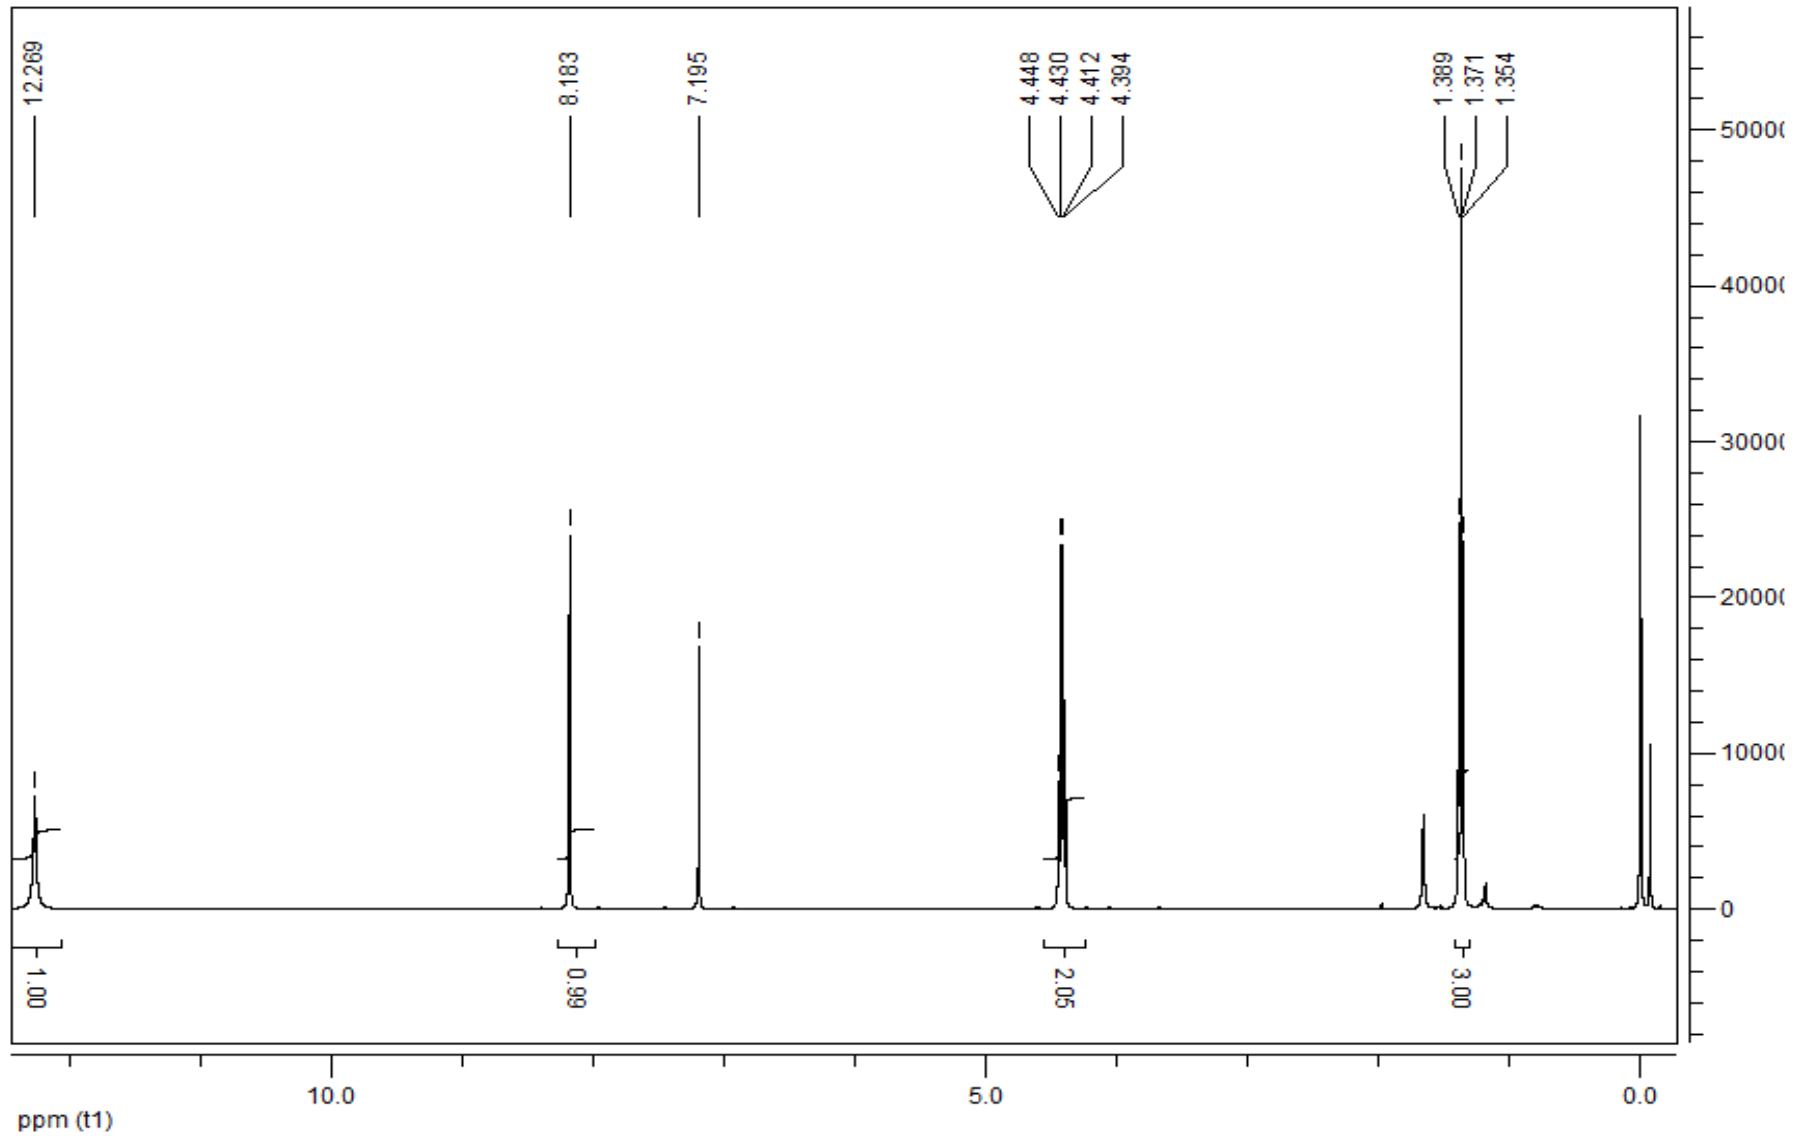

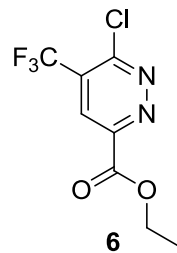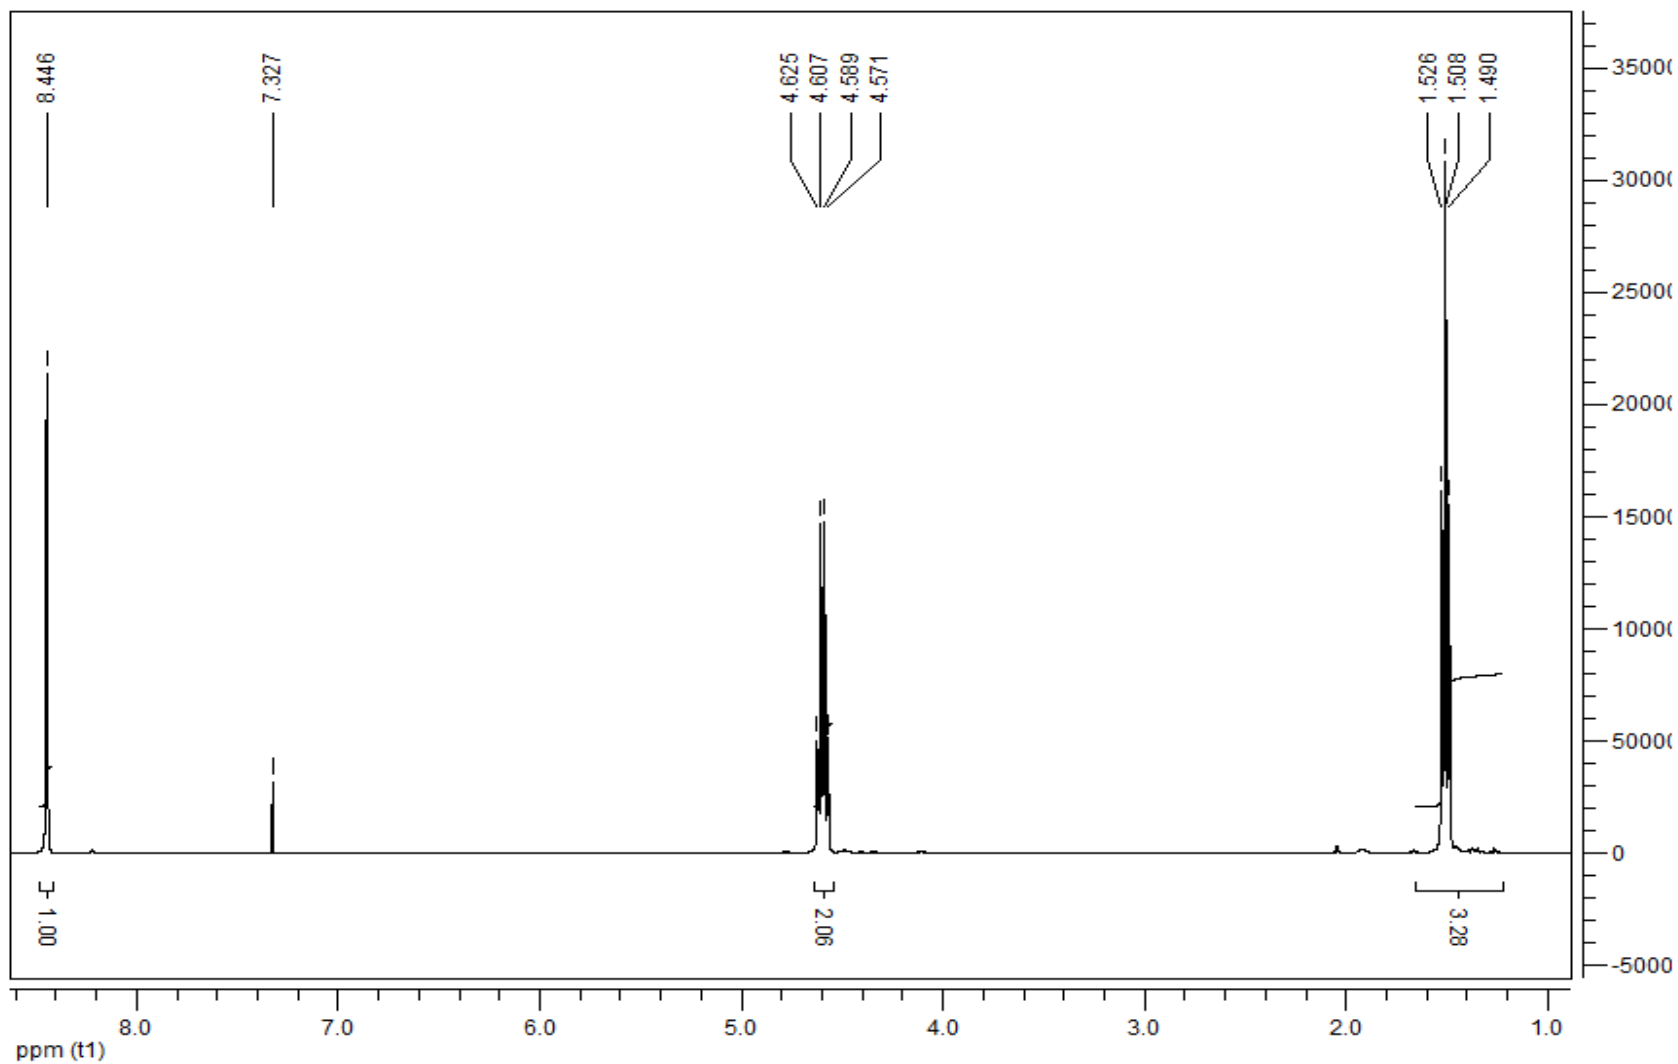

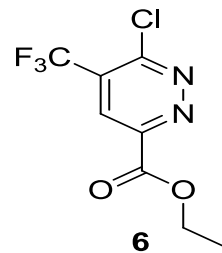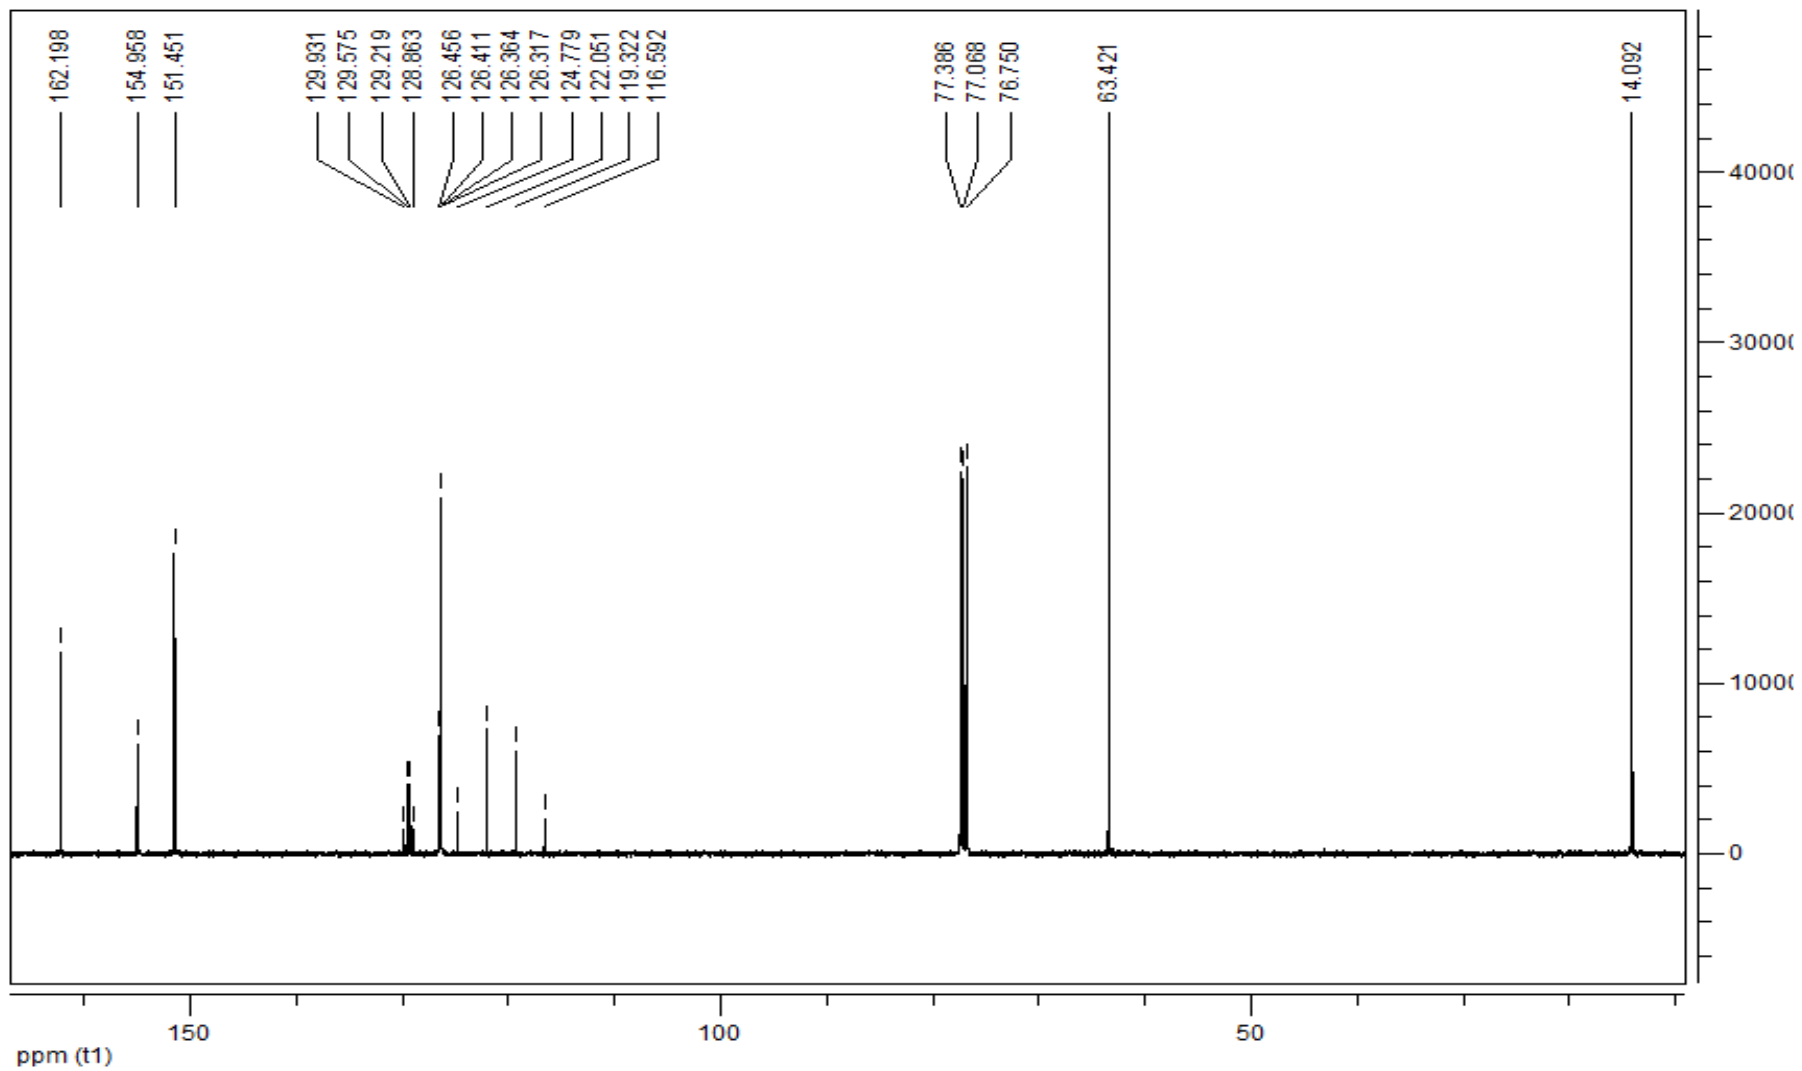

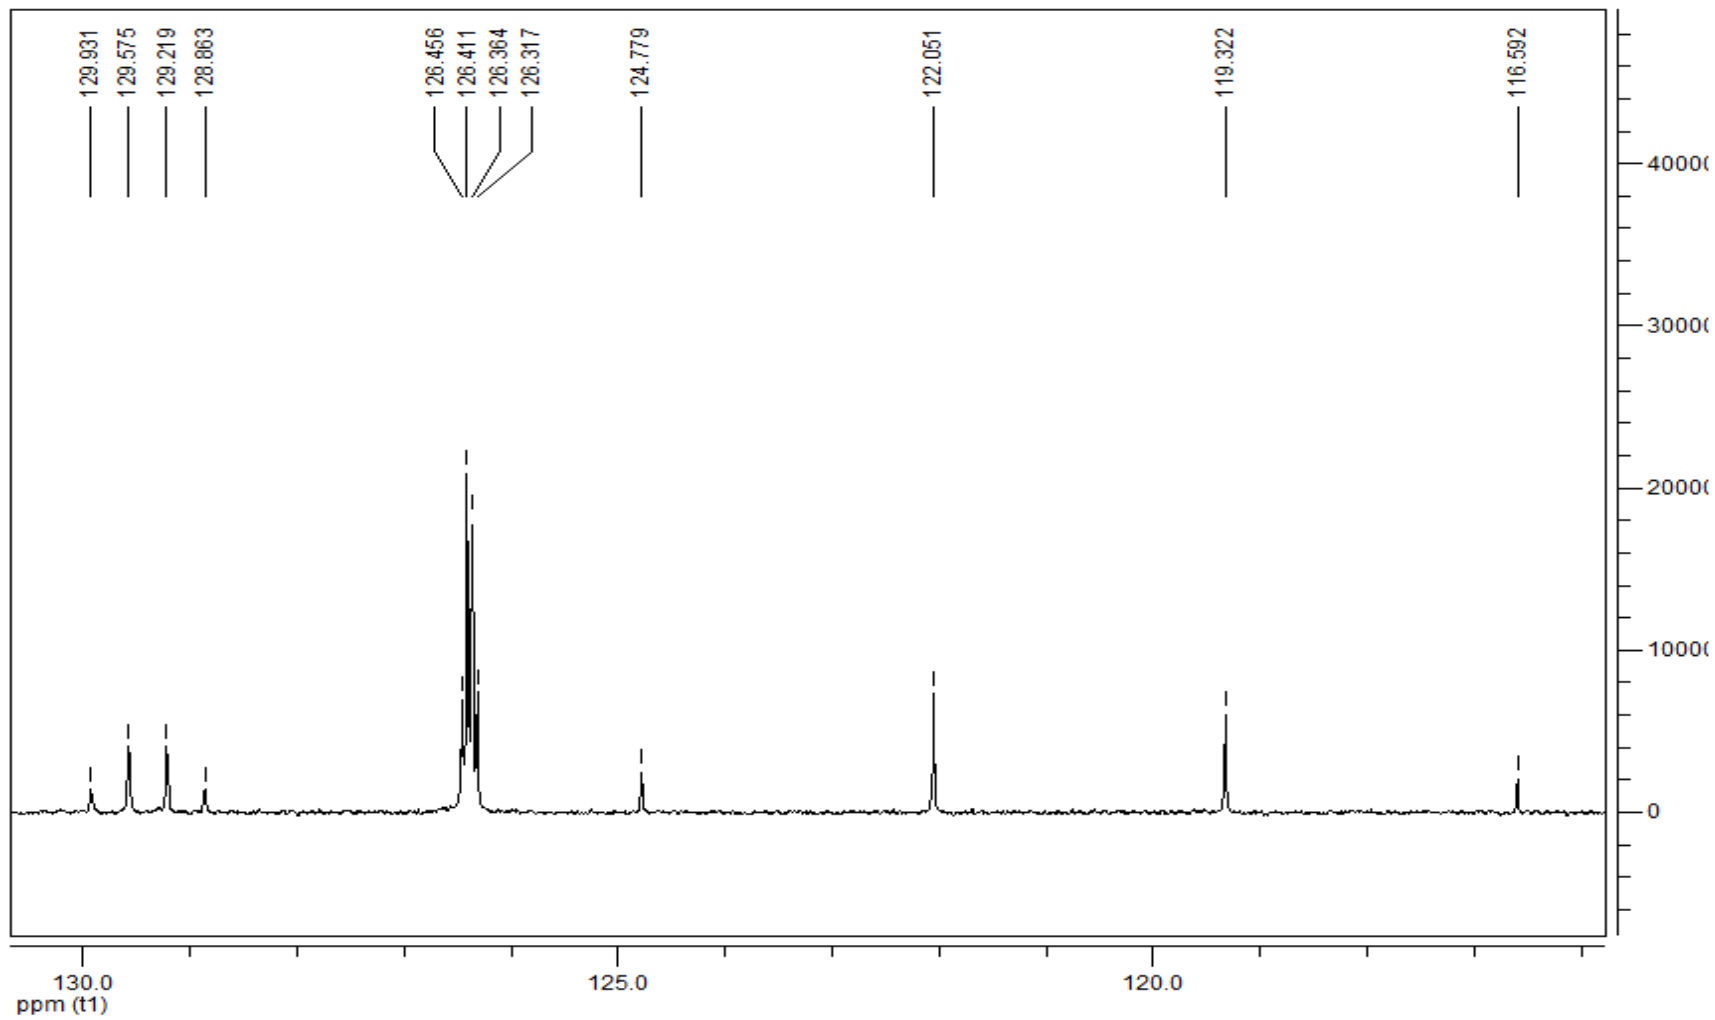

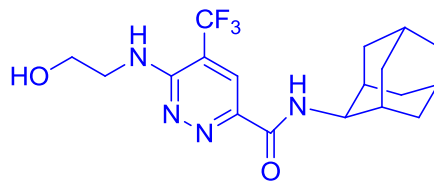

**11a**

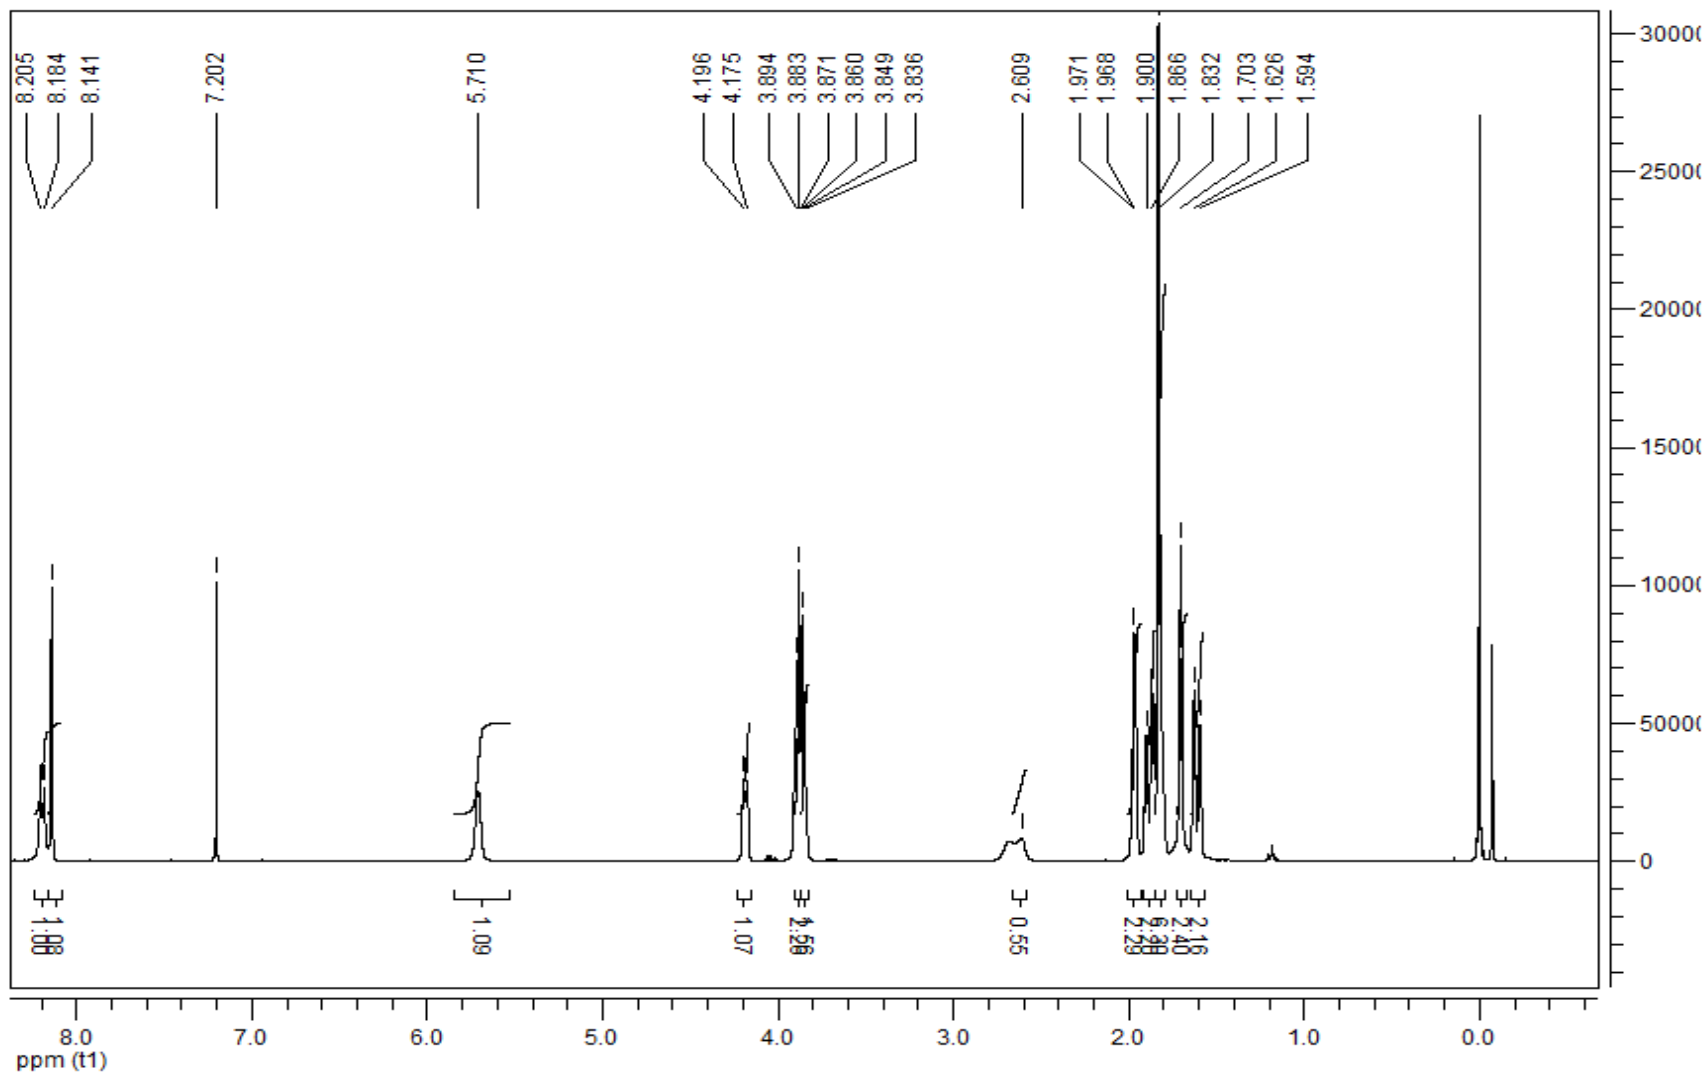

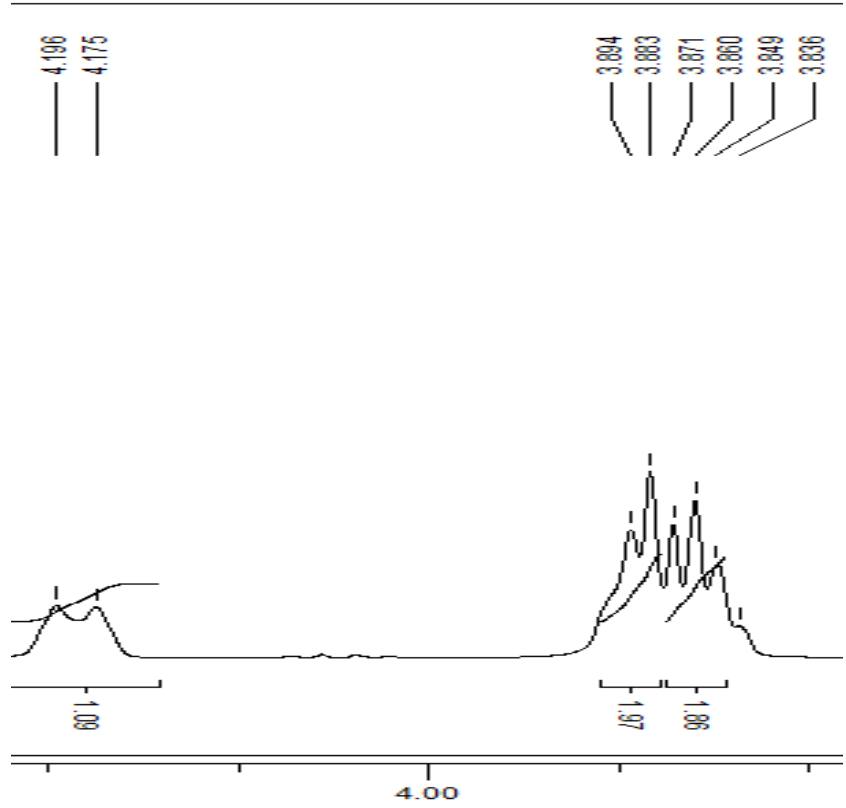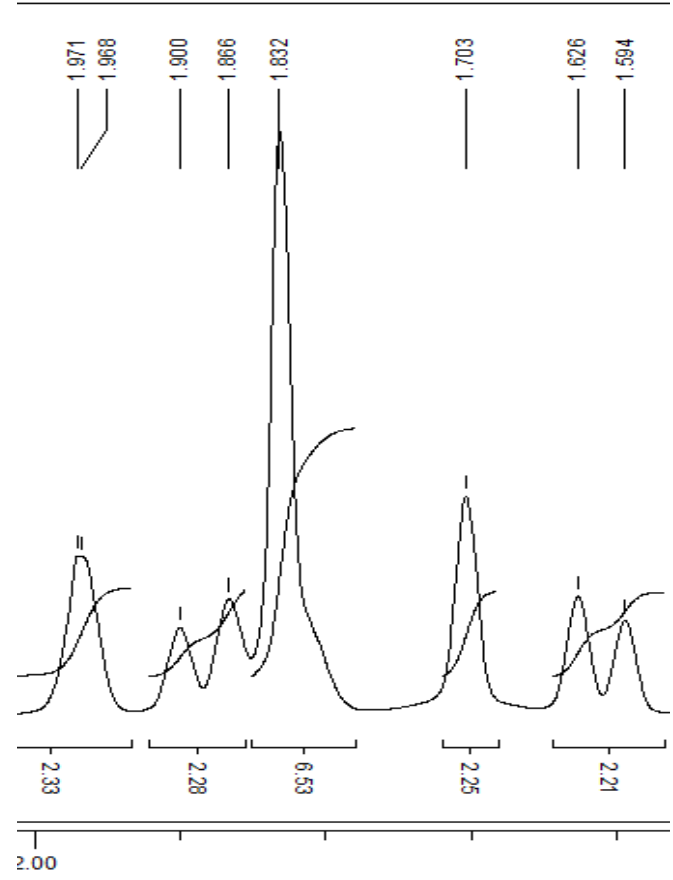

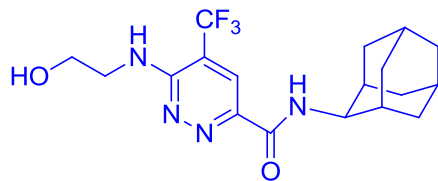

11a

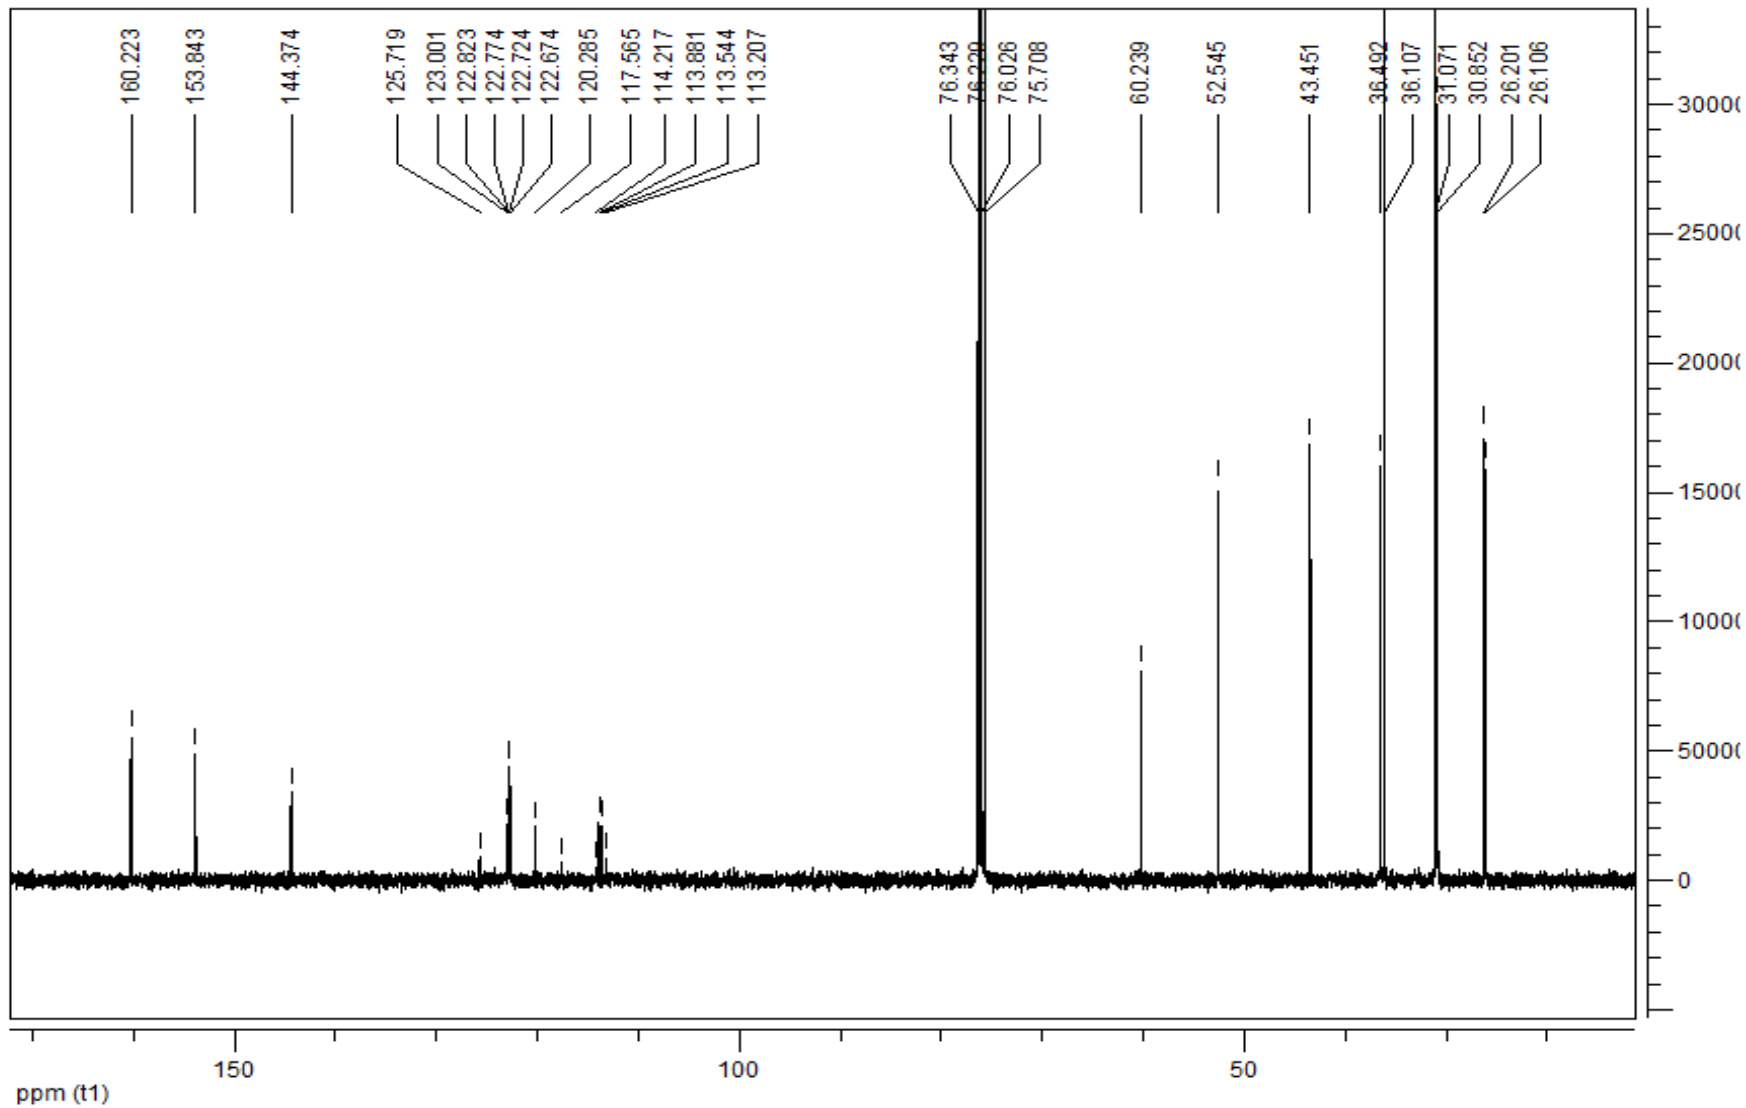

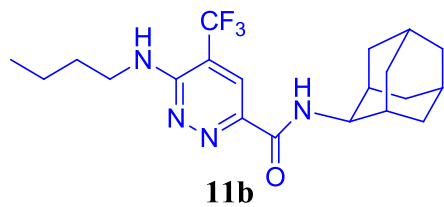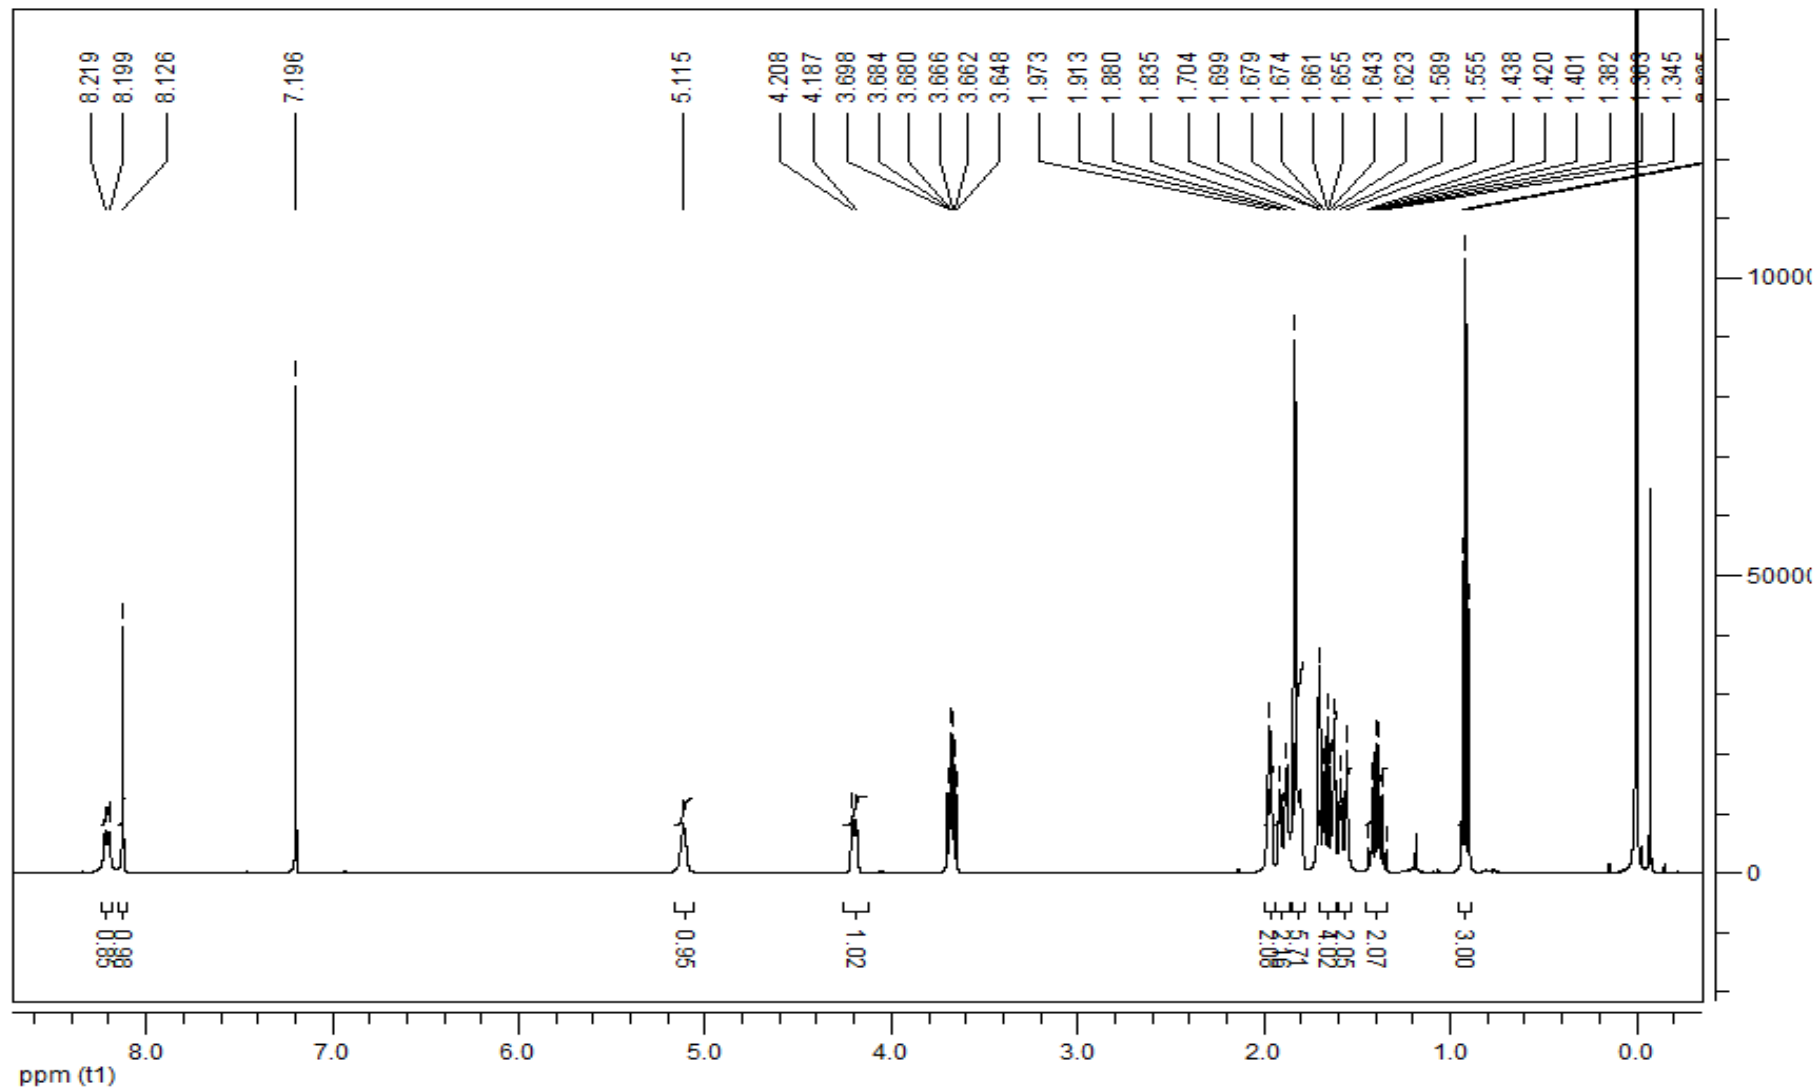



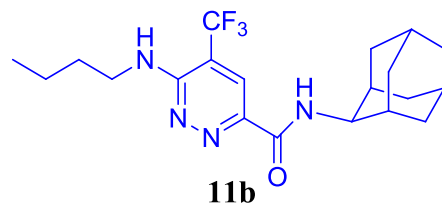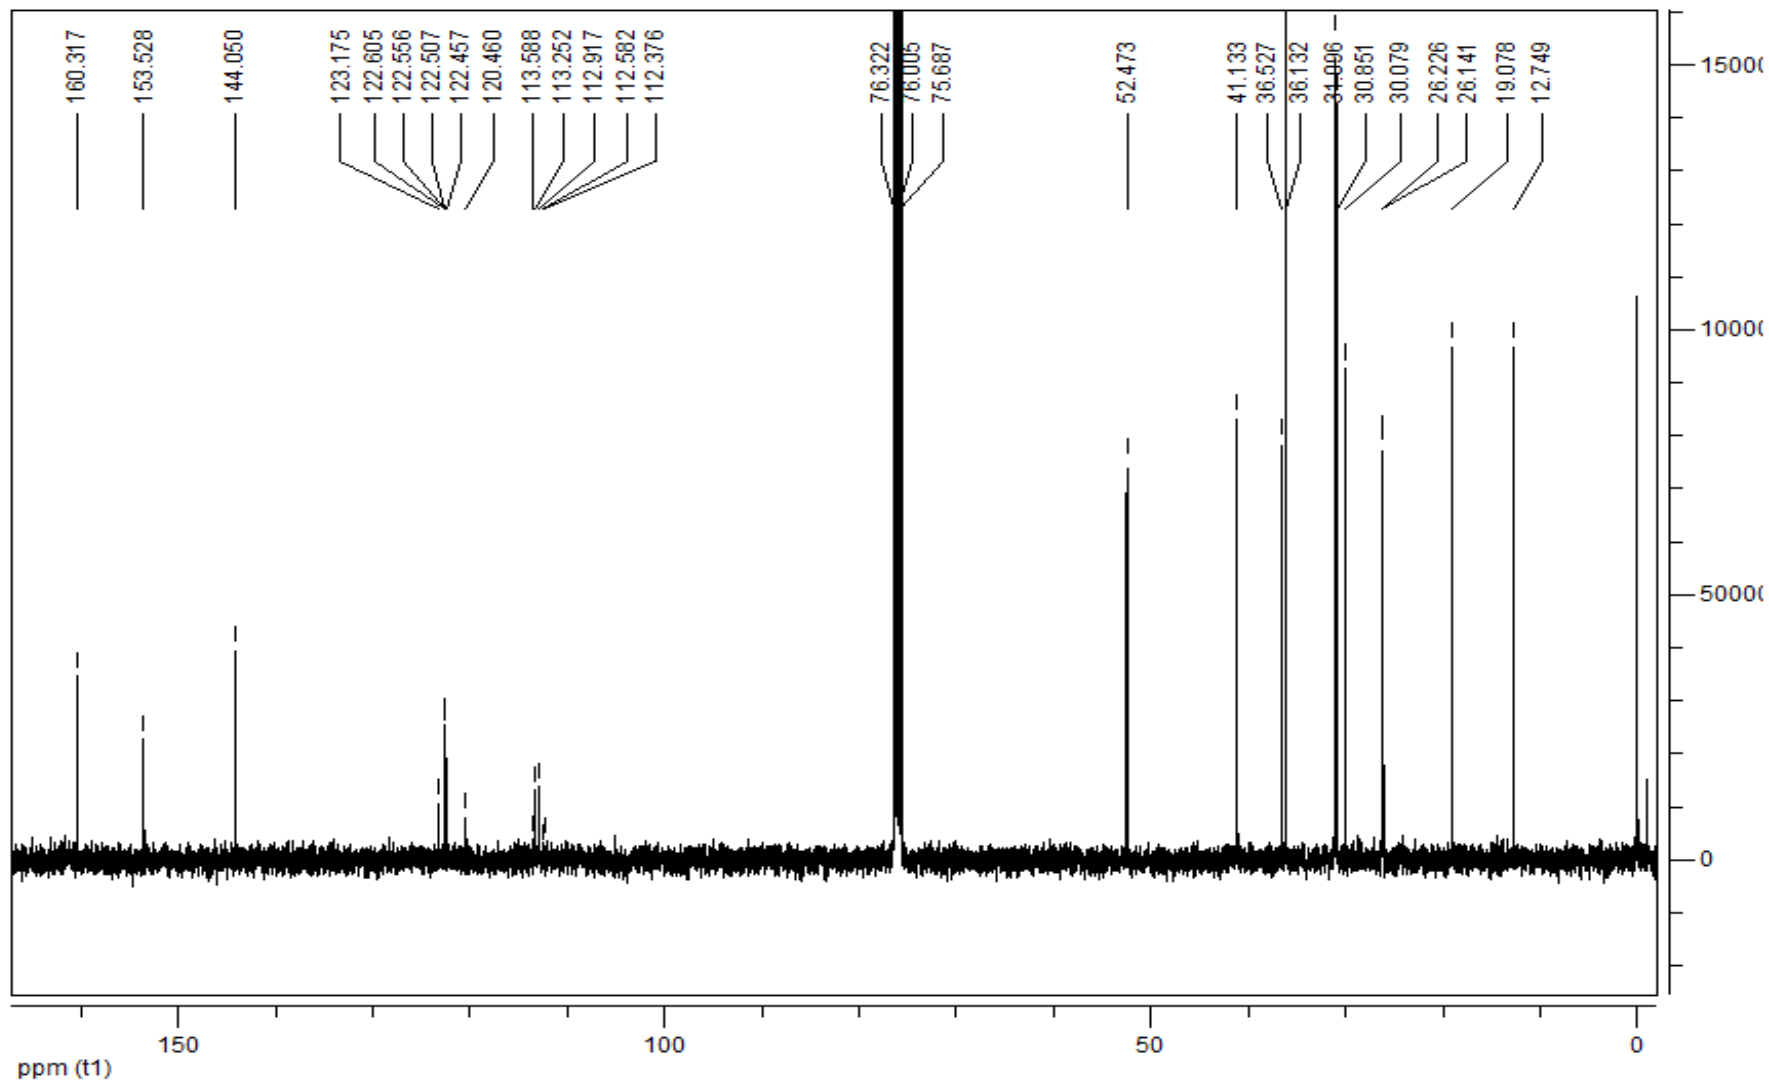



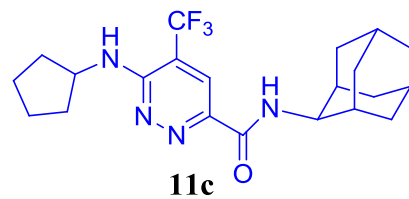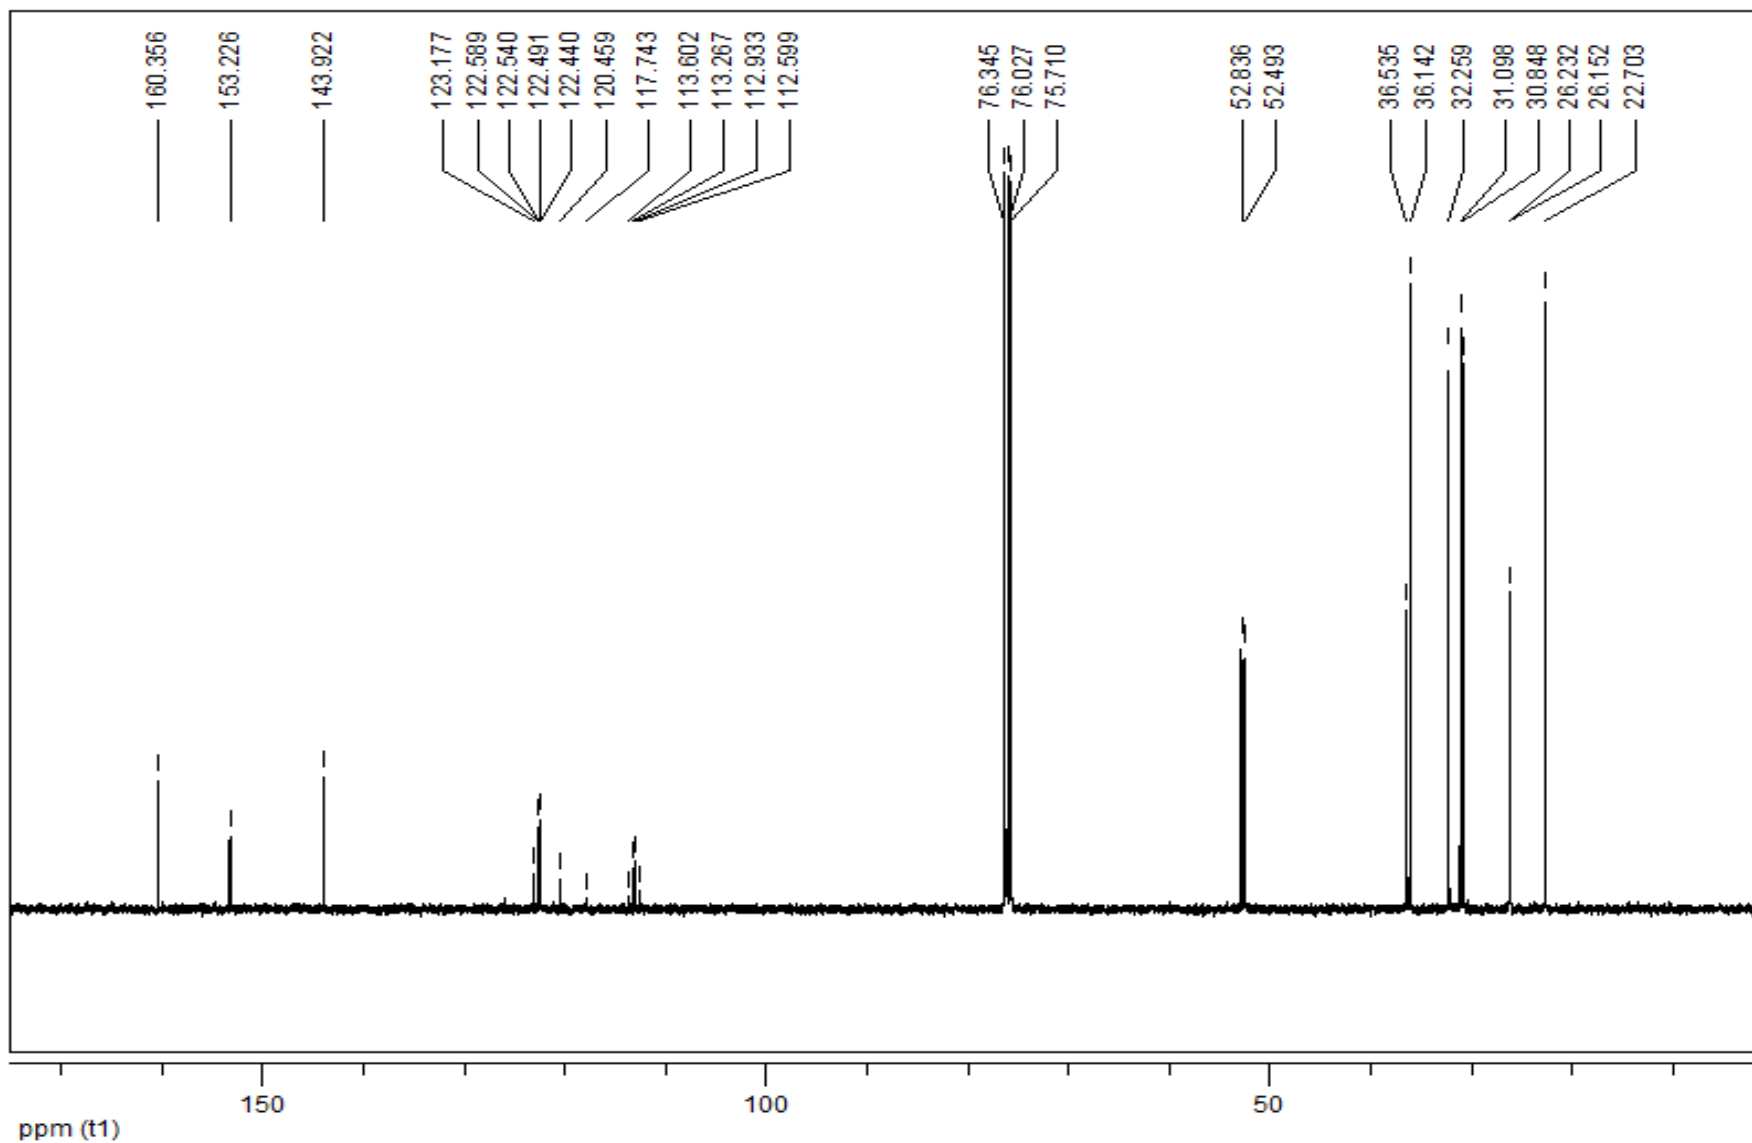

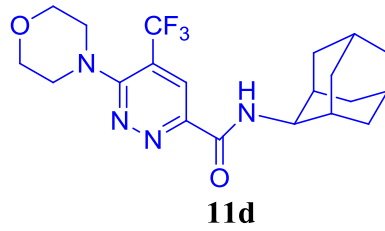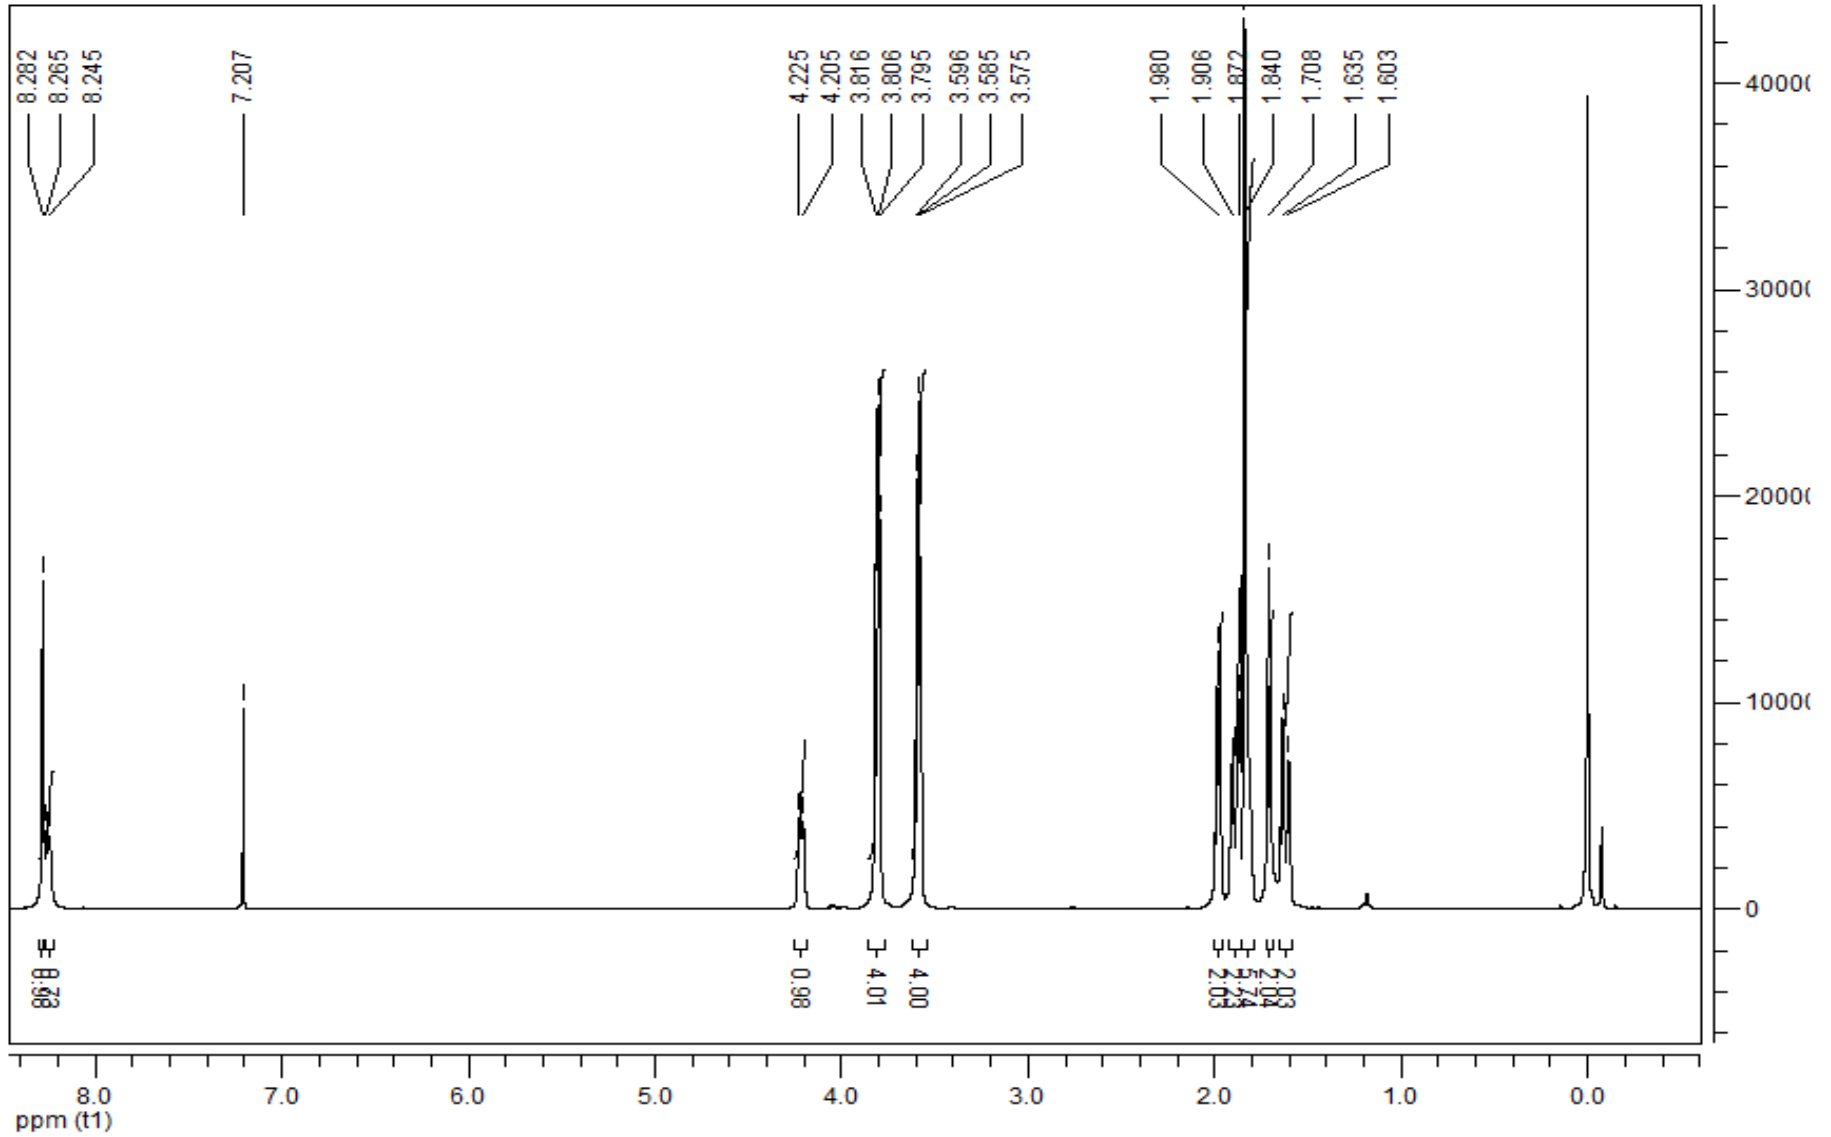

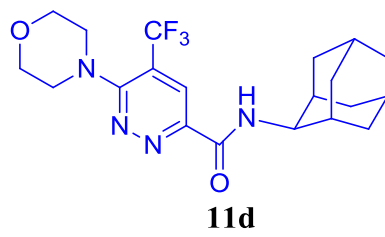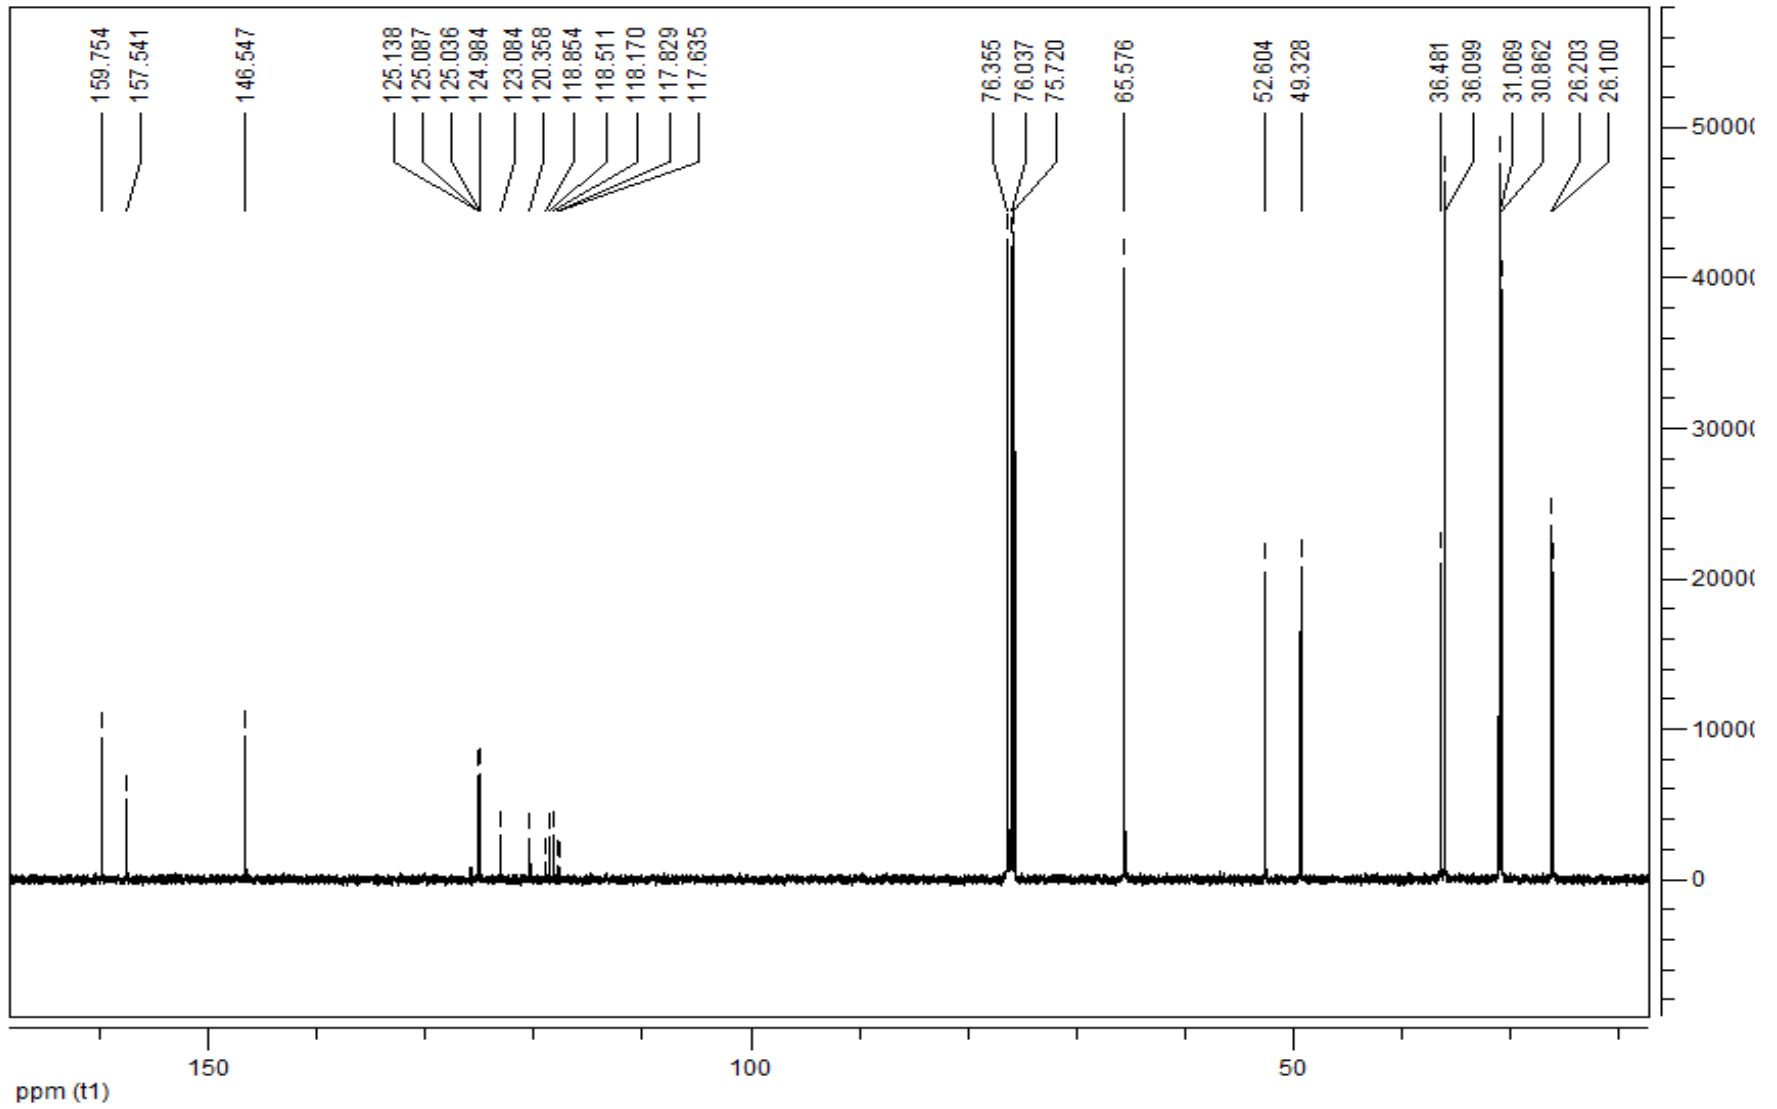



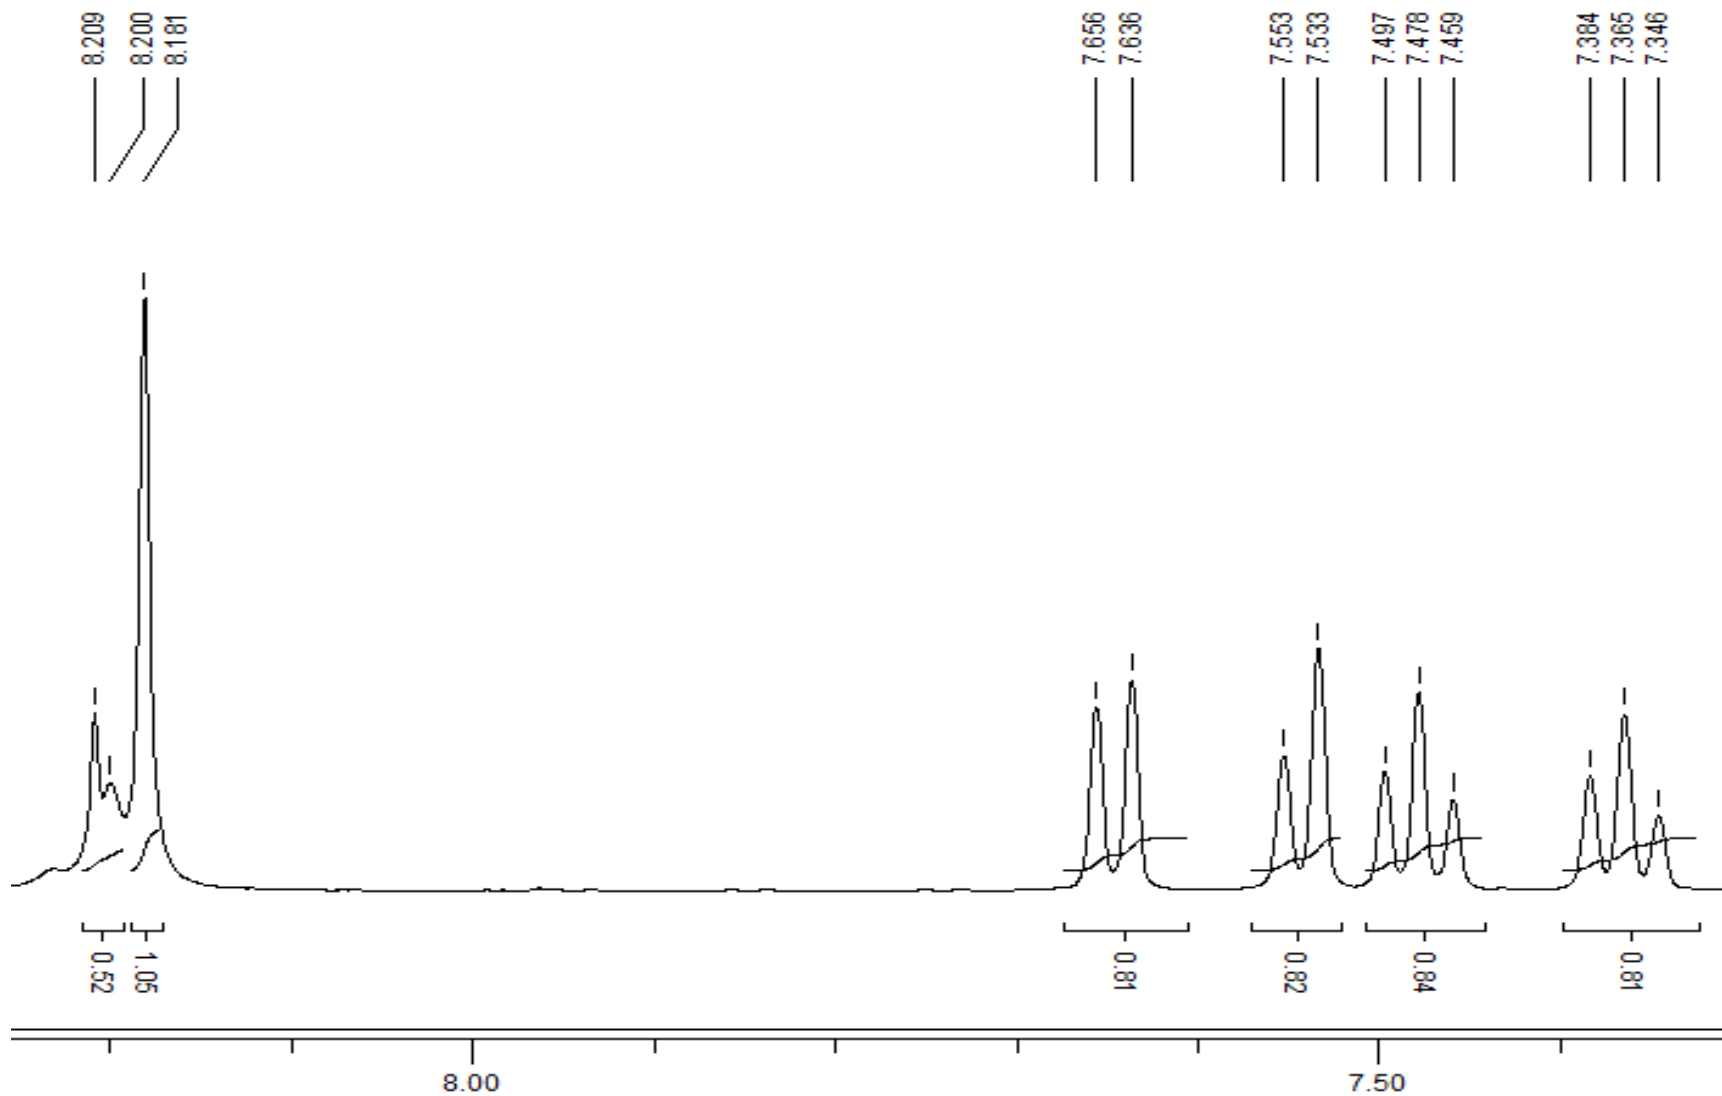

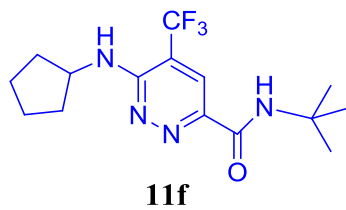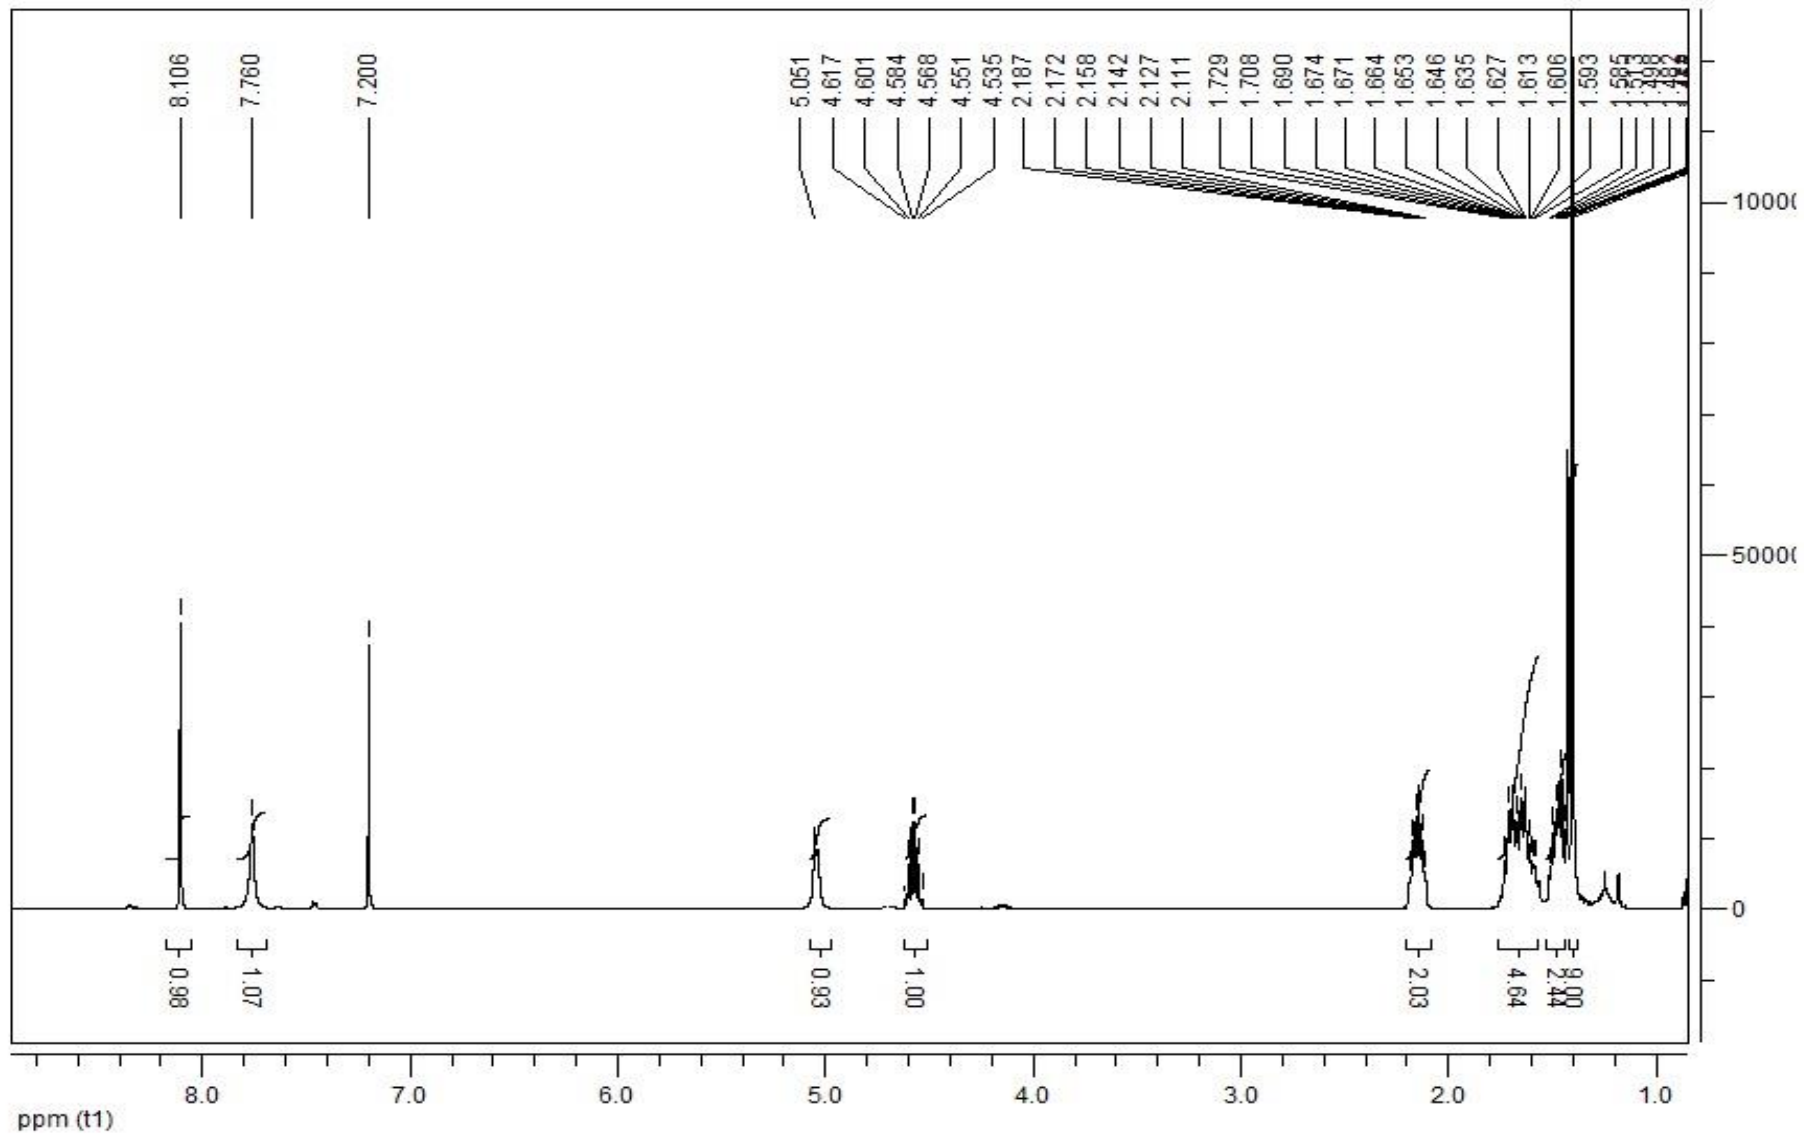



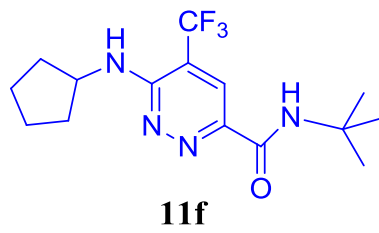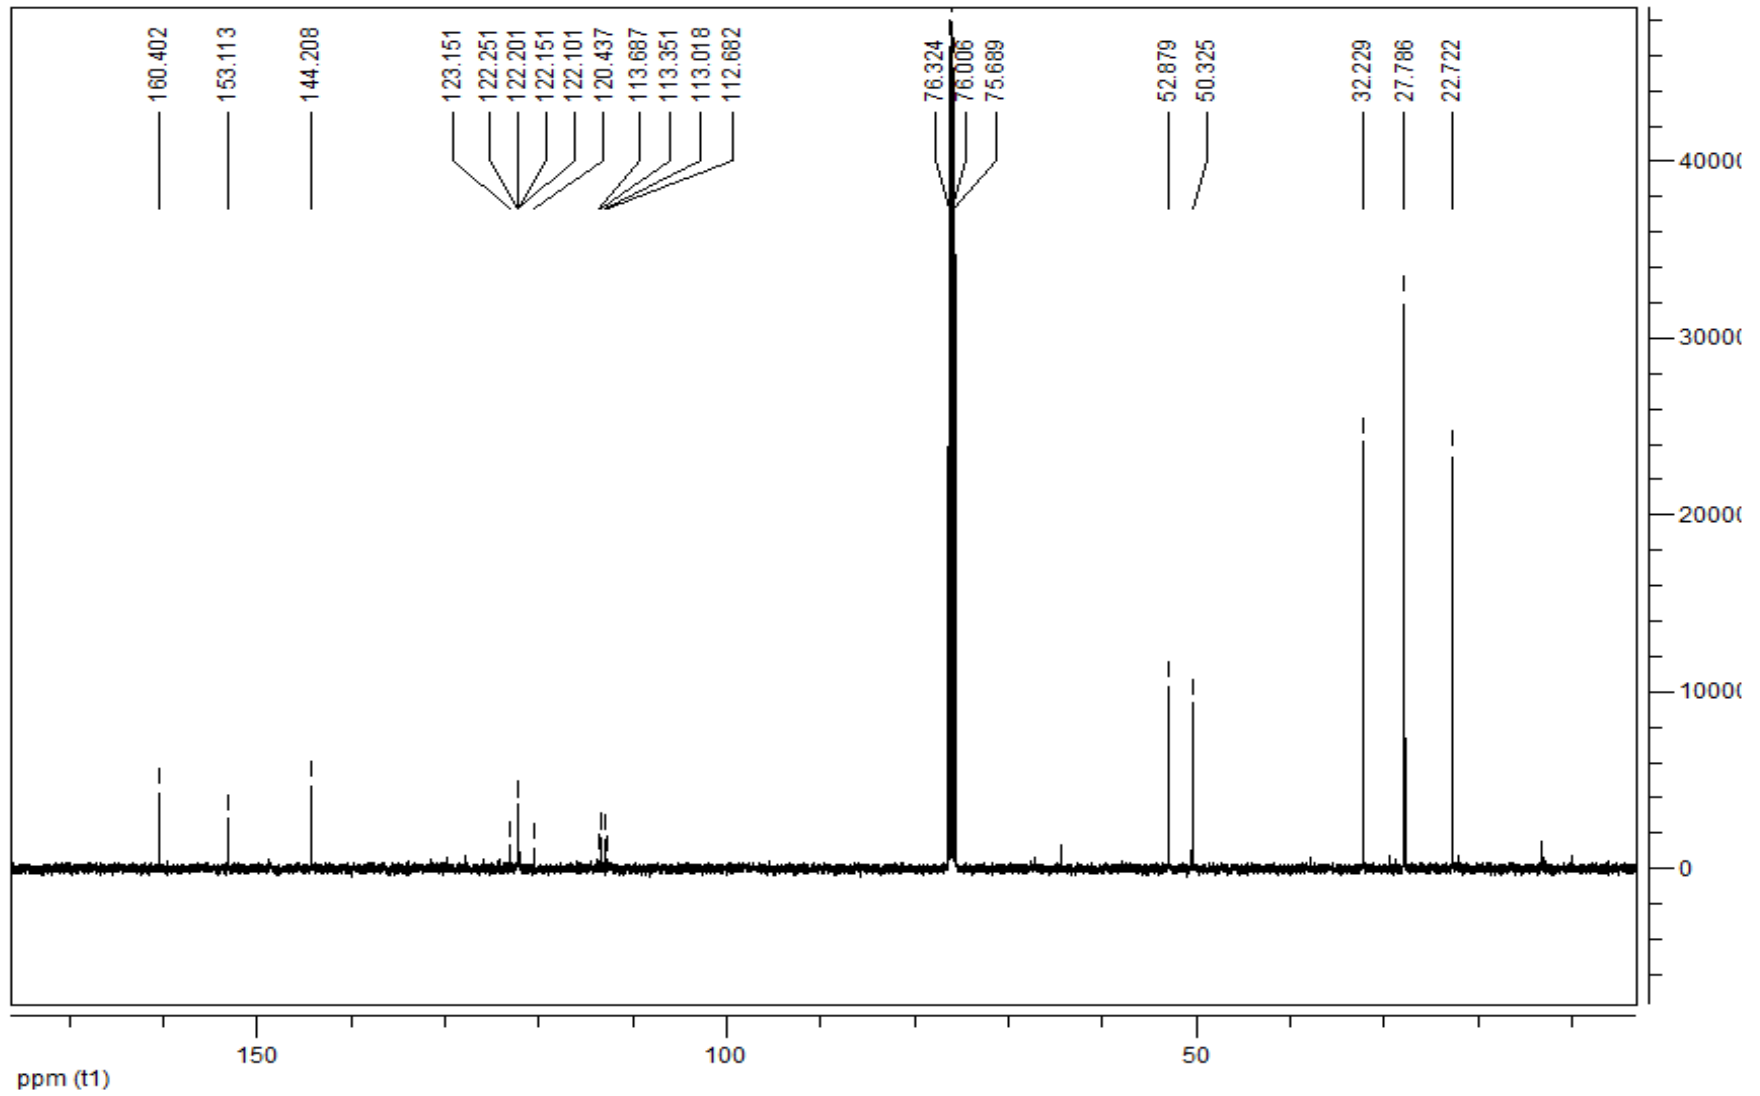

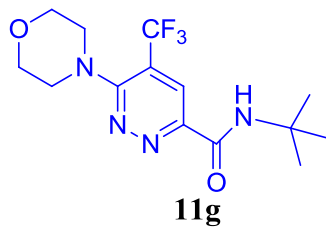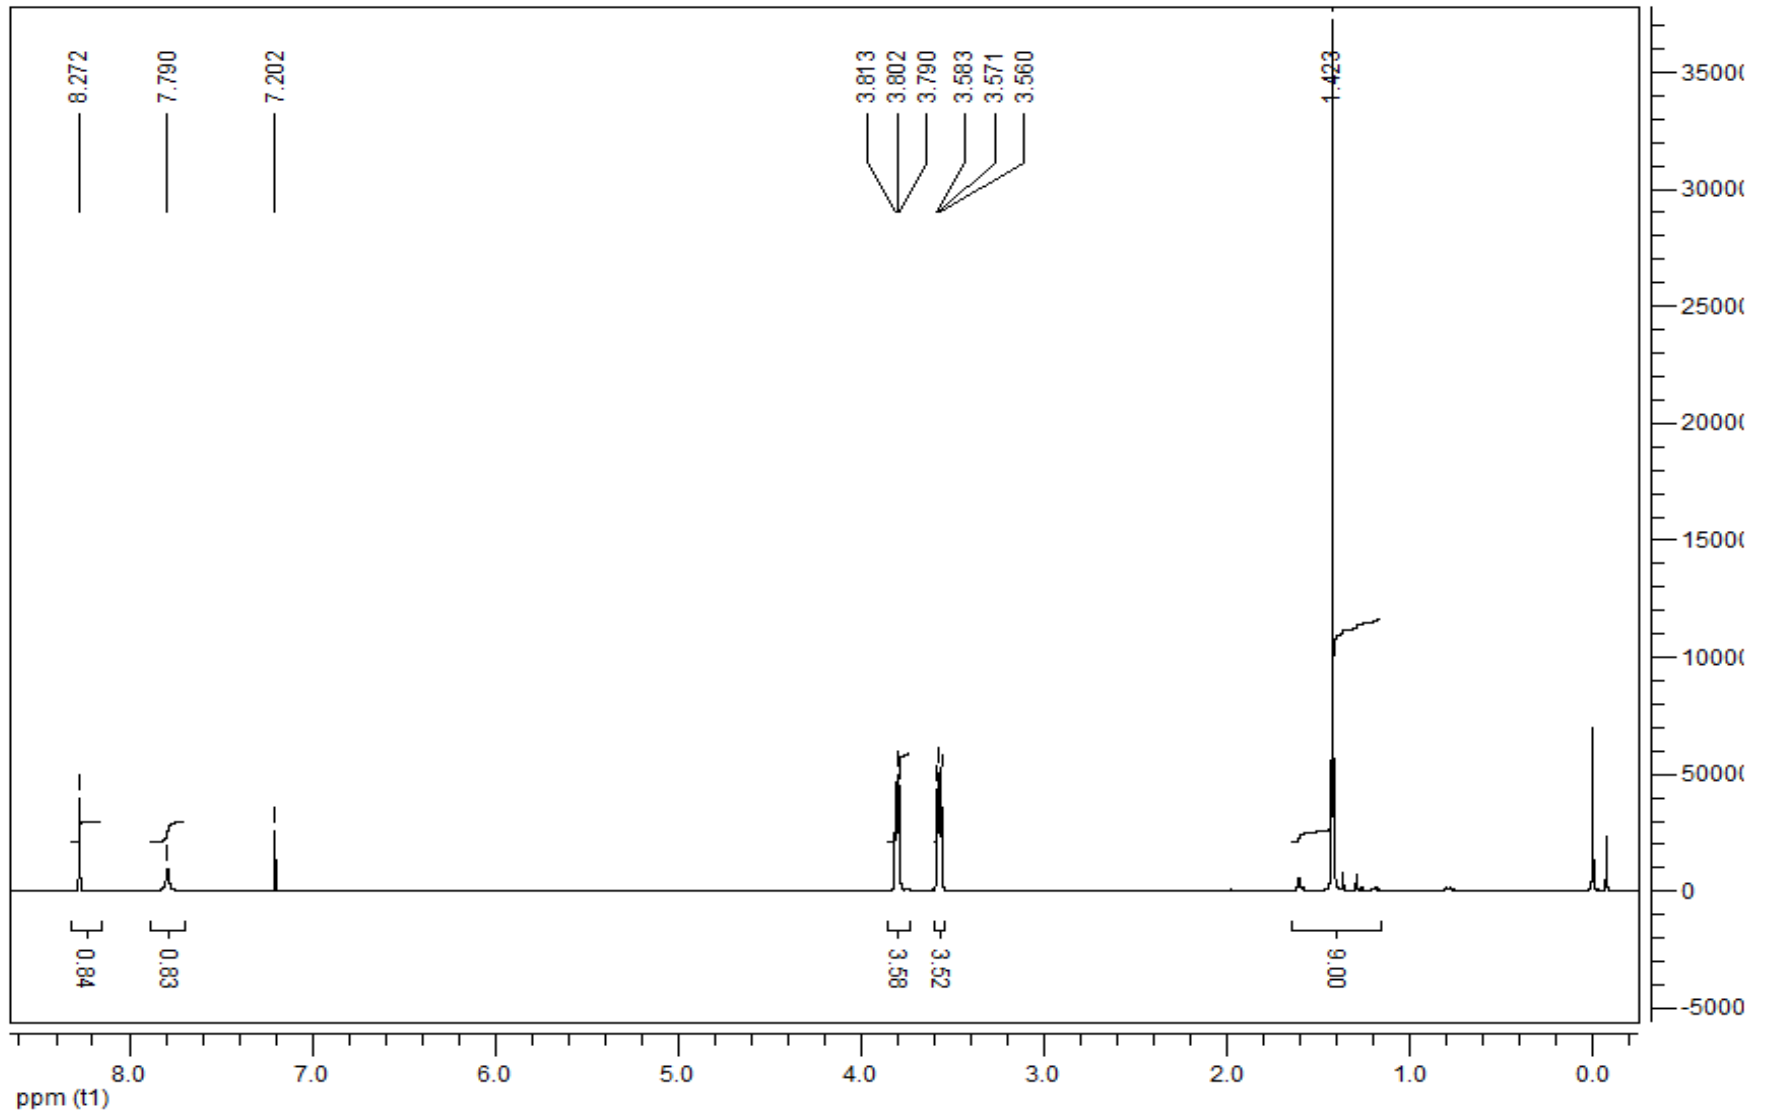

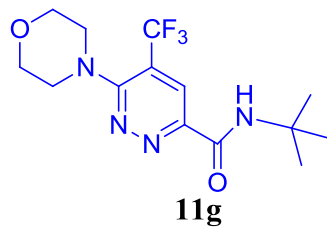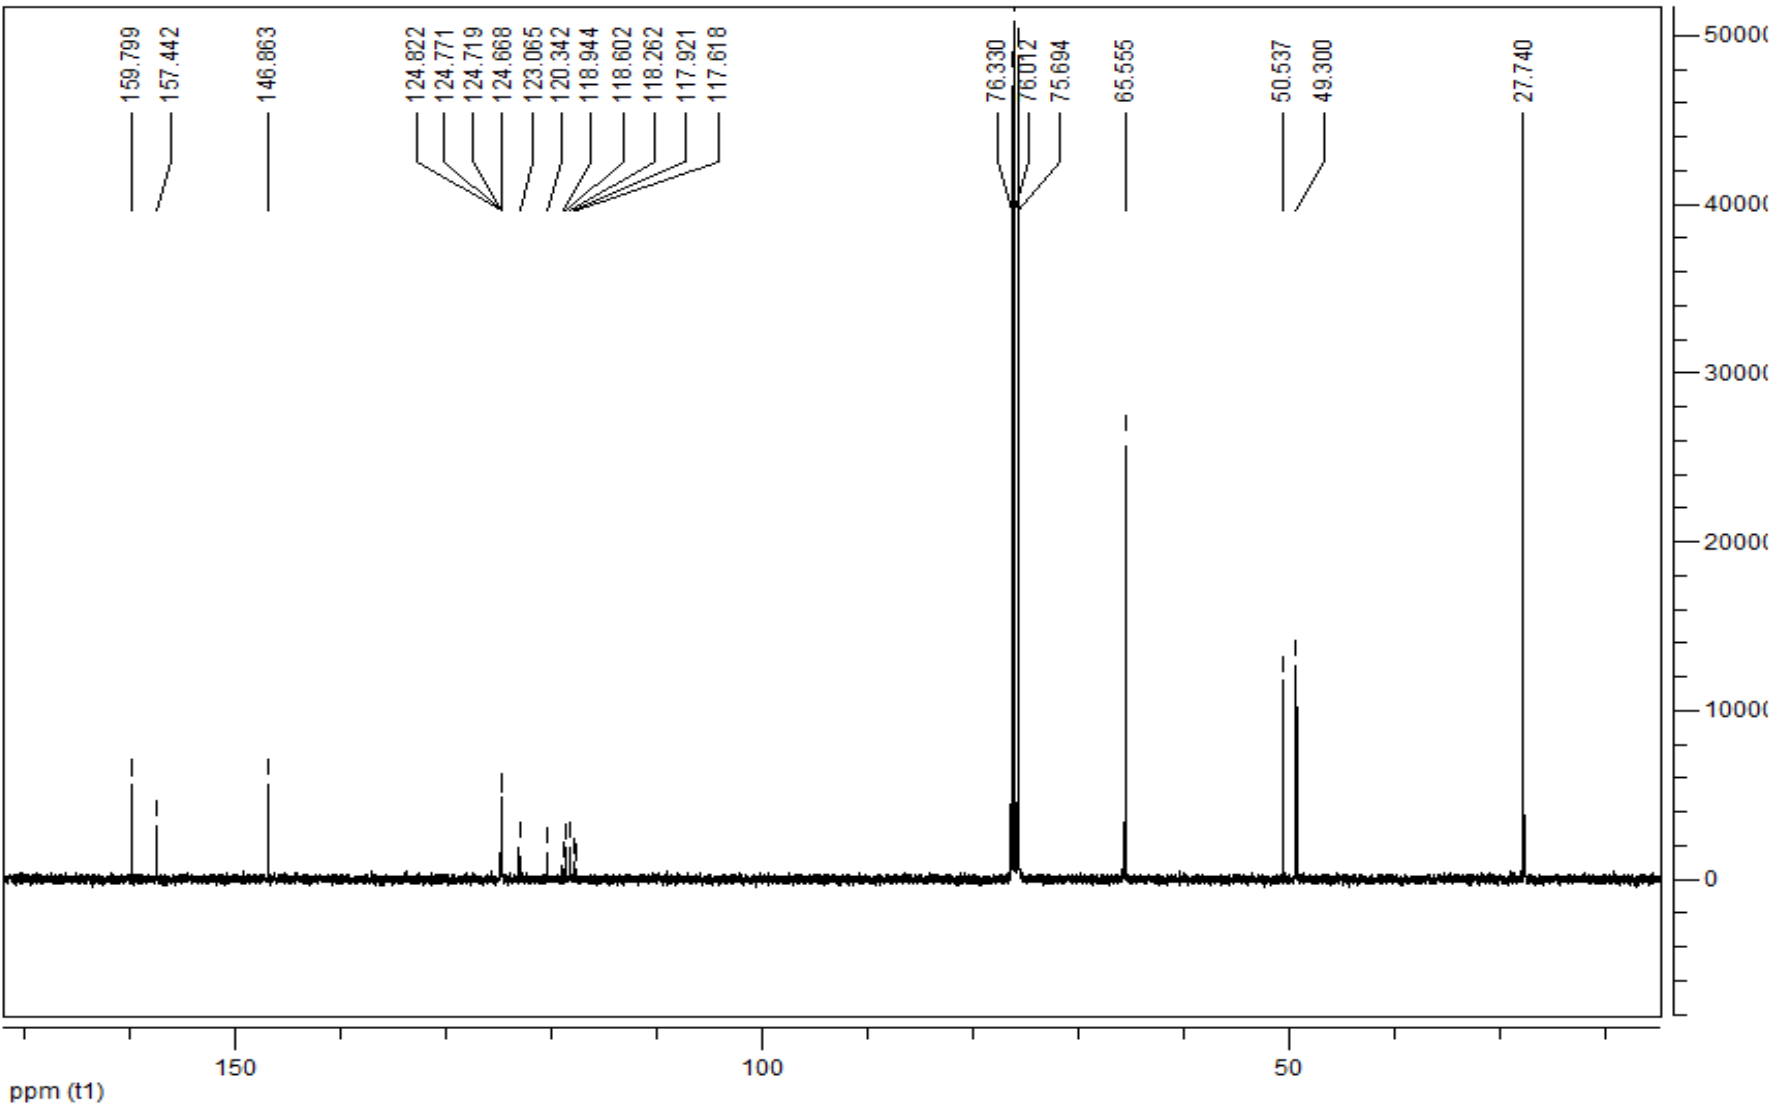

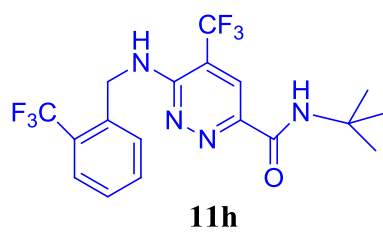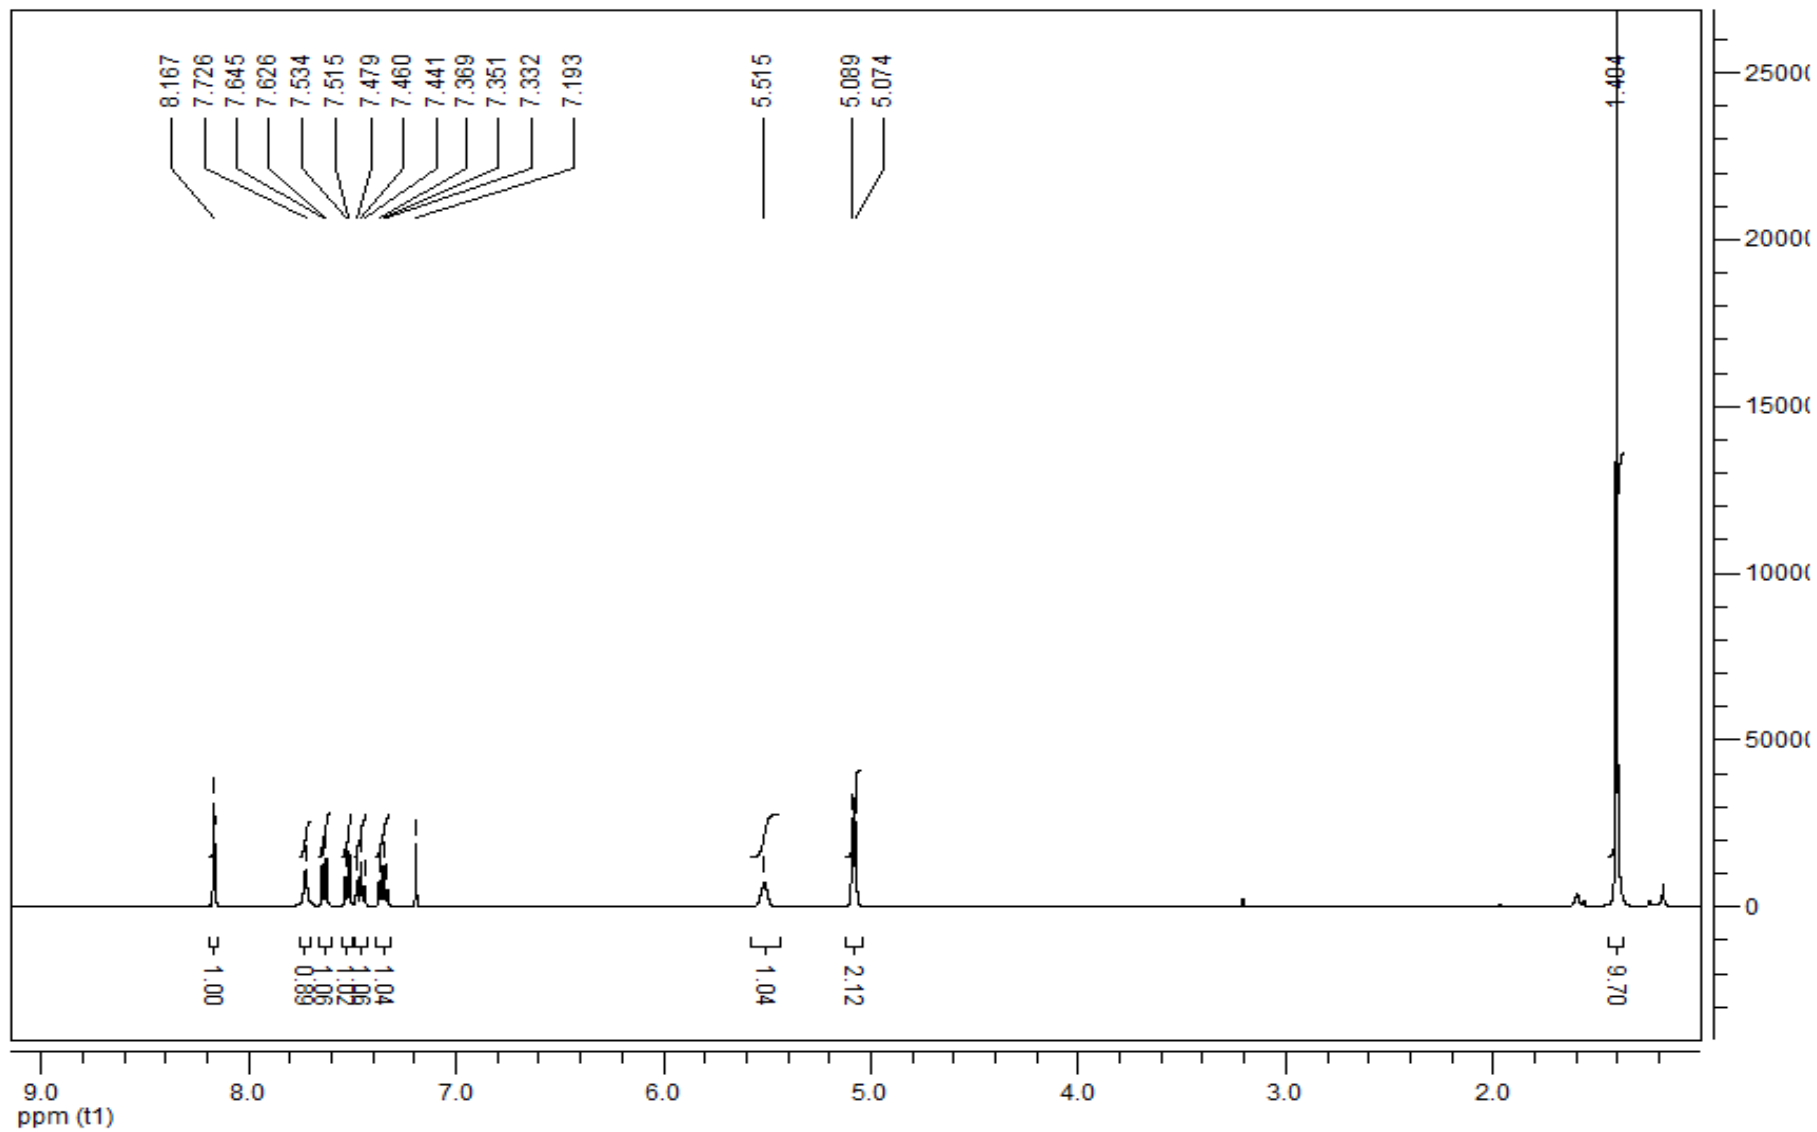

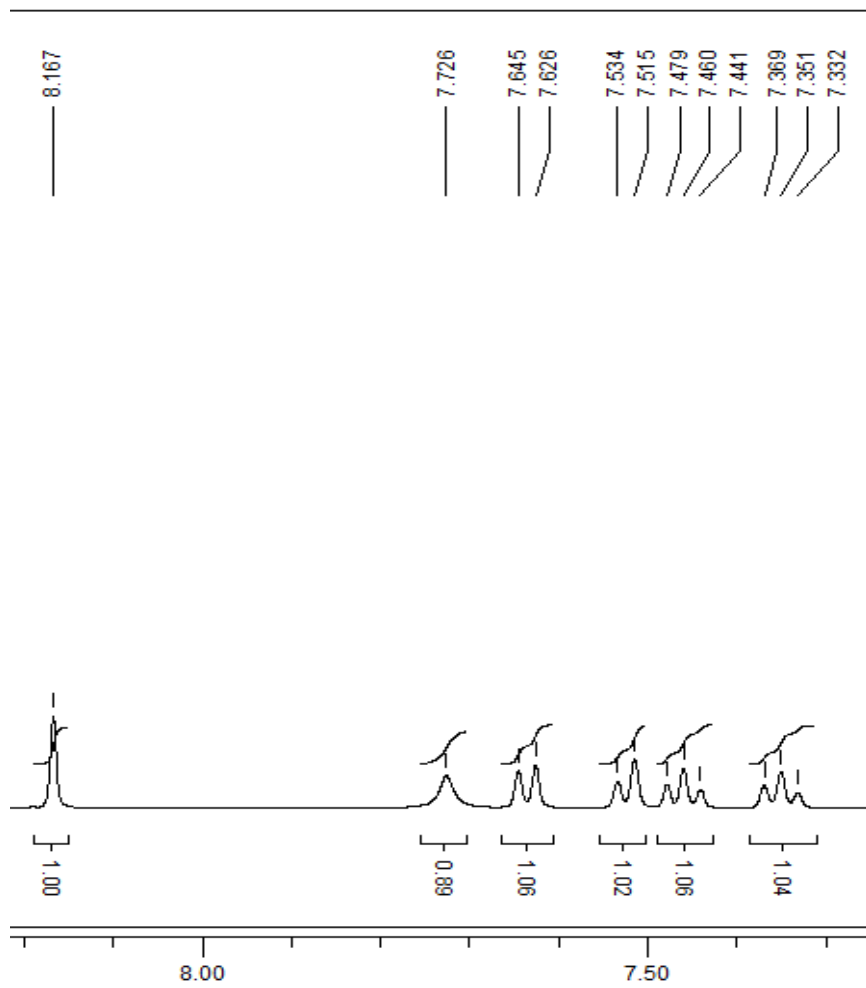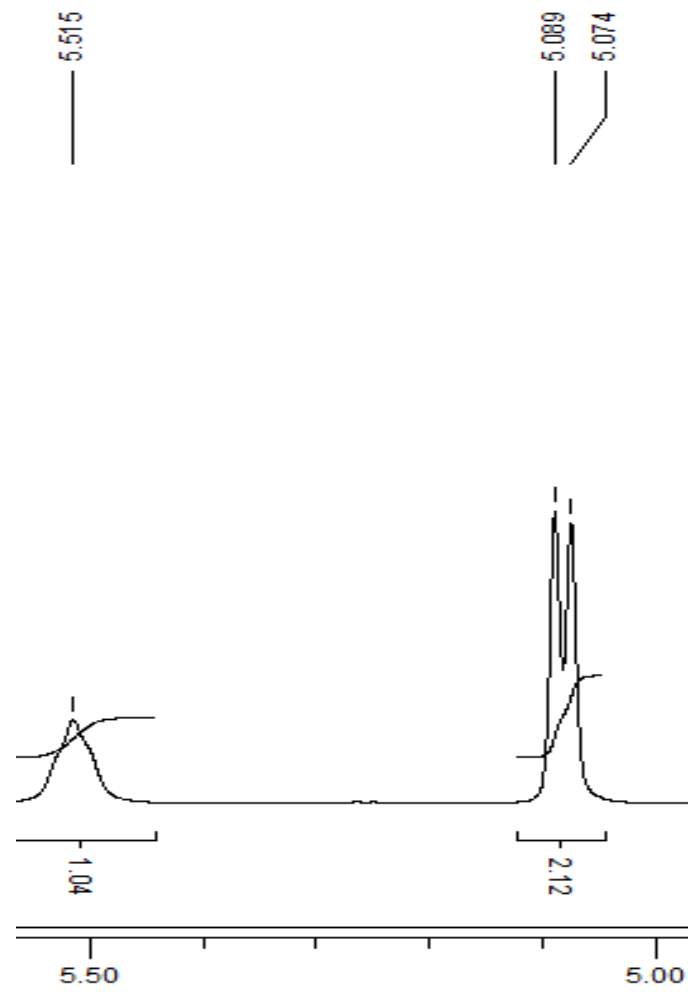

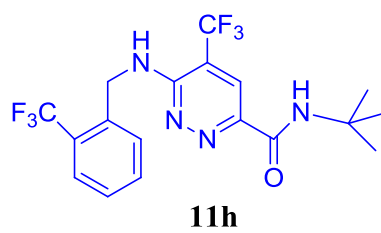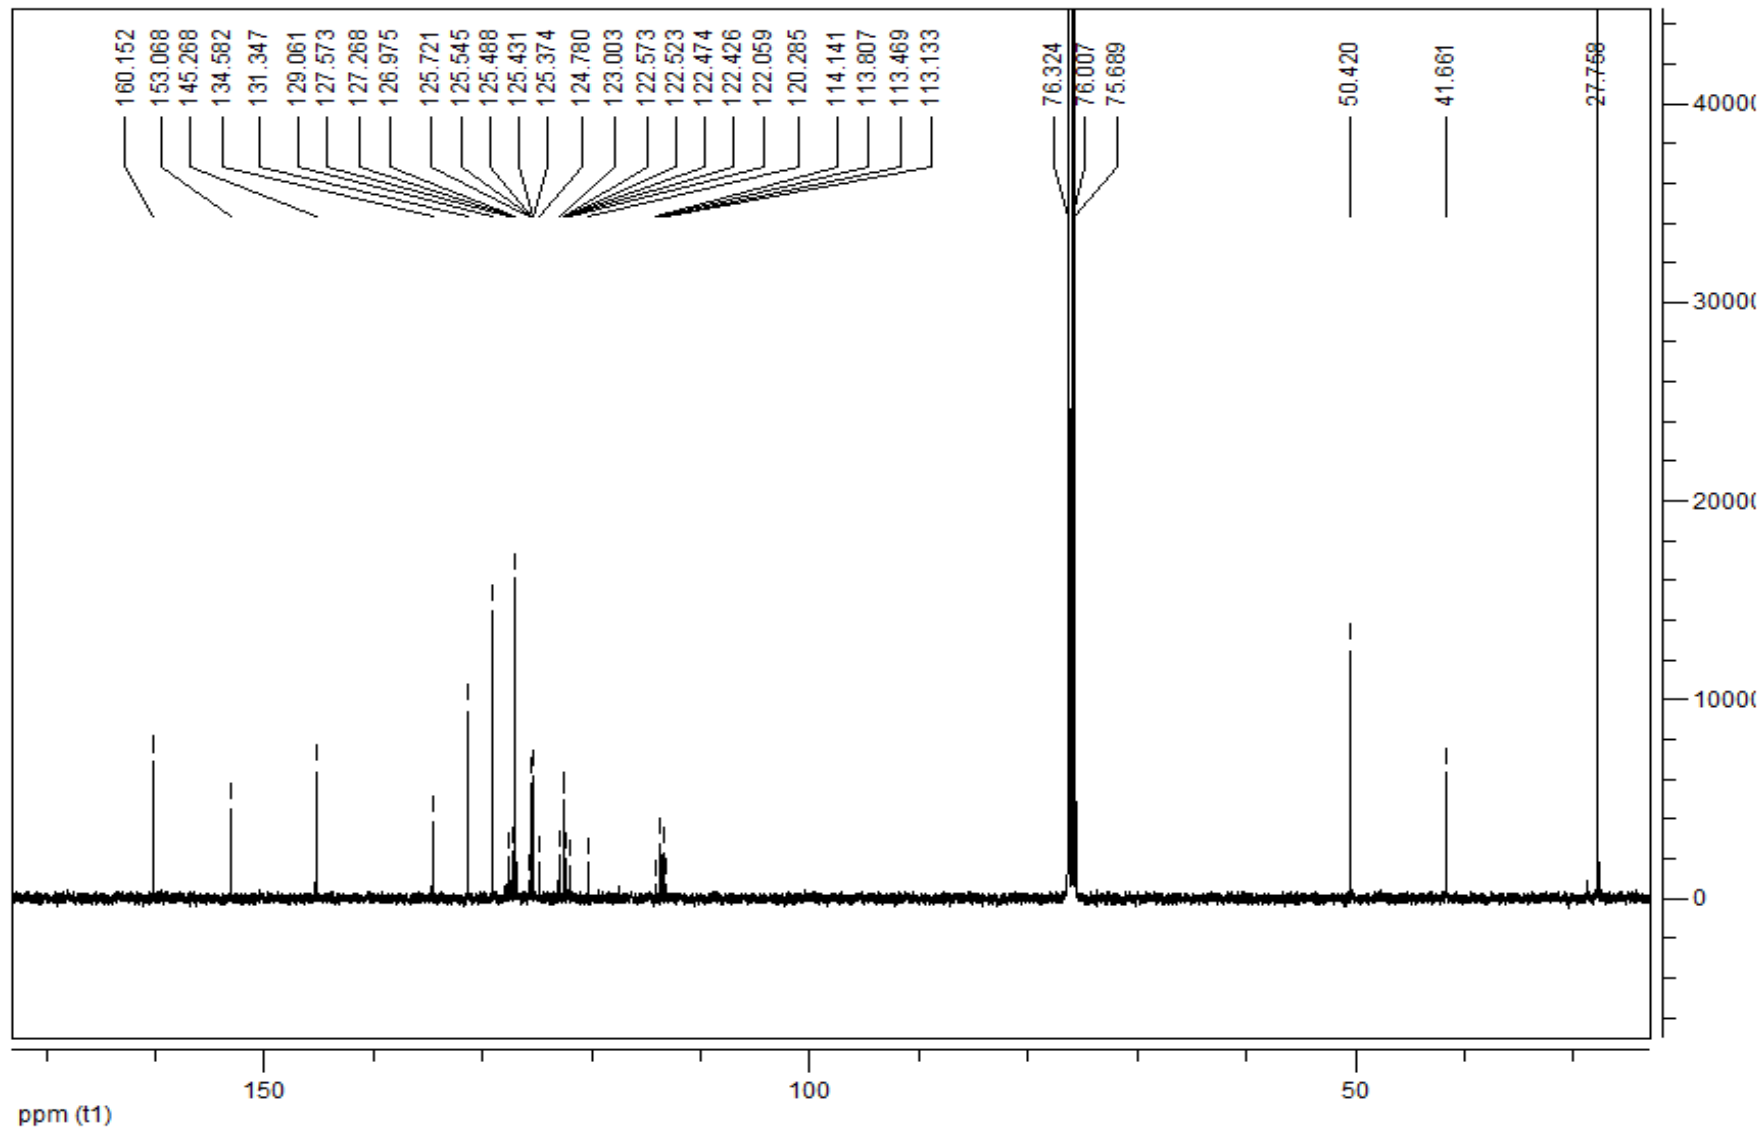



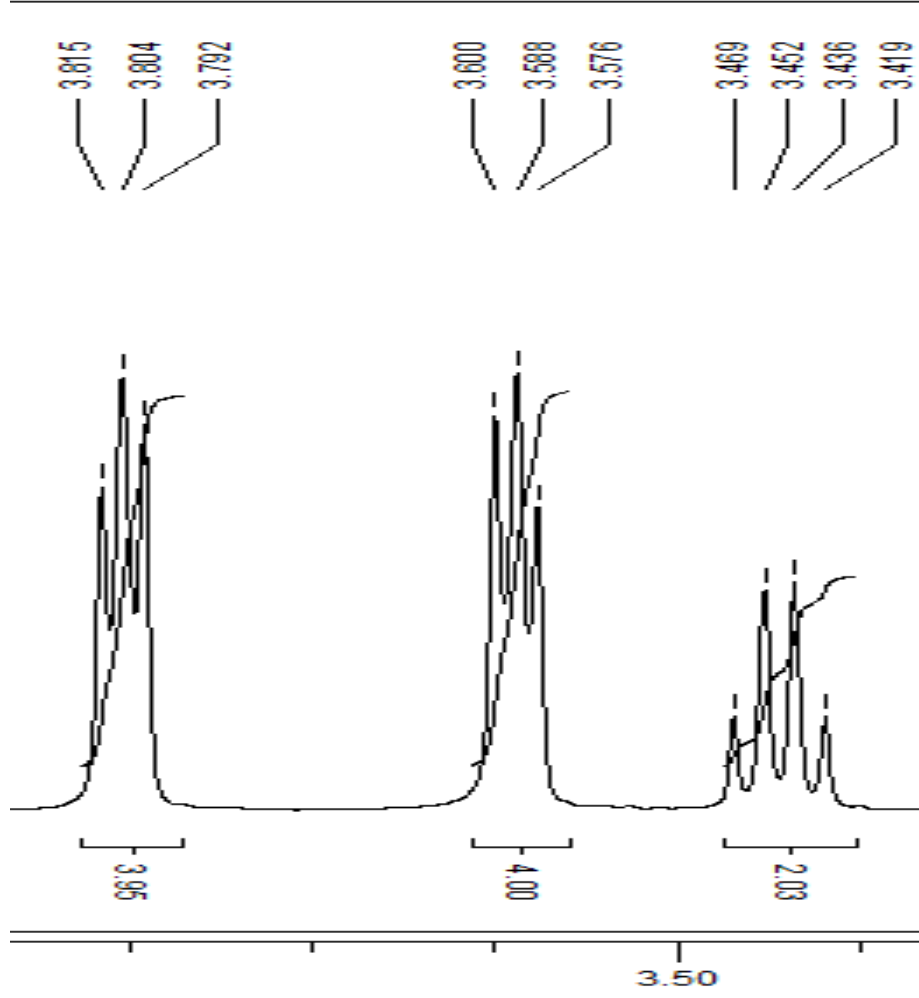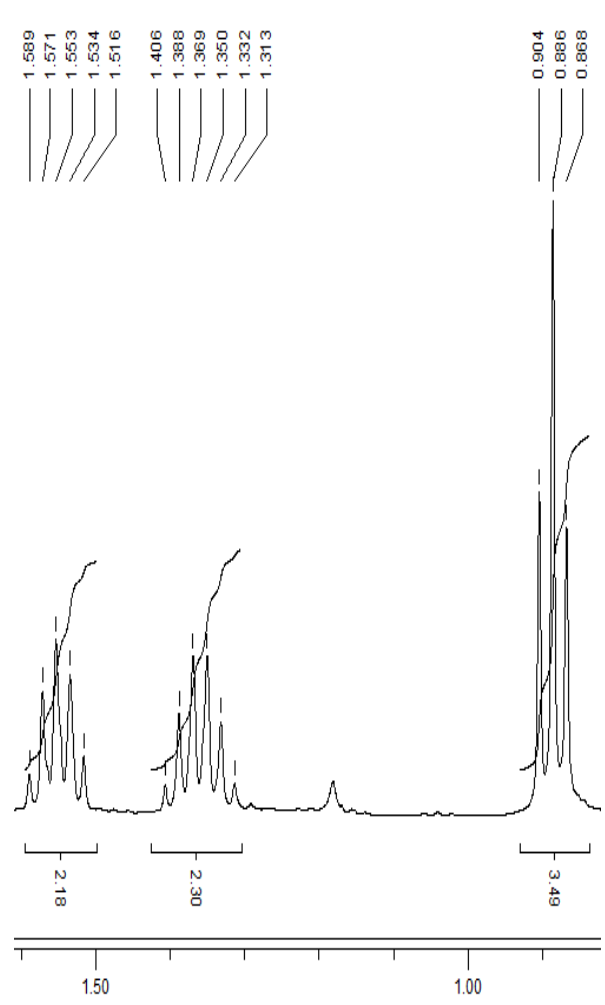



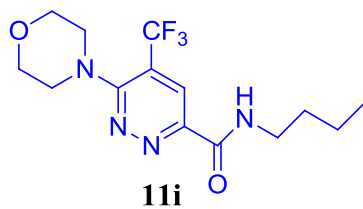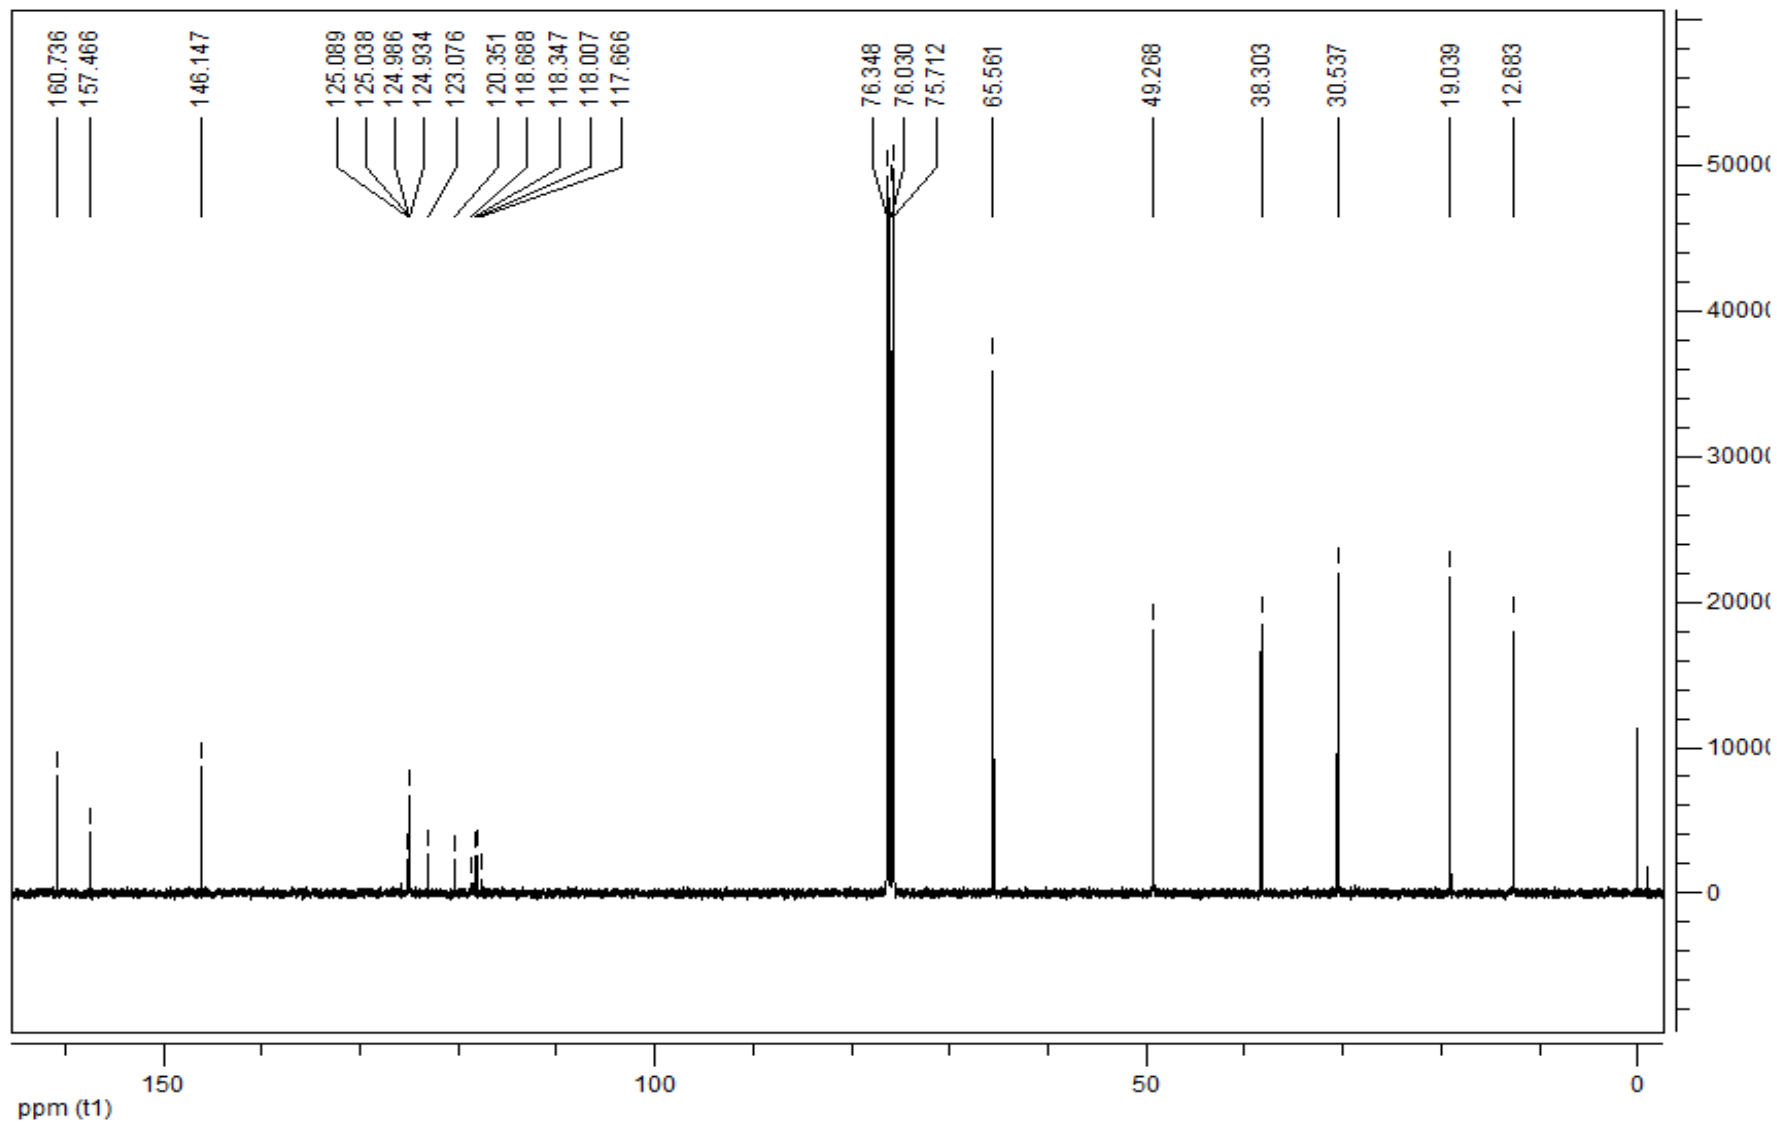

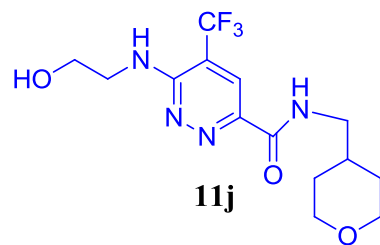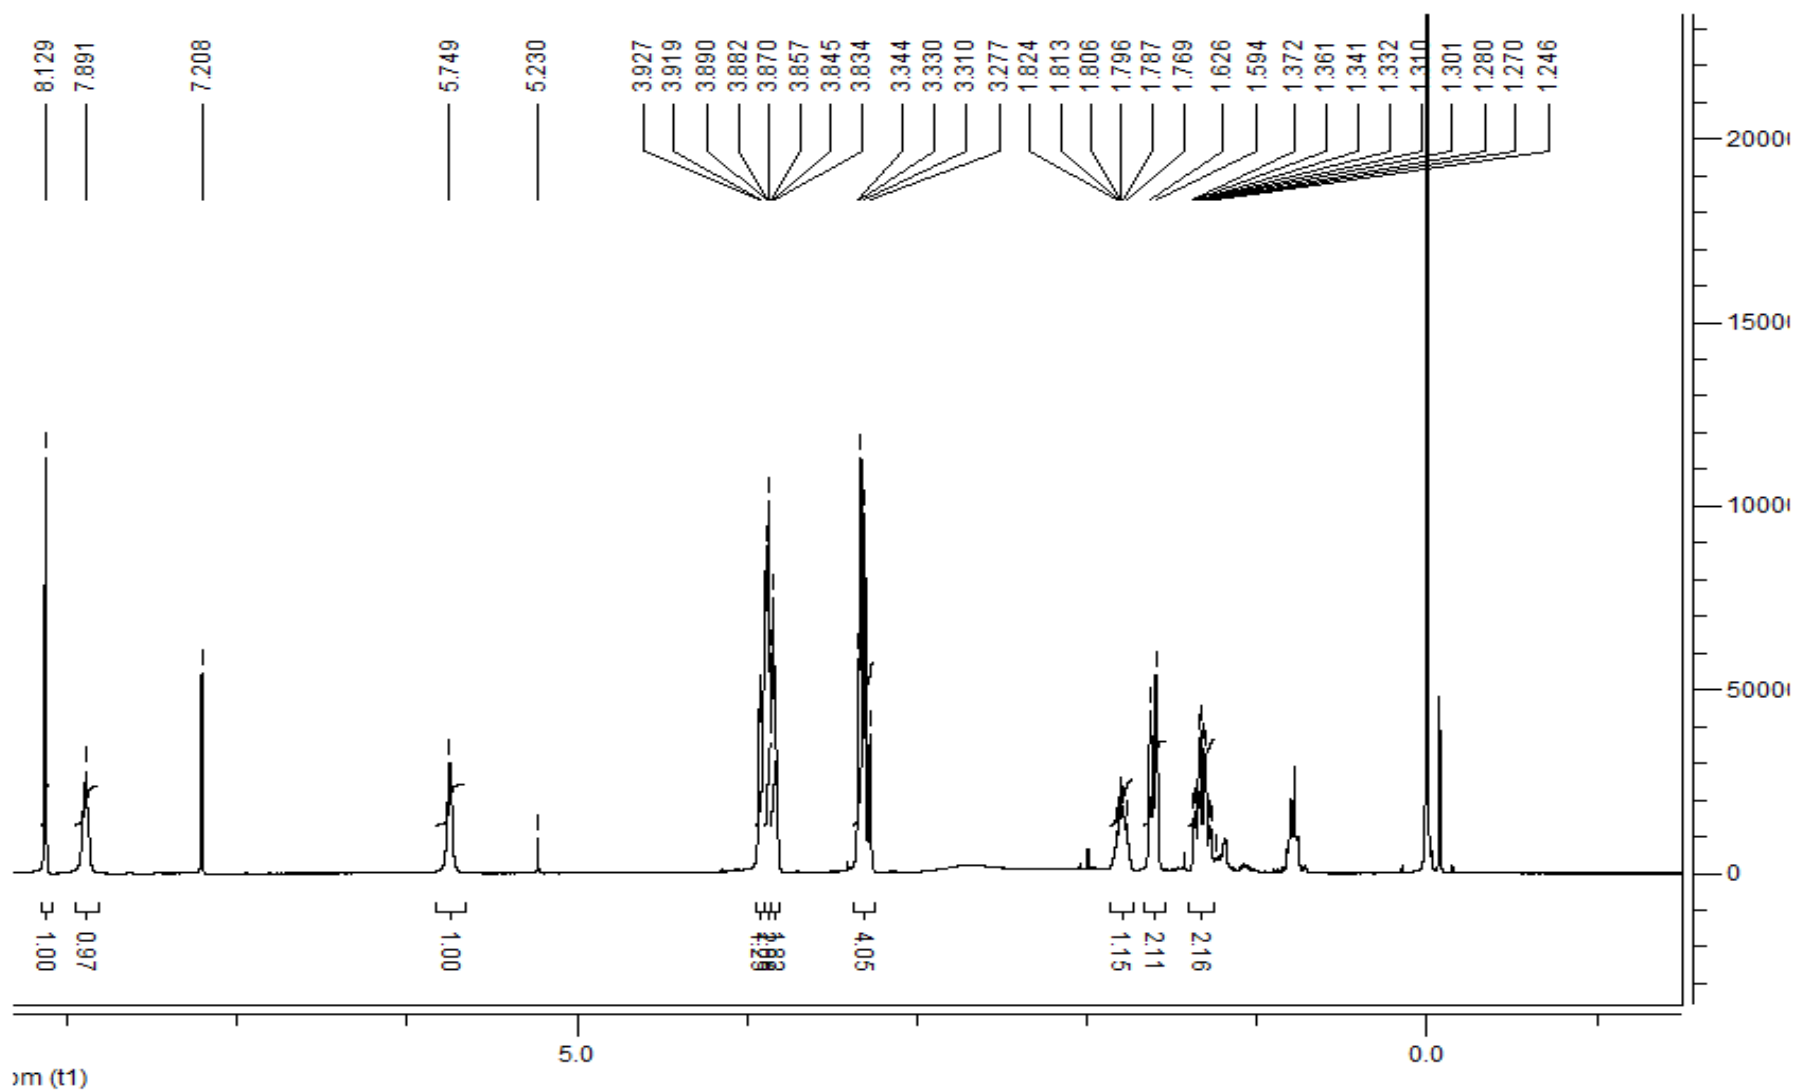

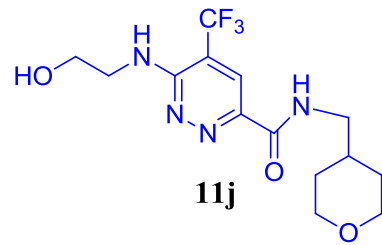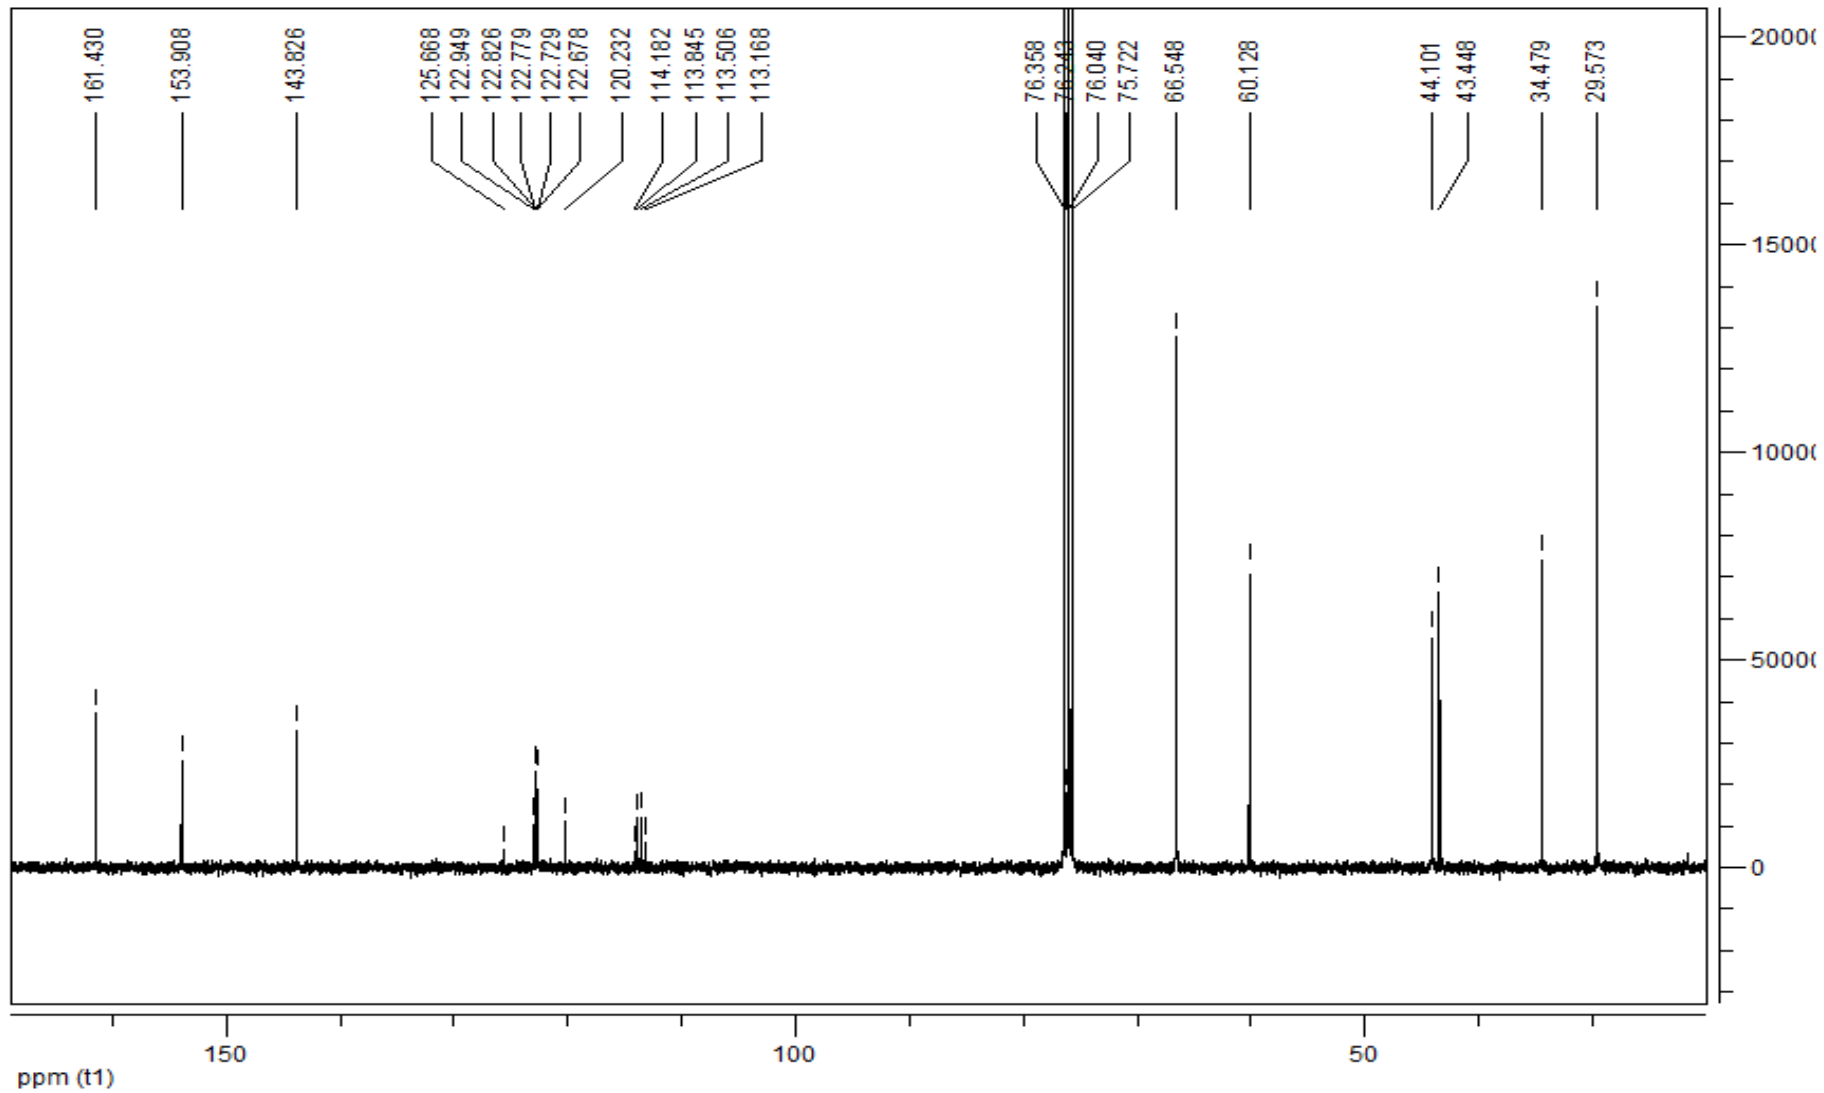

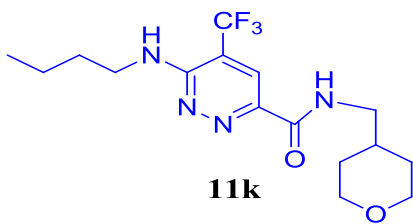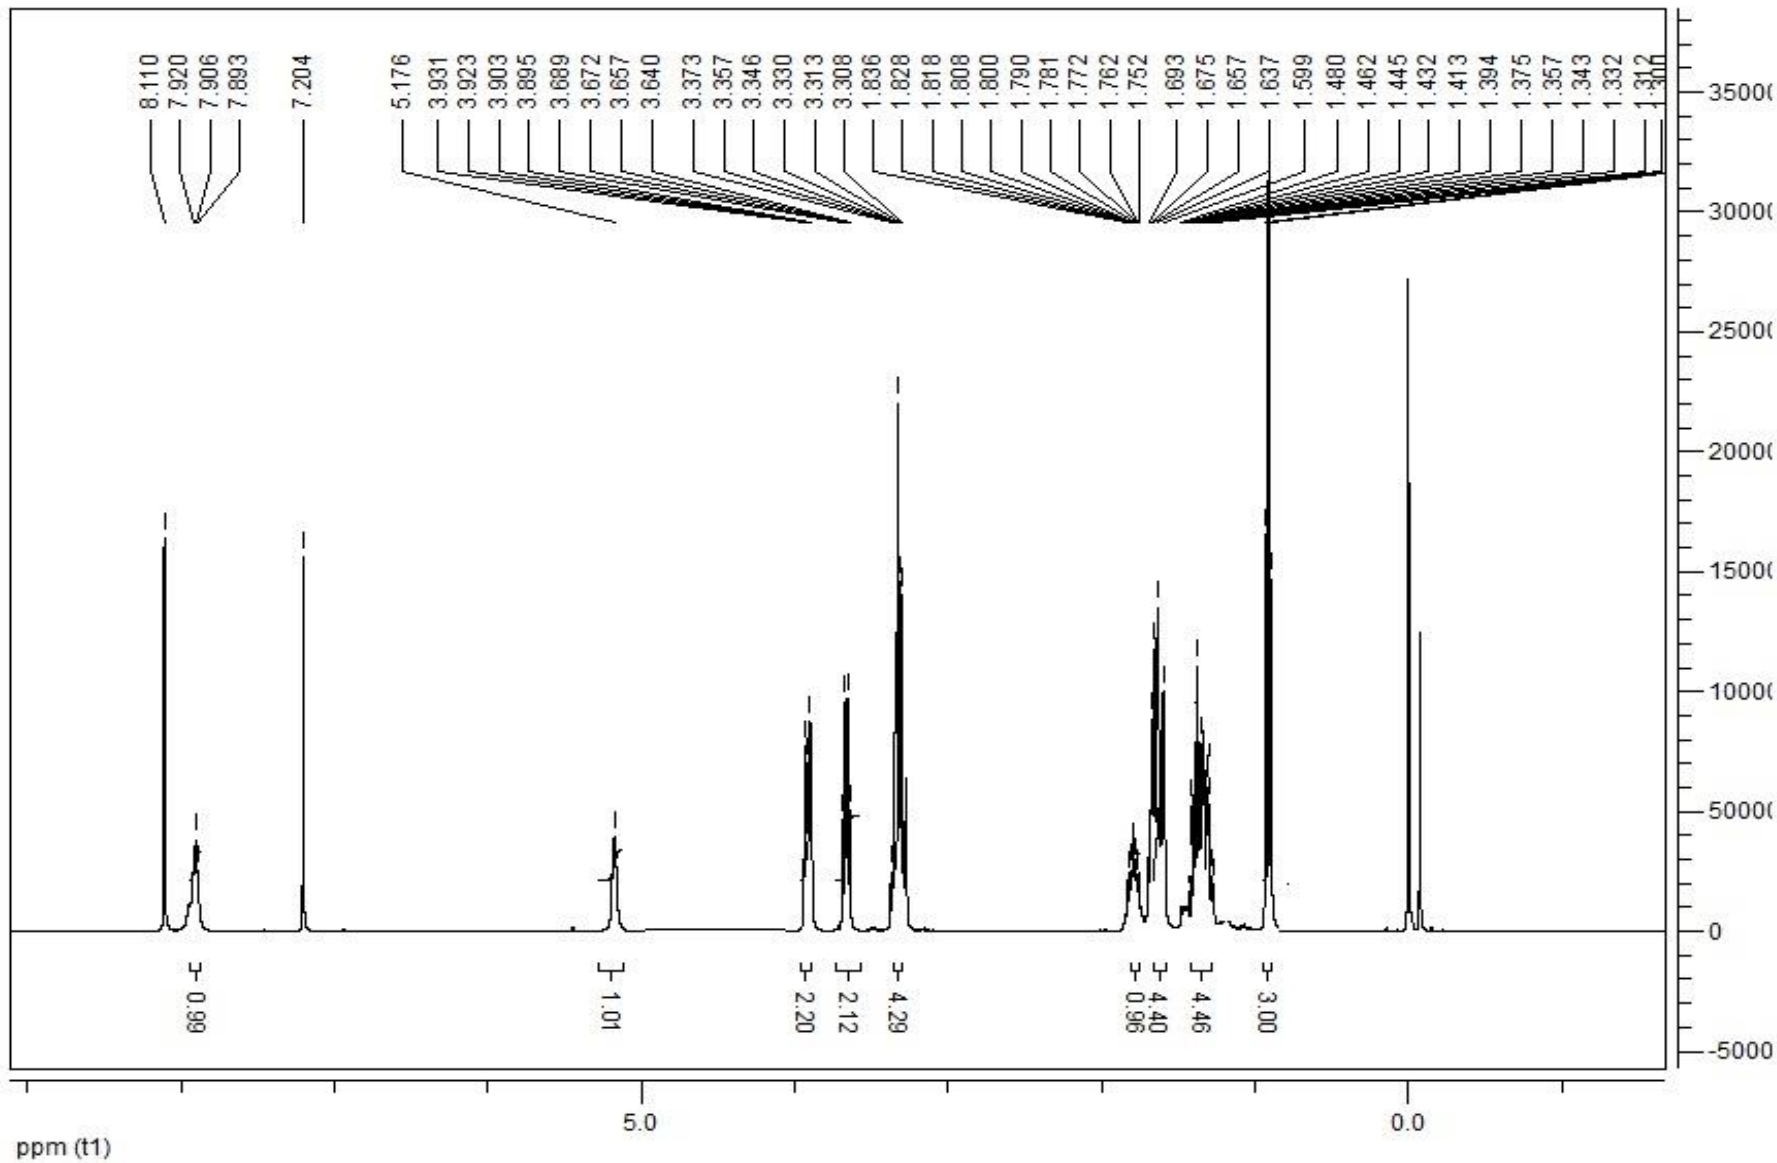

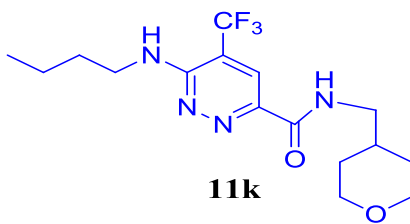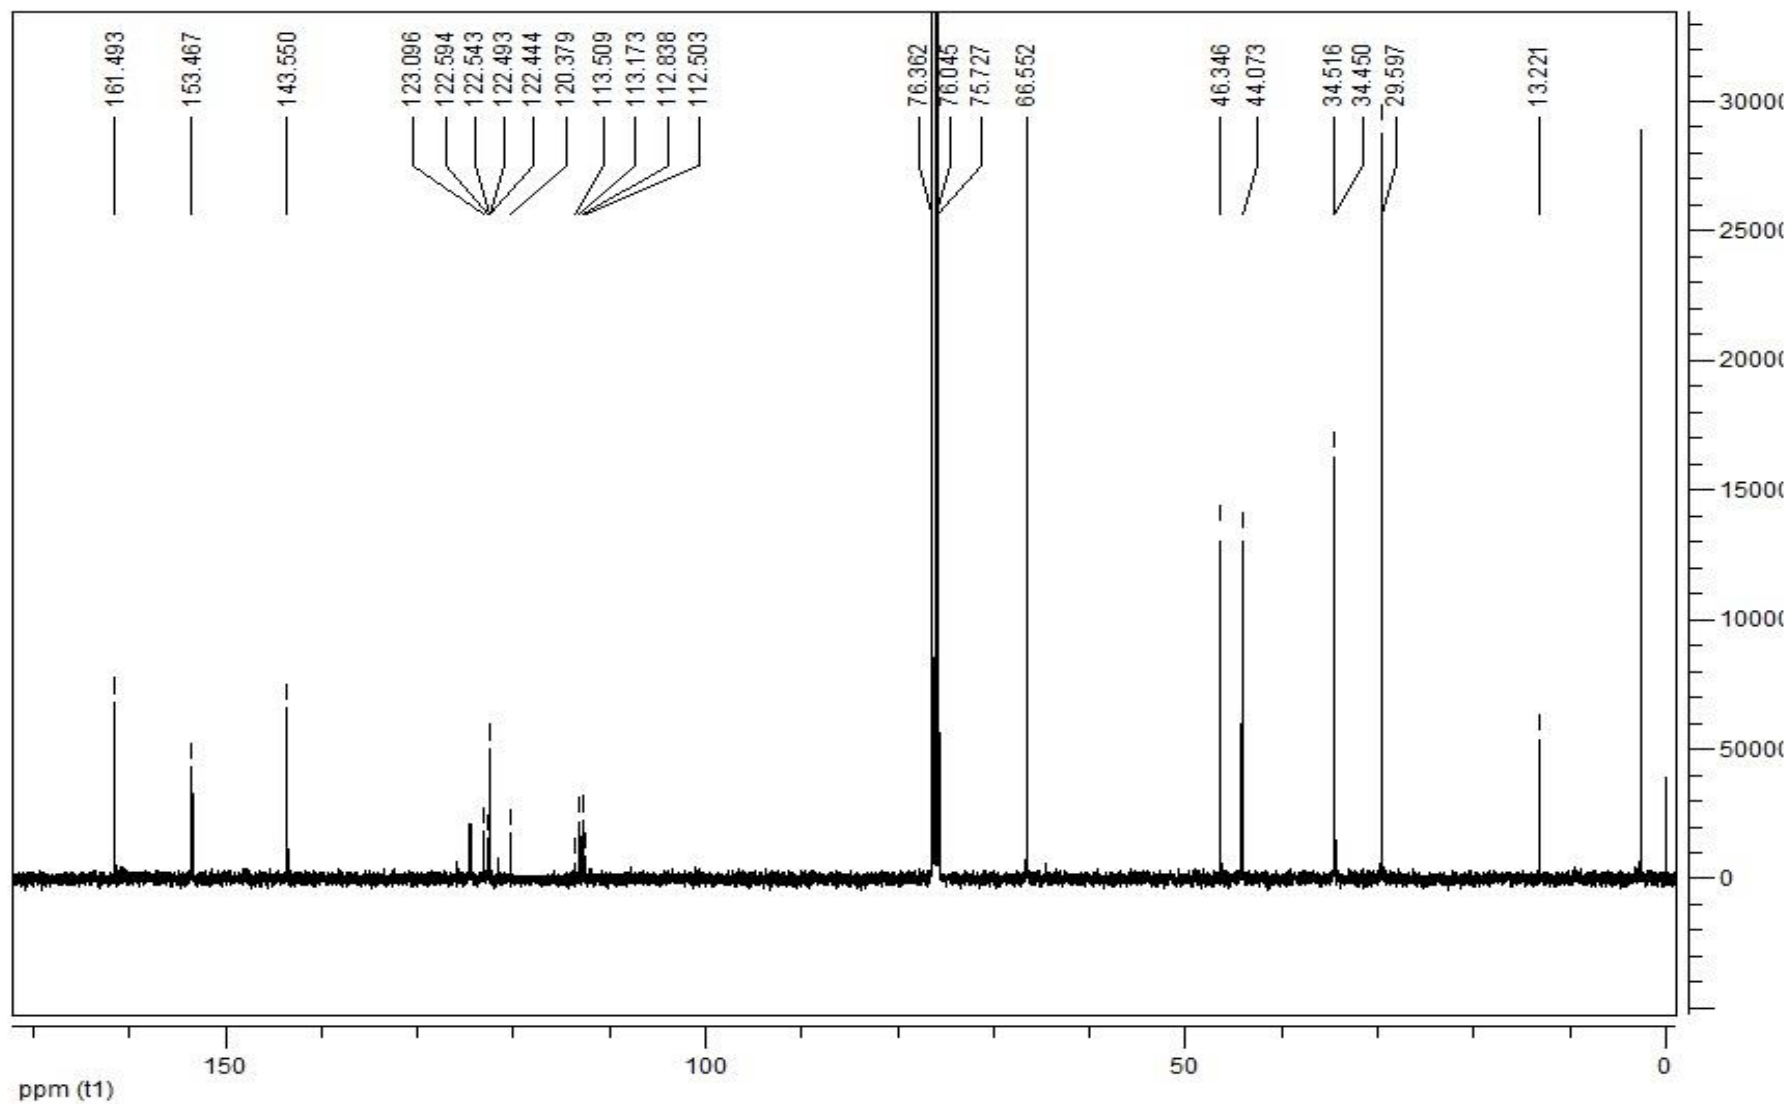

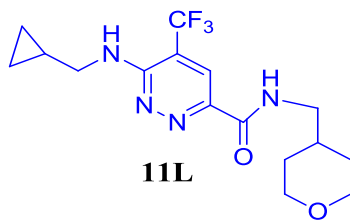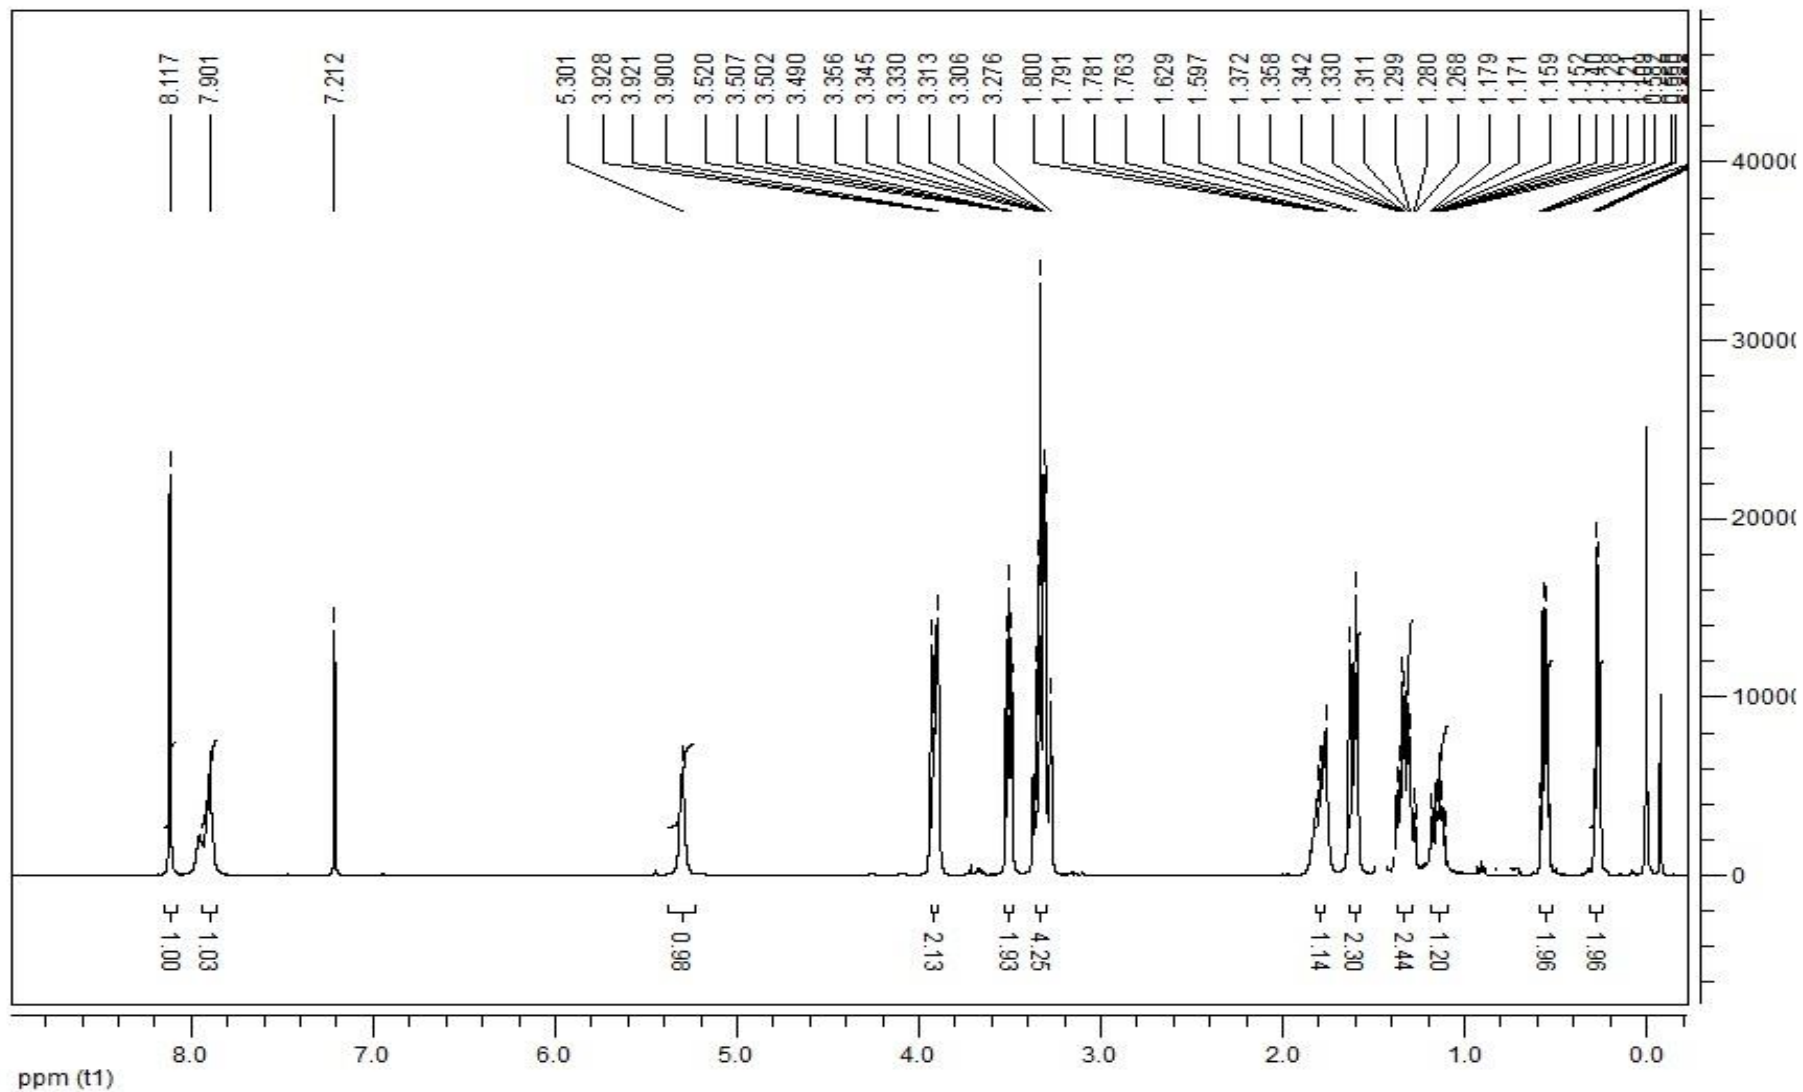

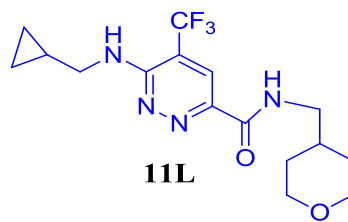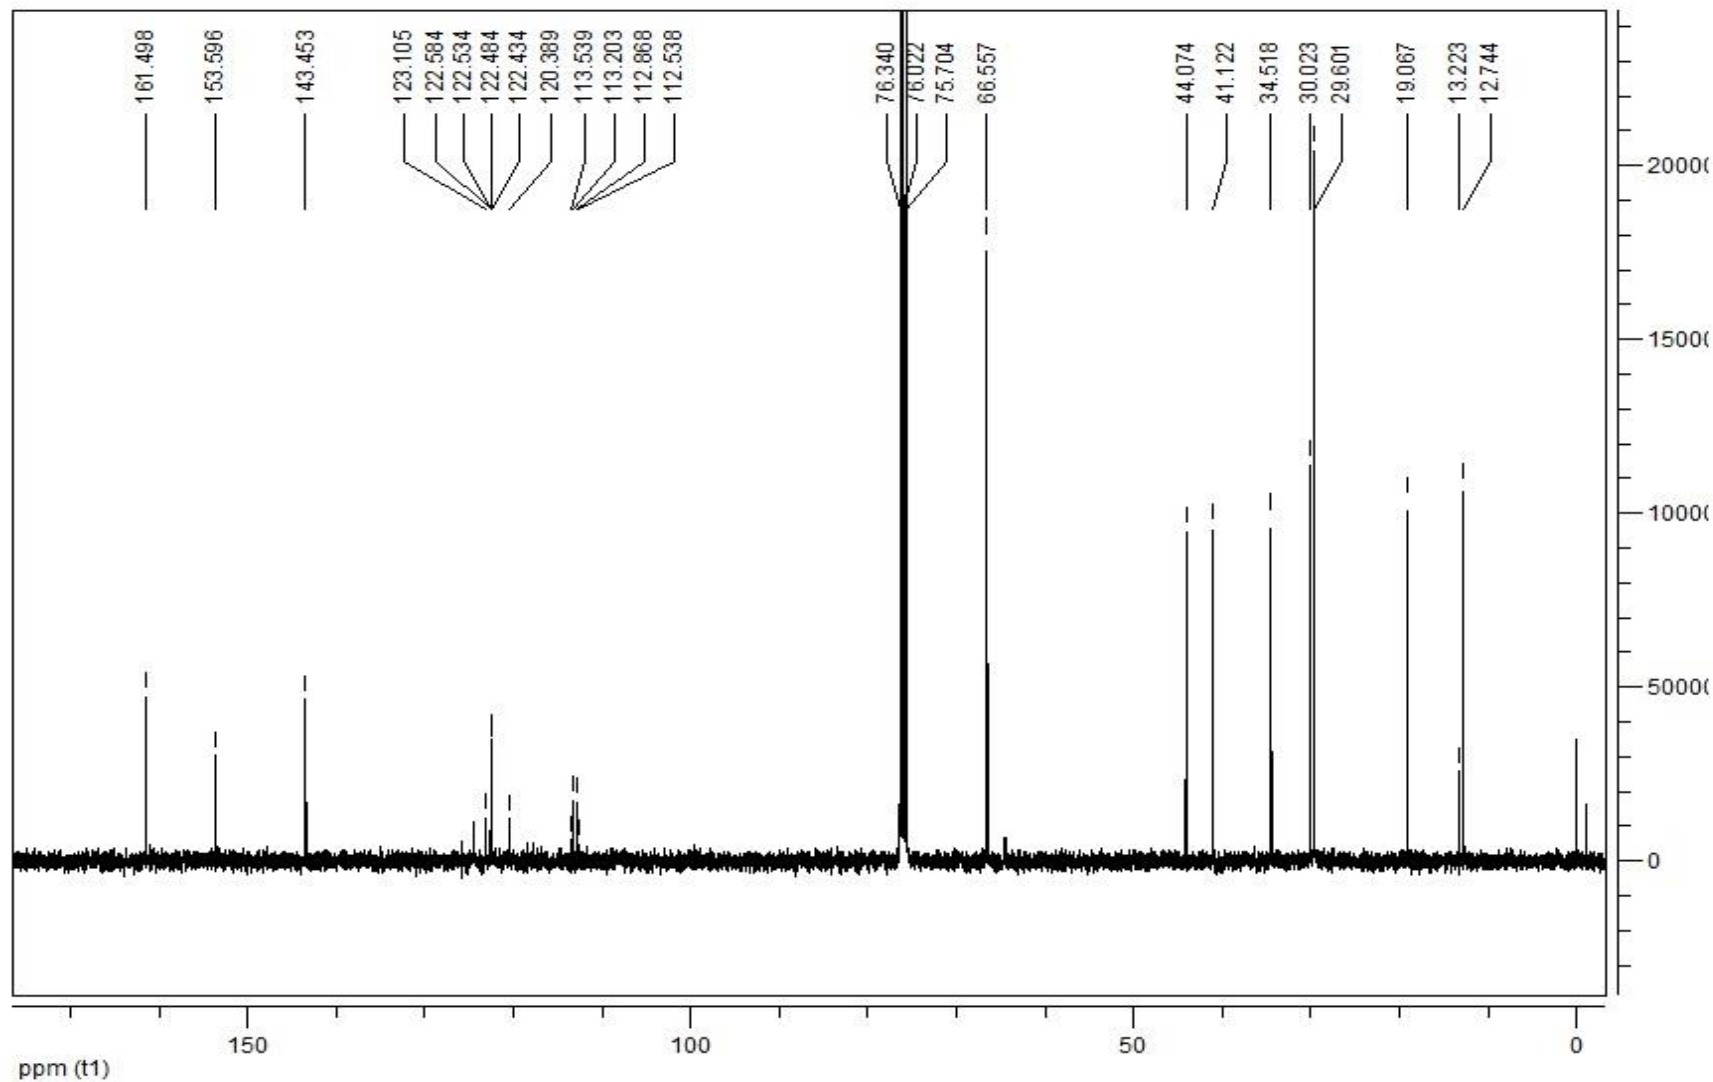

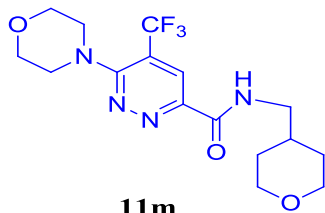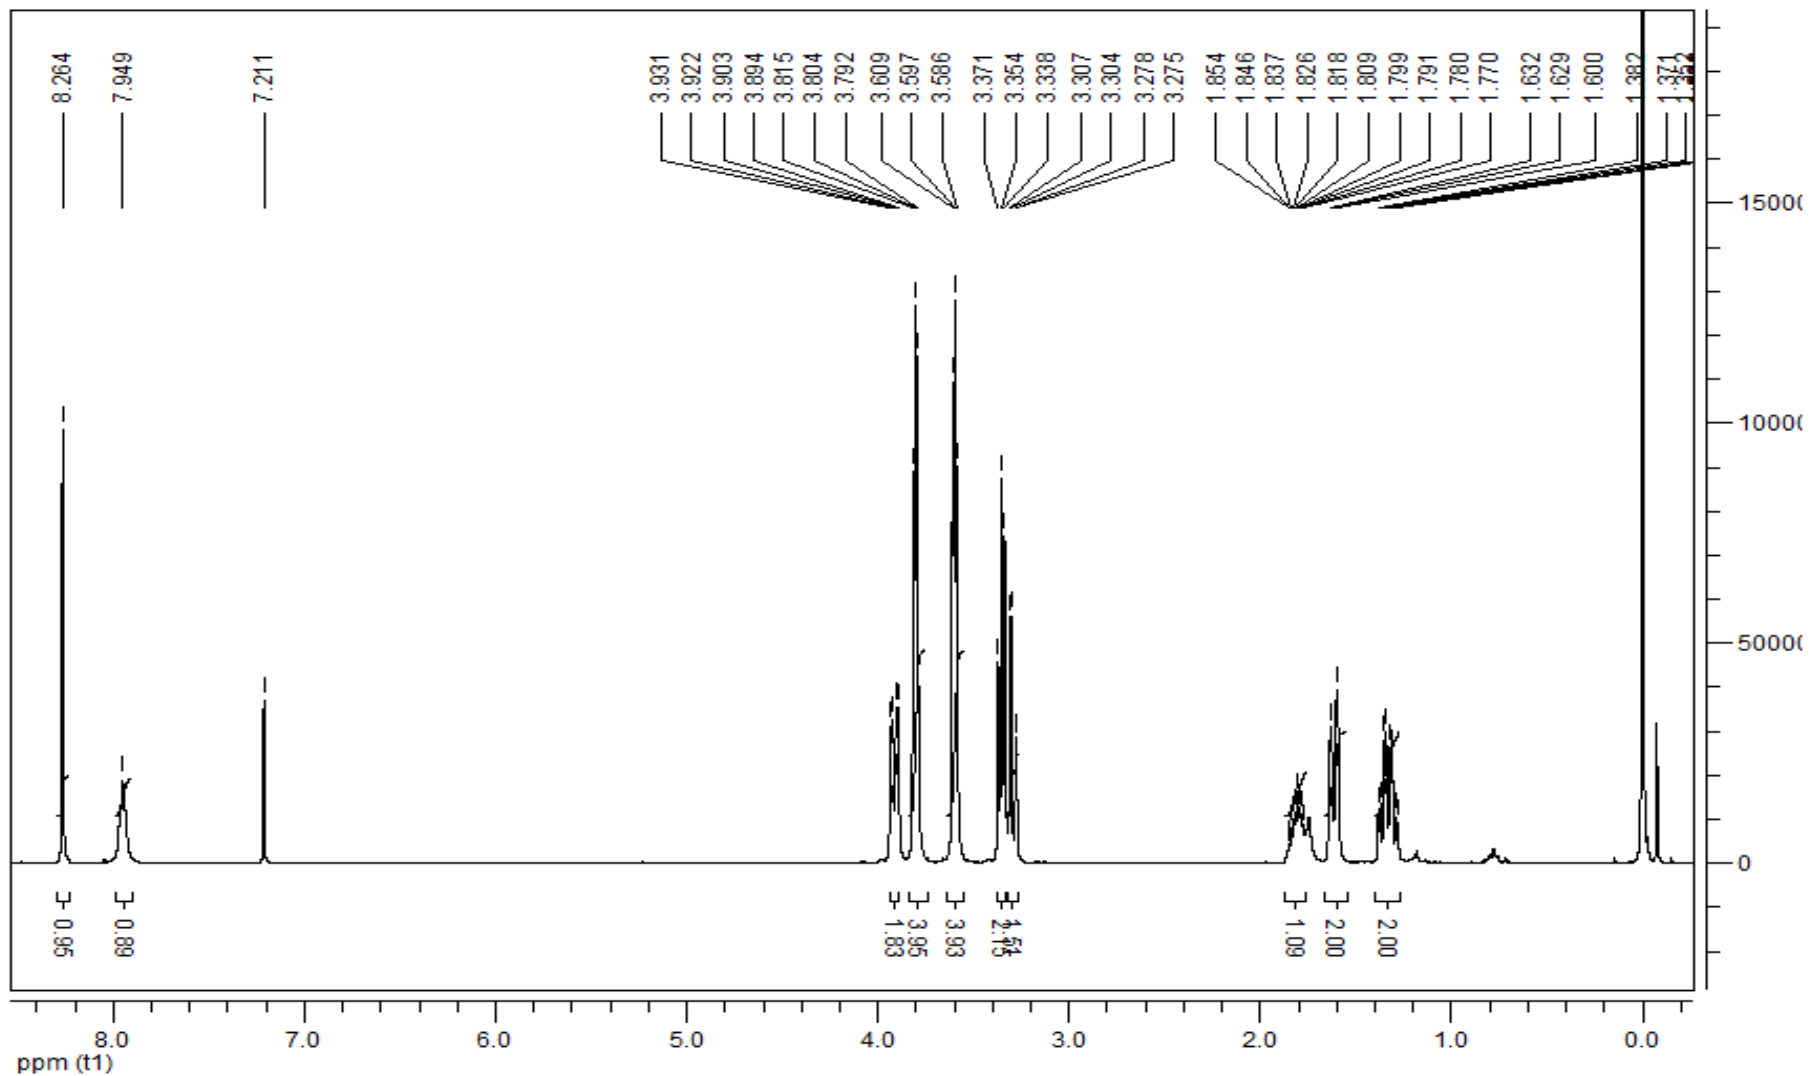



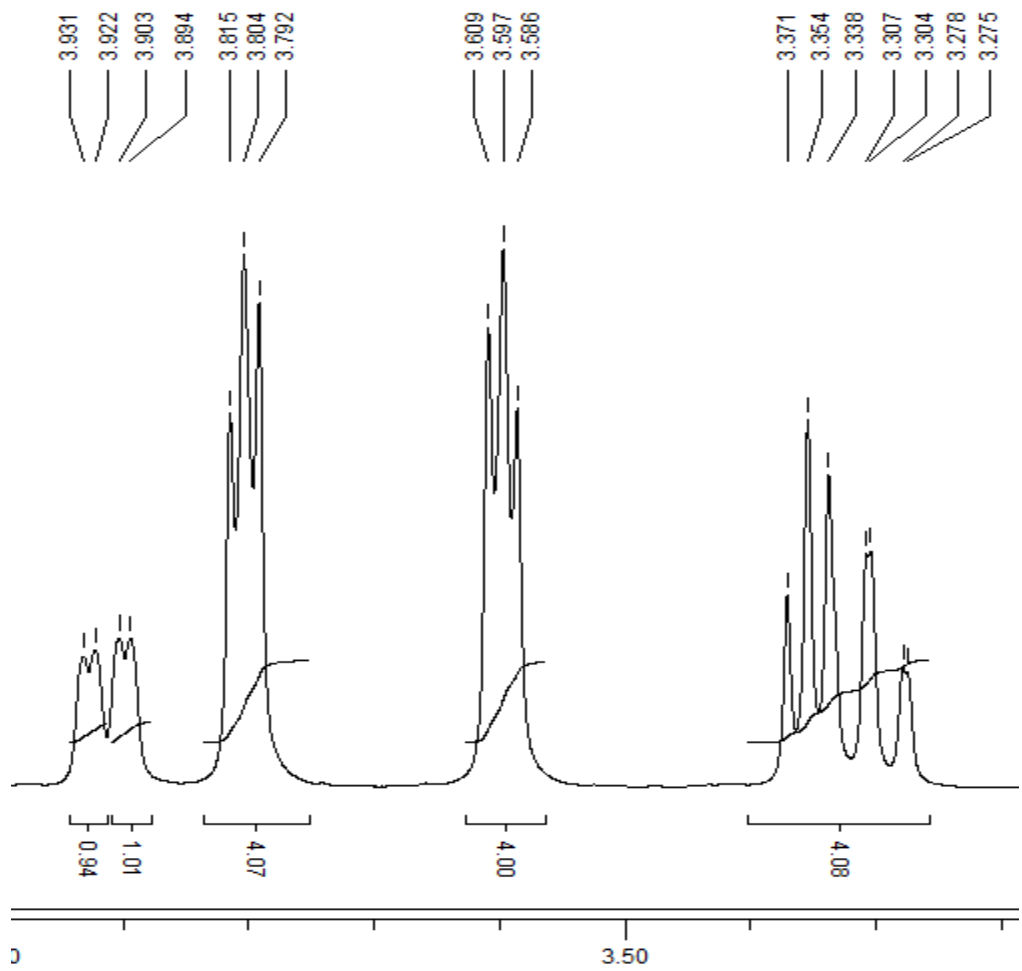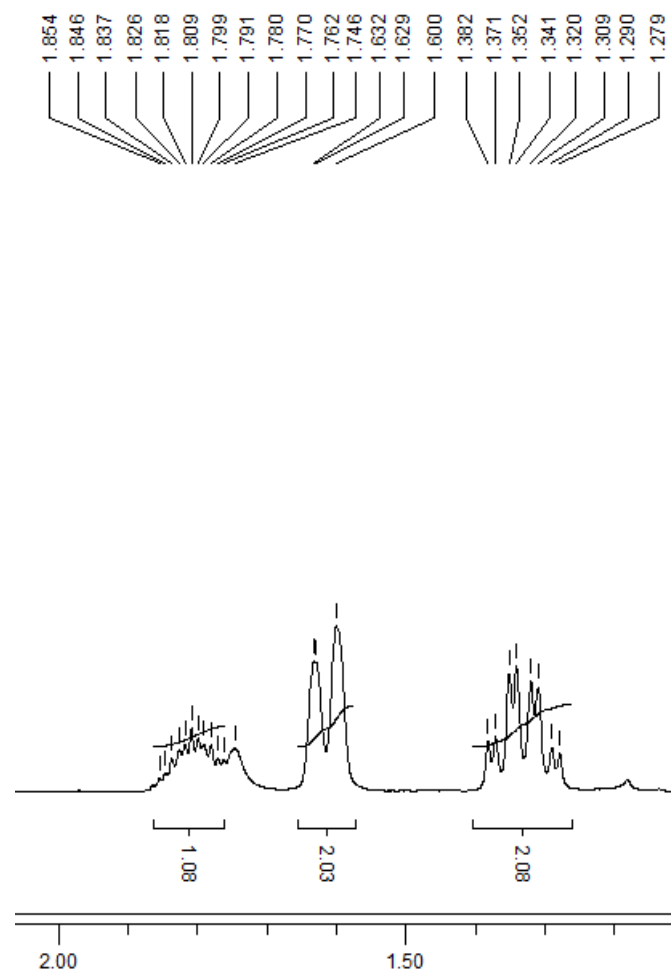

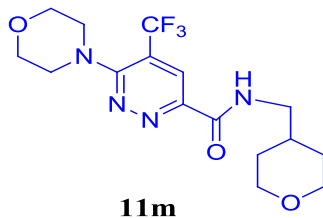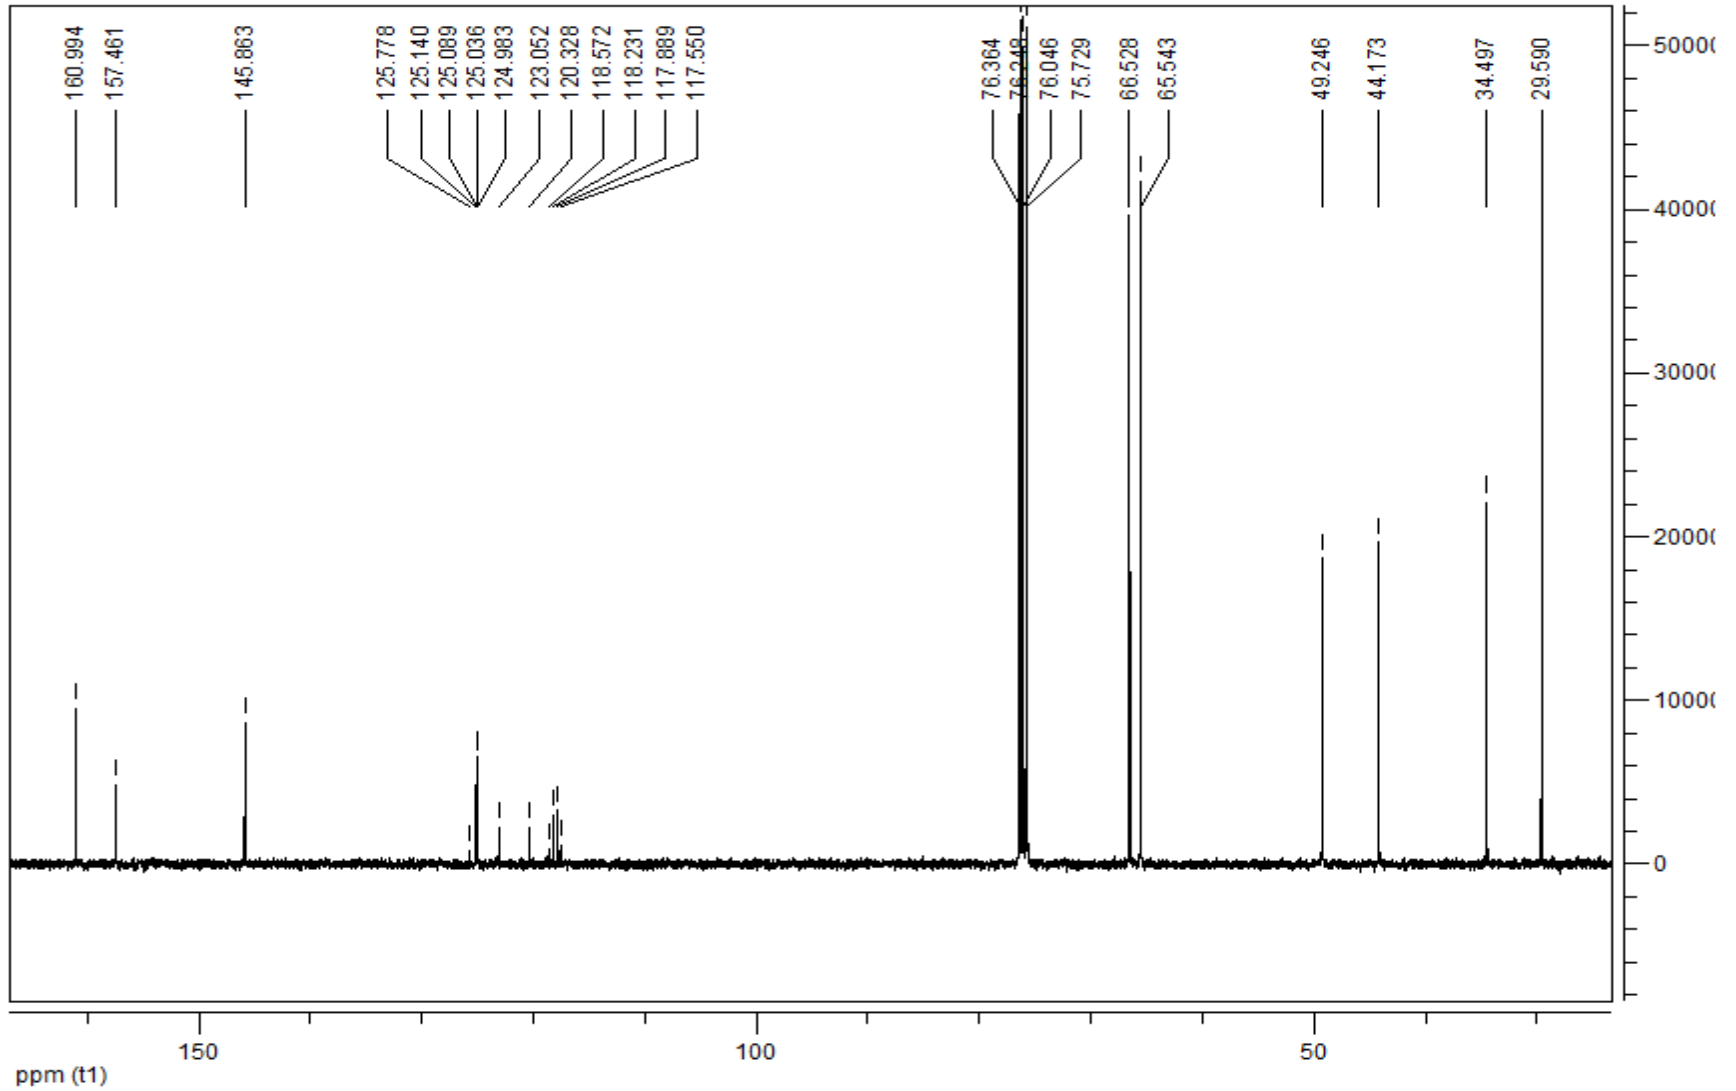

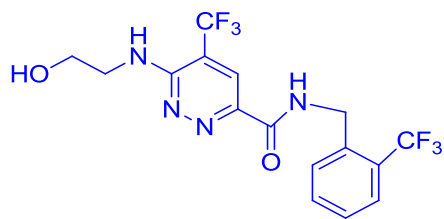

11n

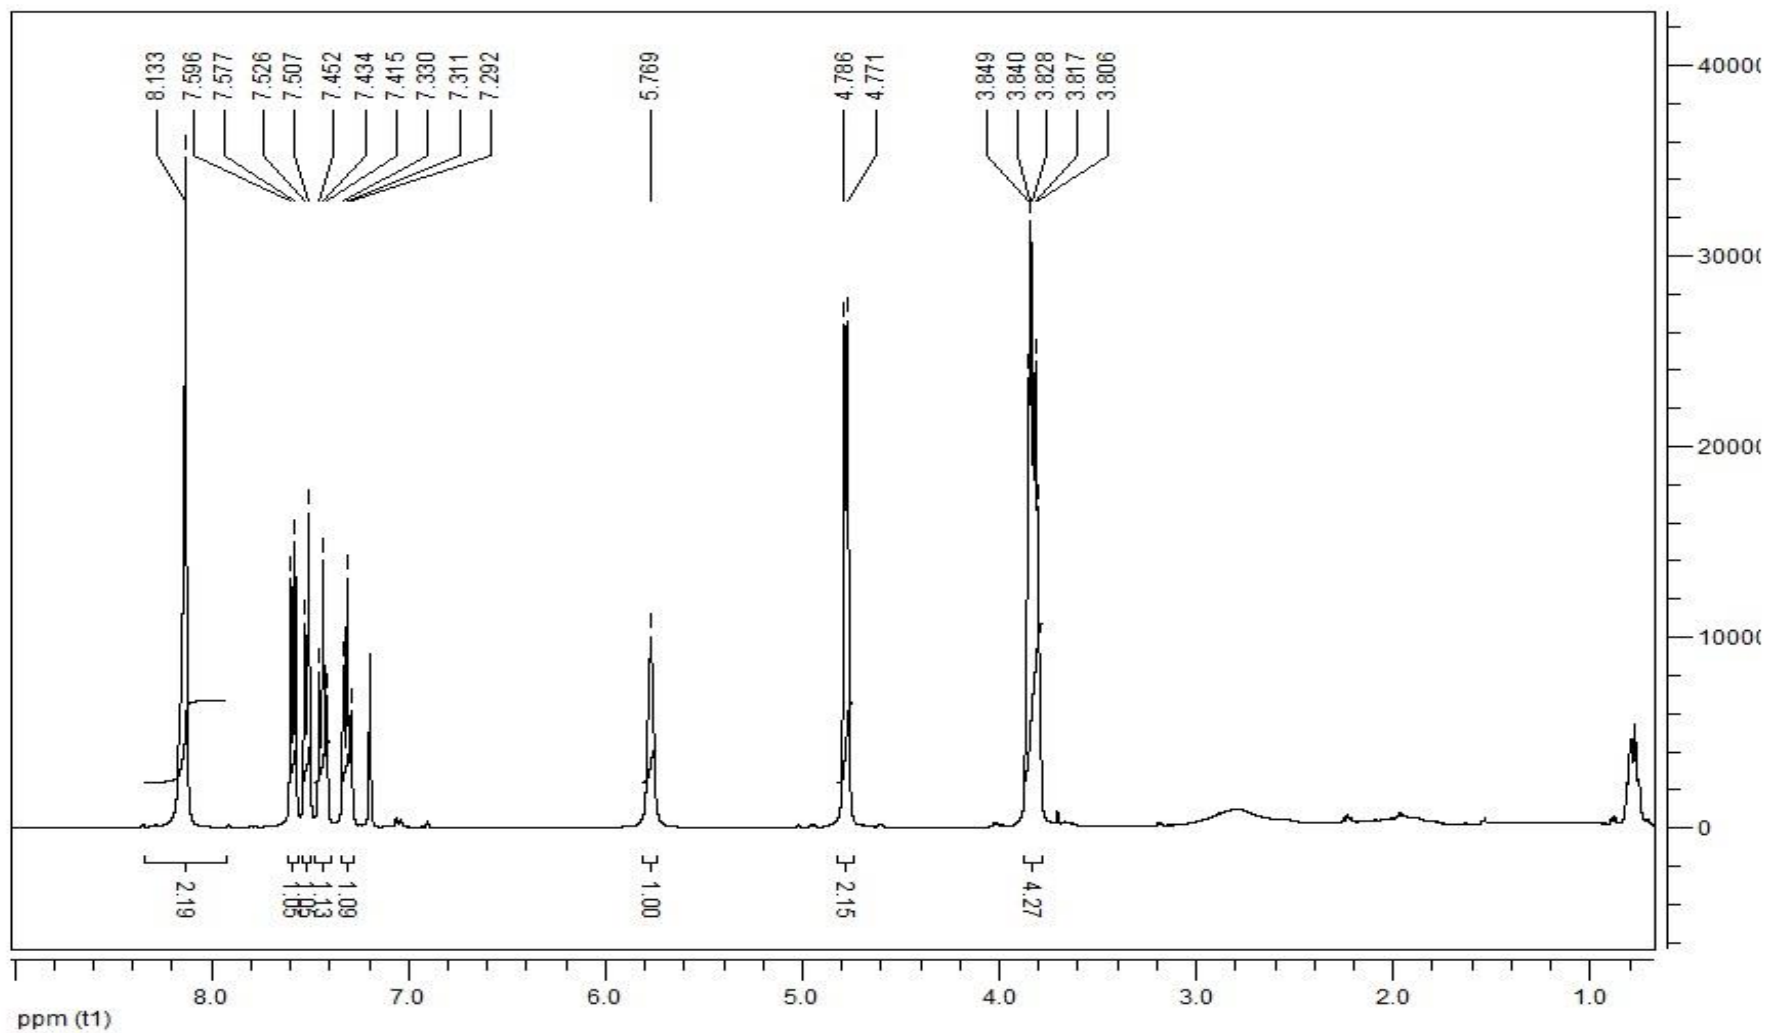

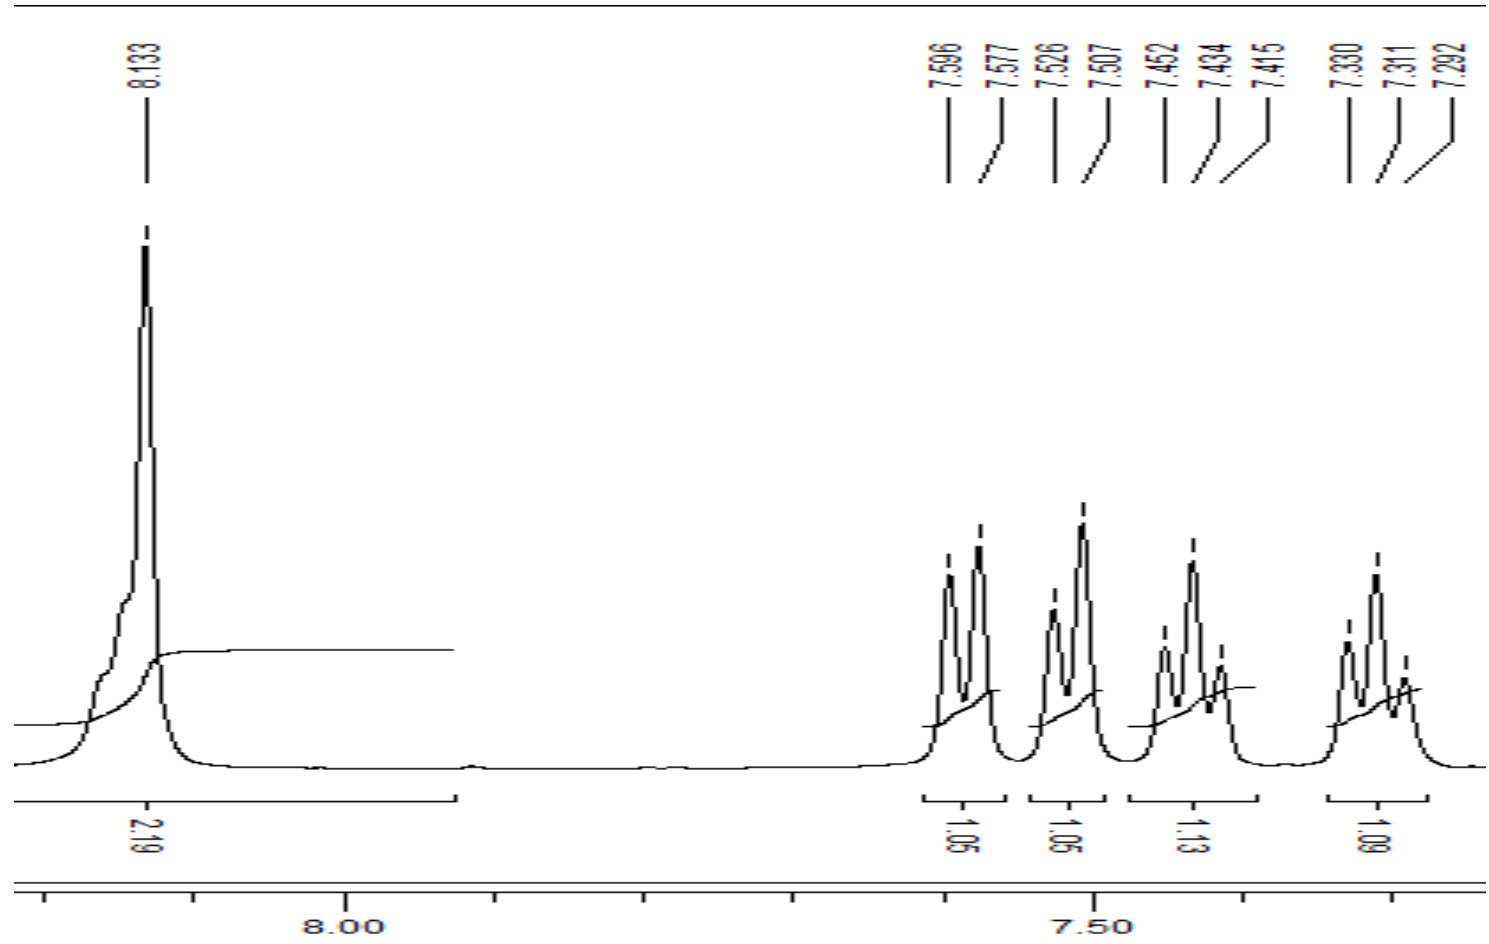

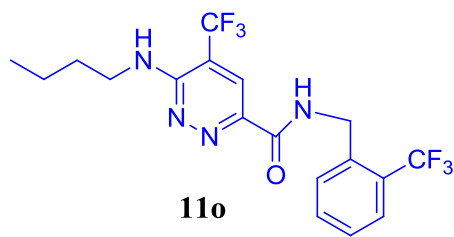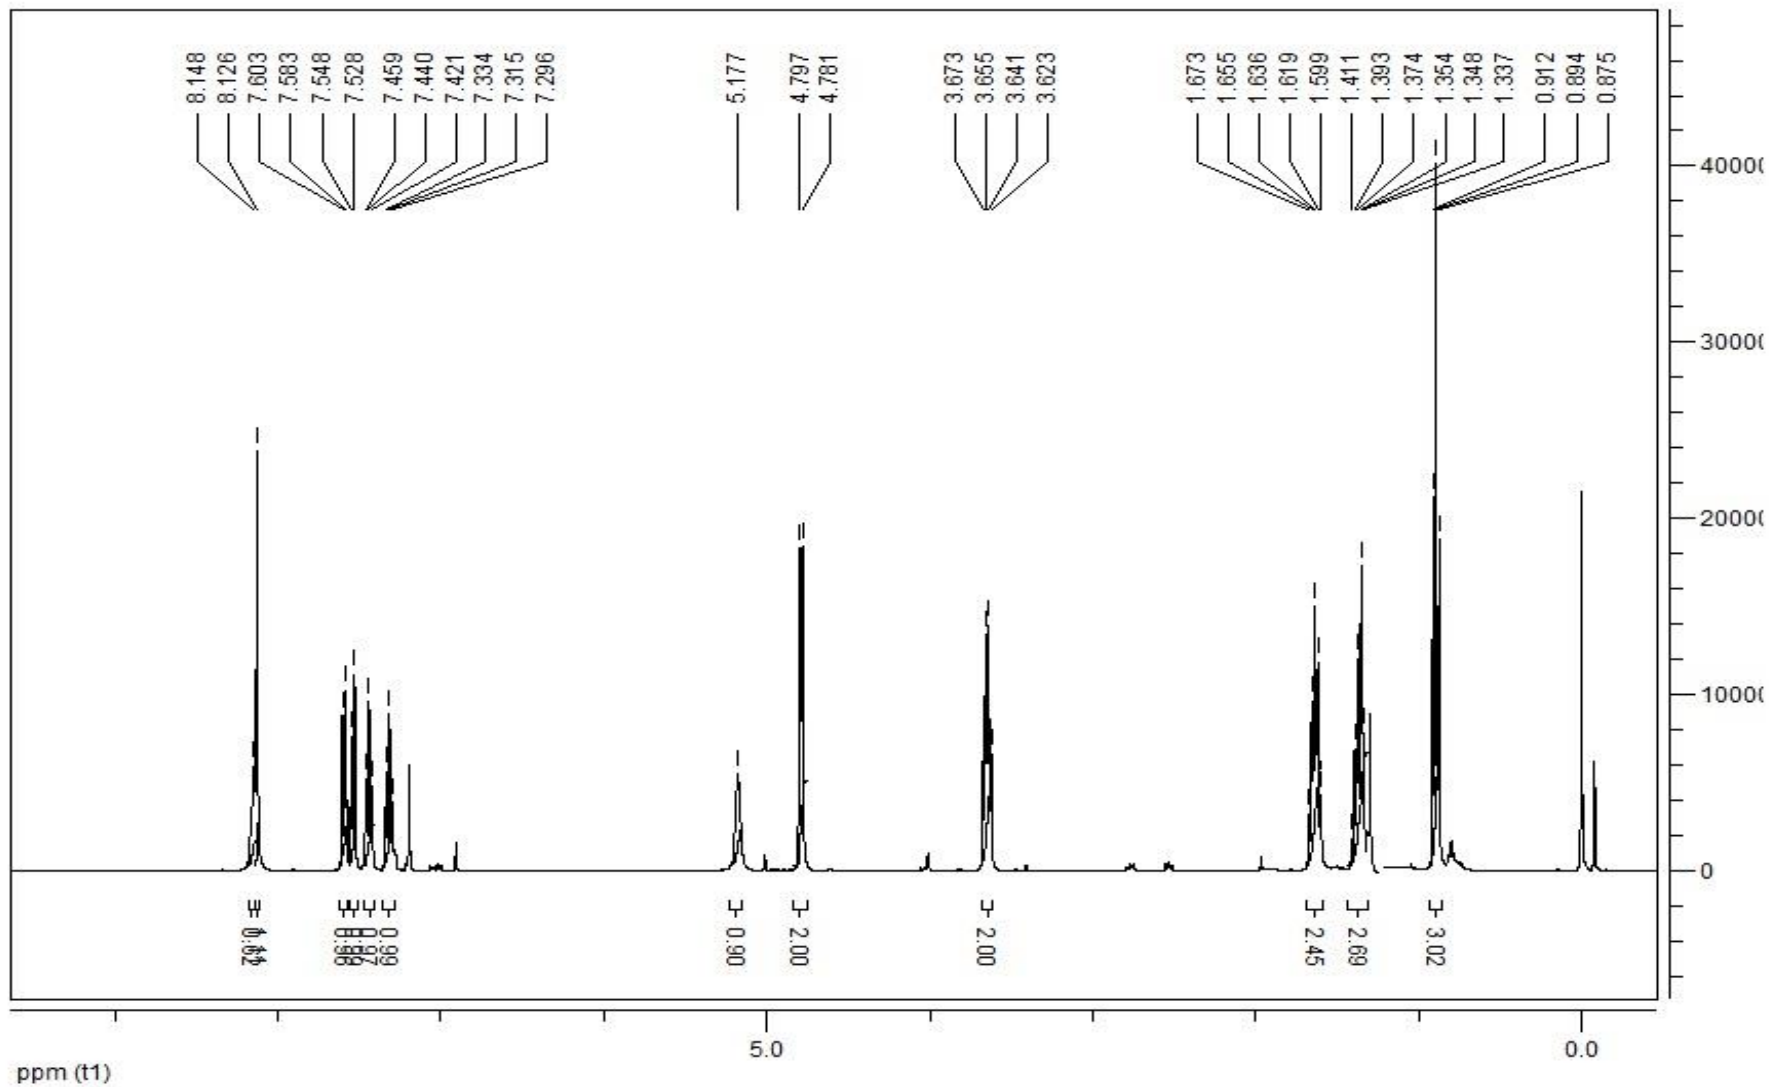

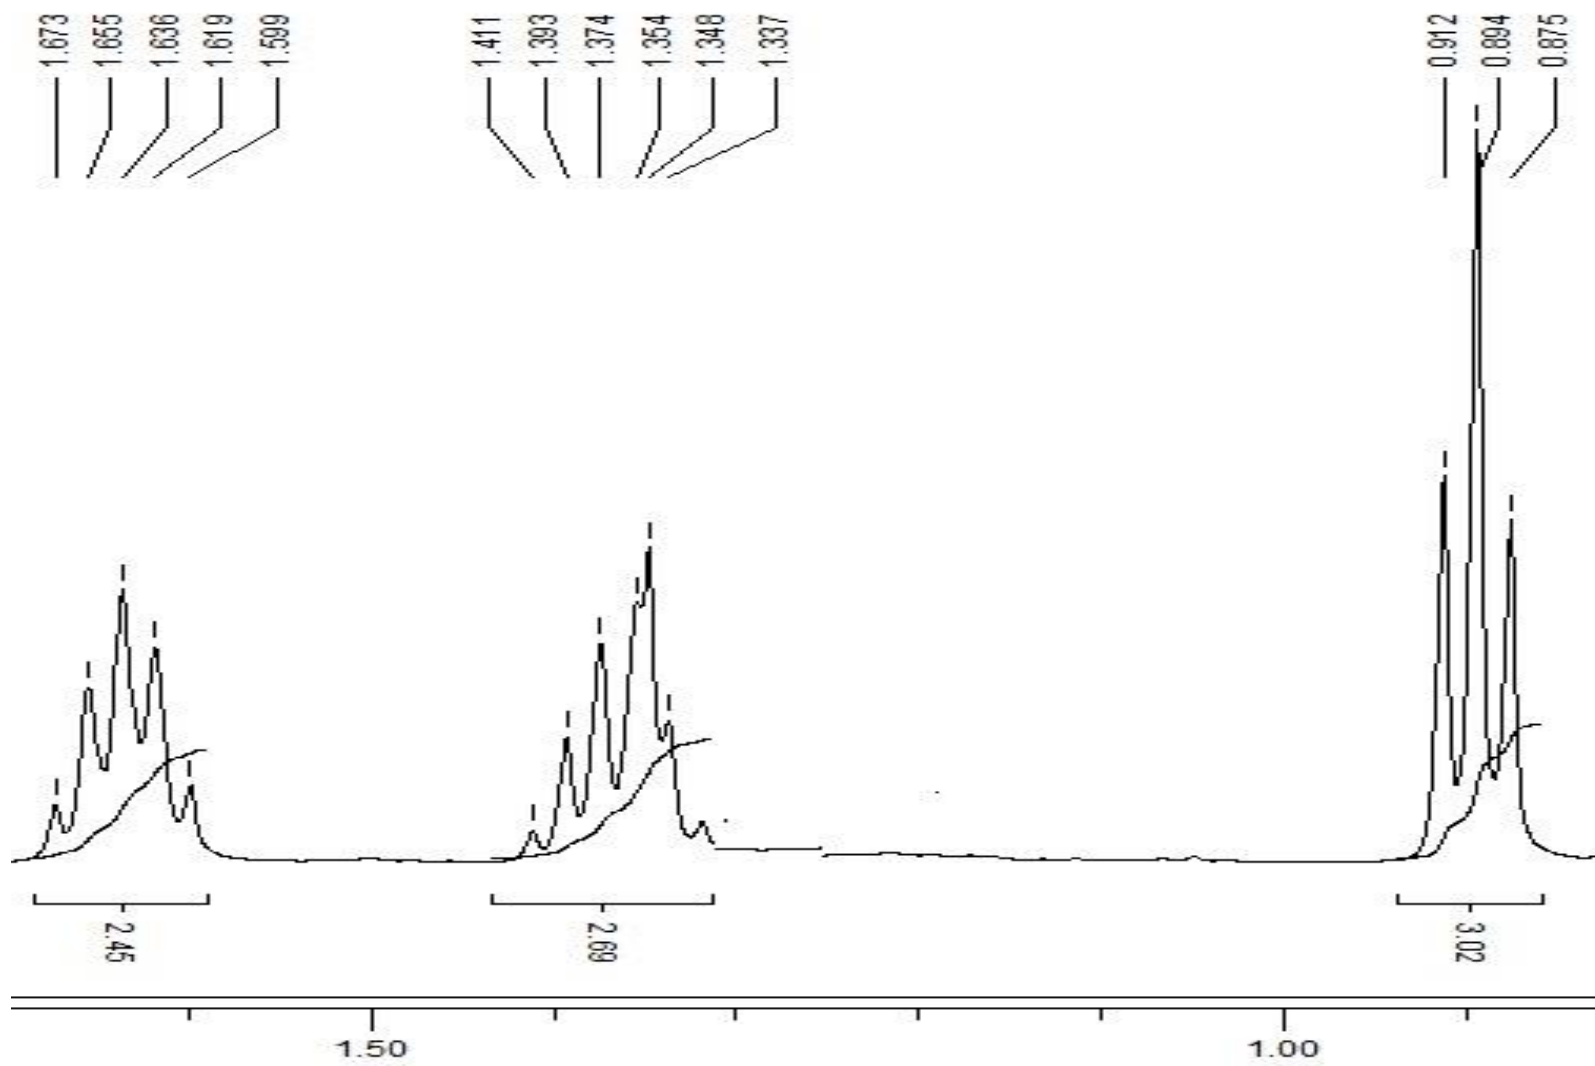

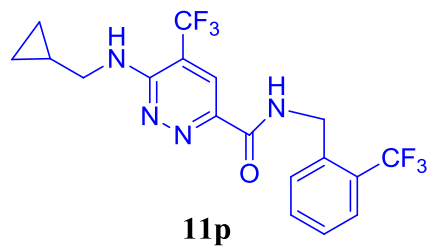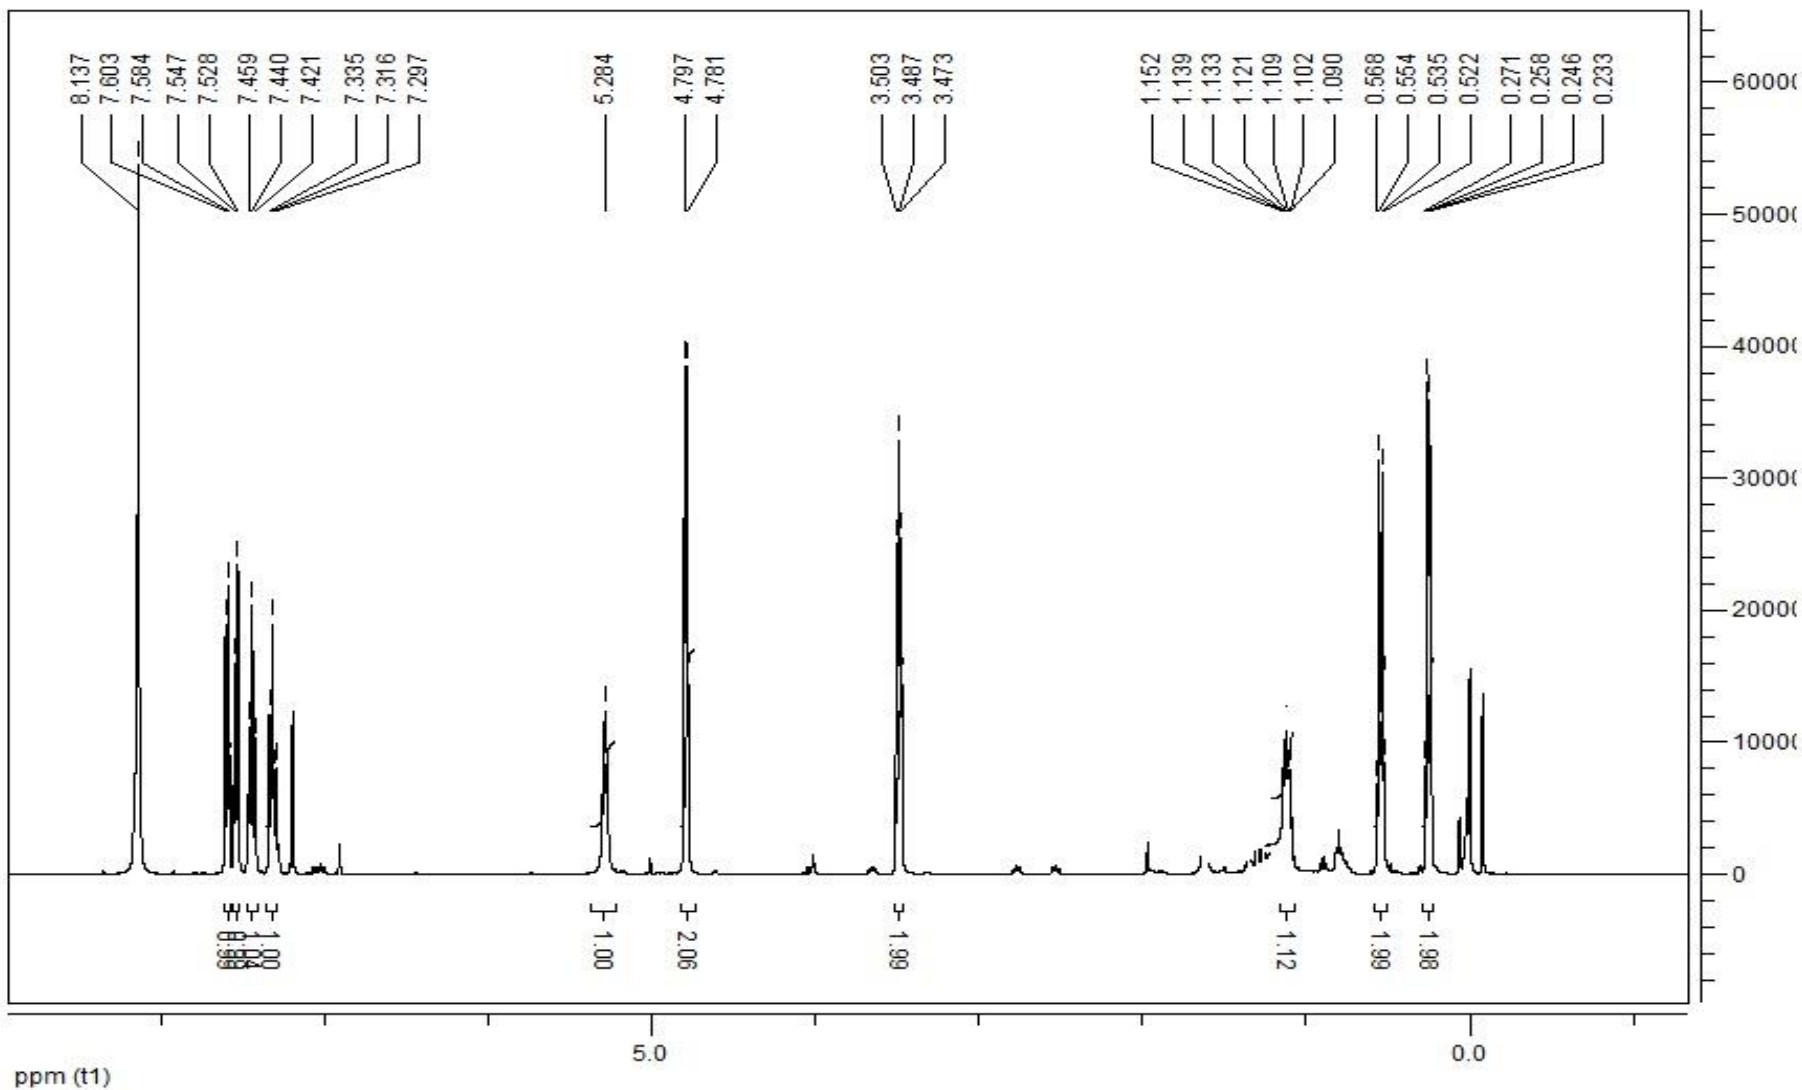

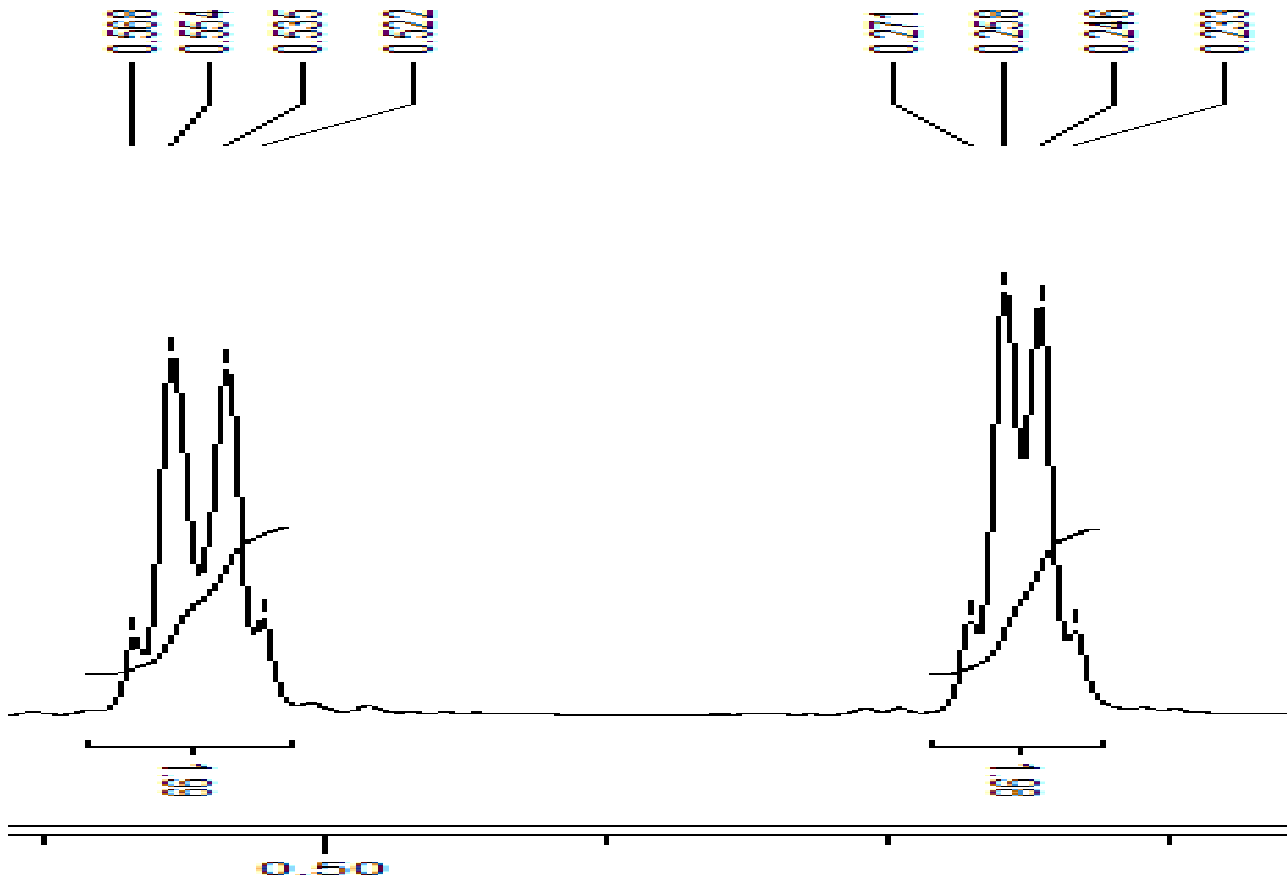



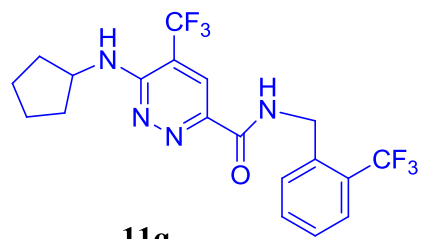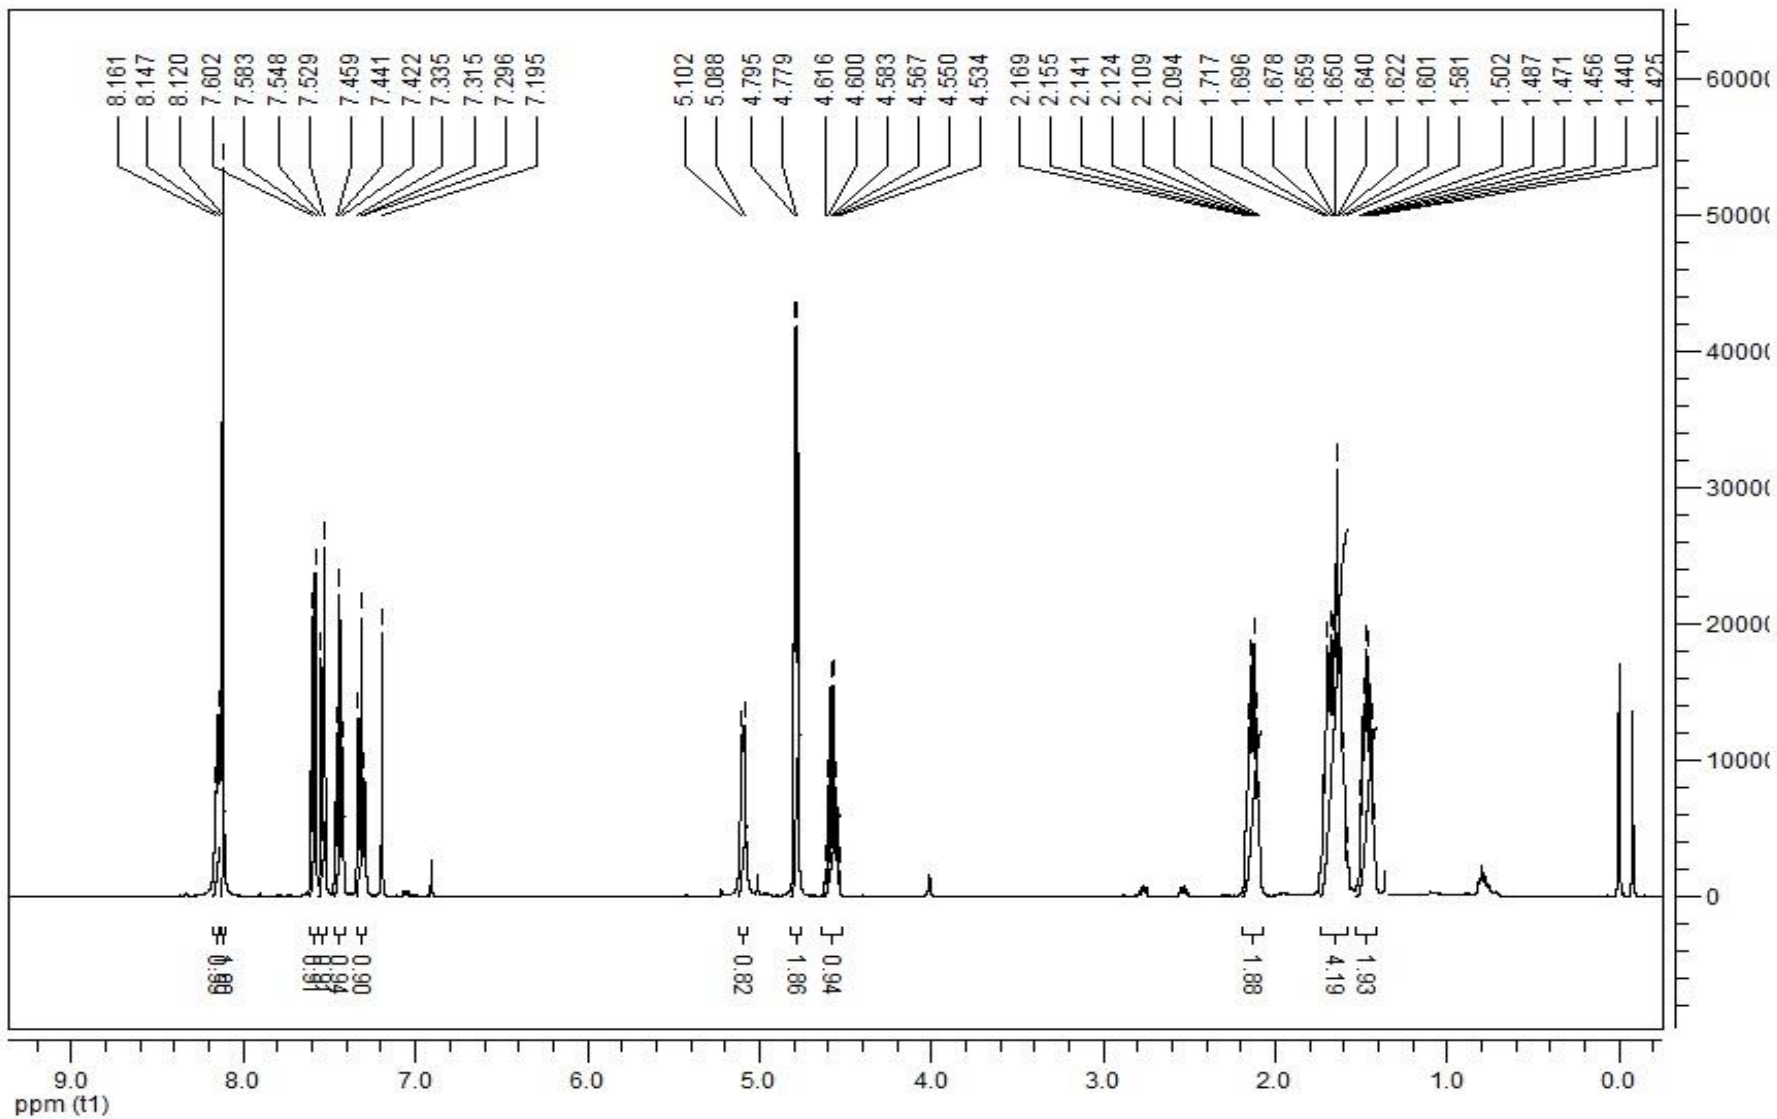

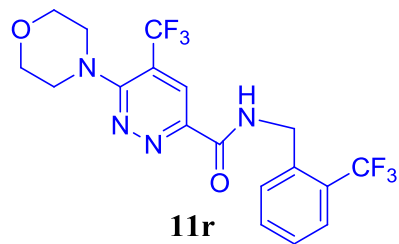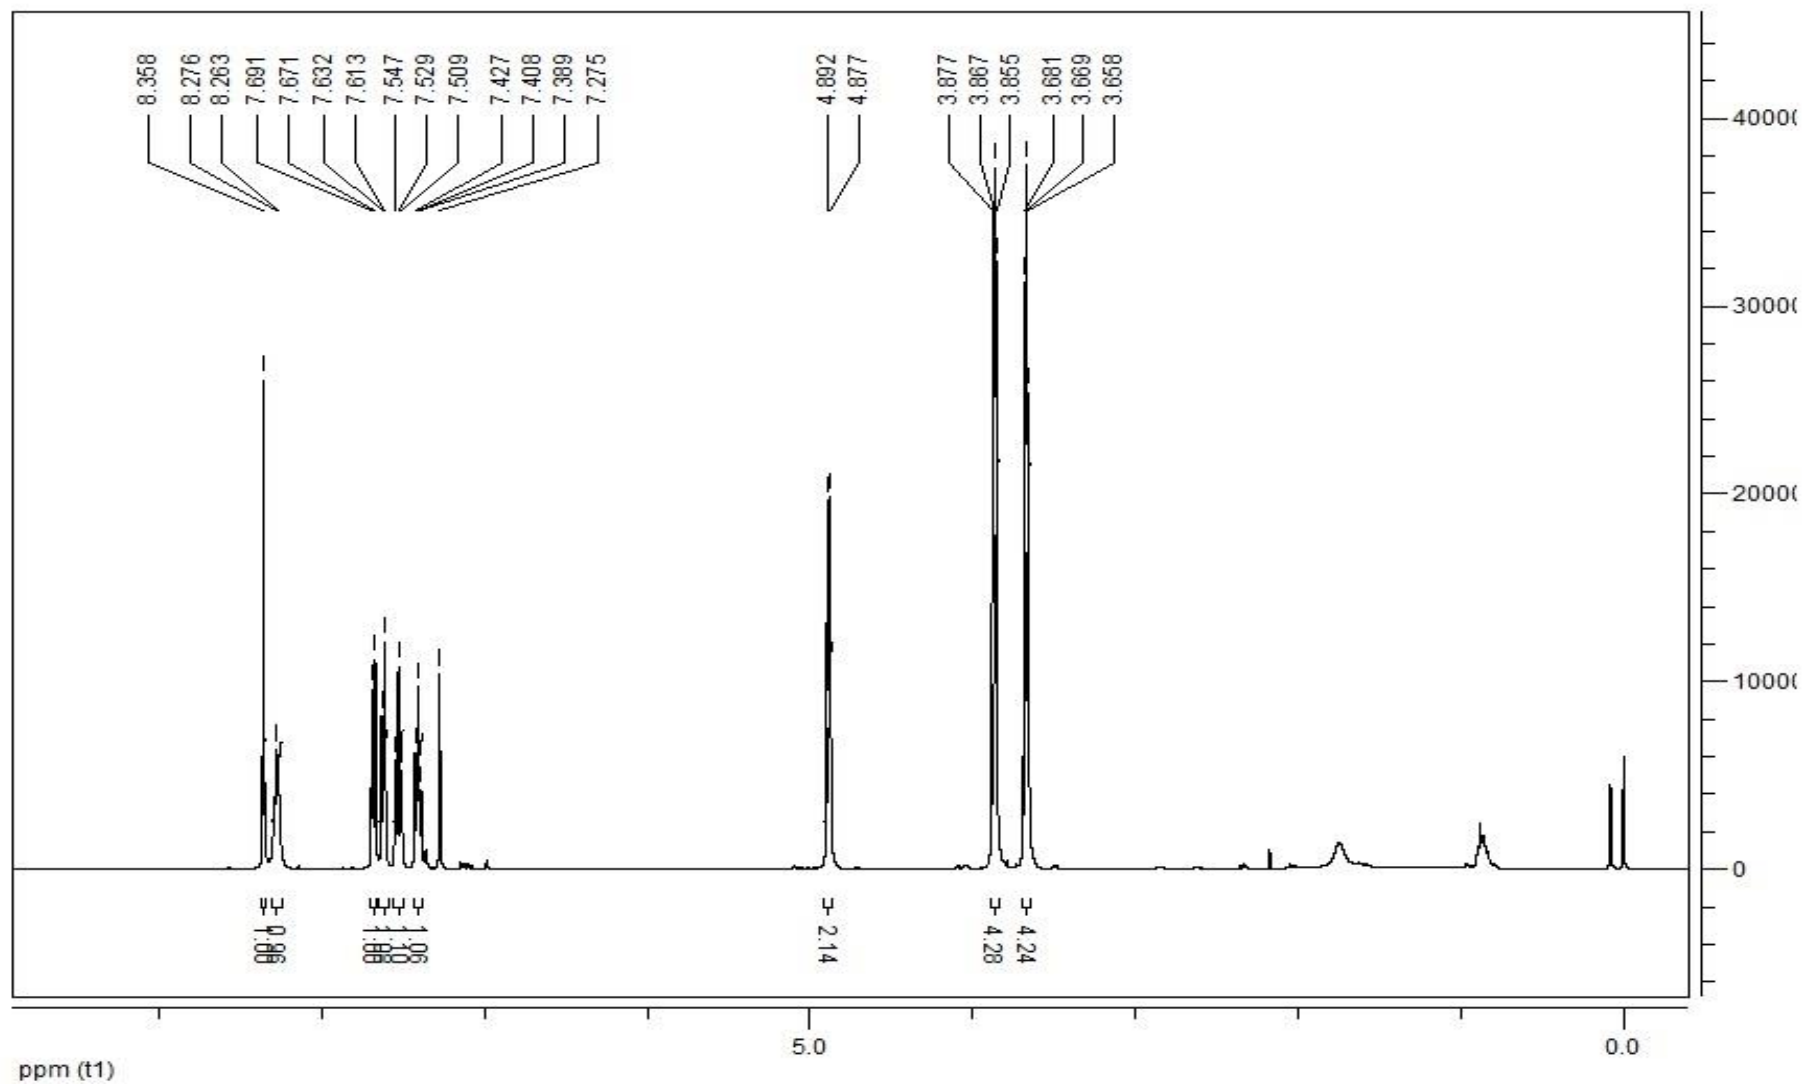

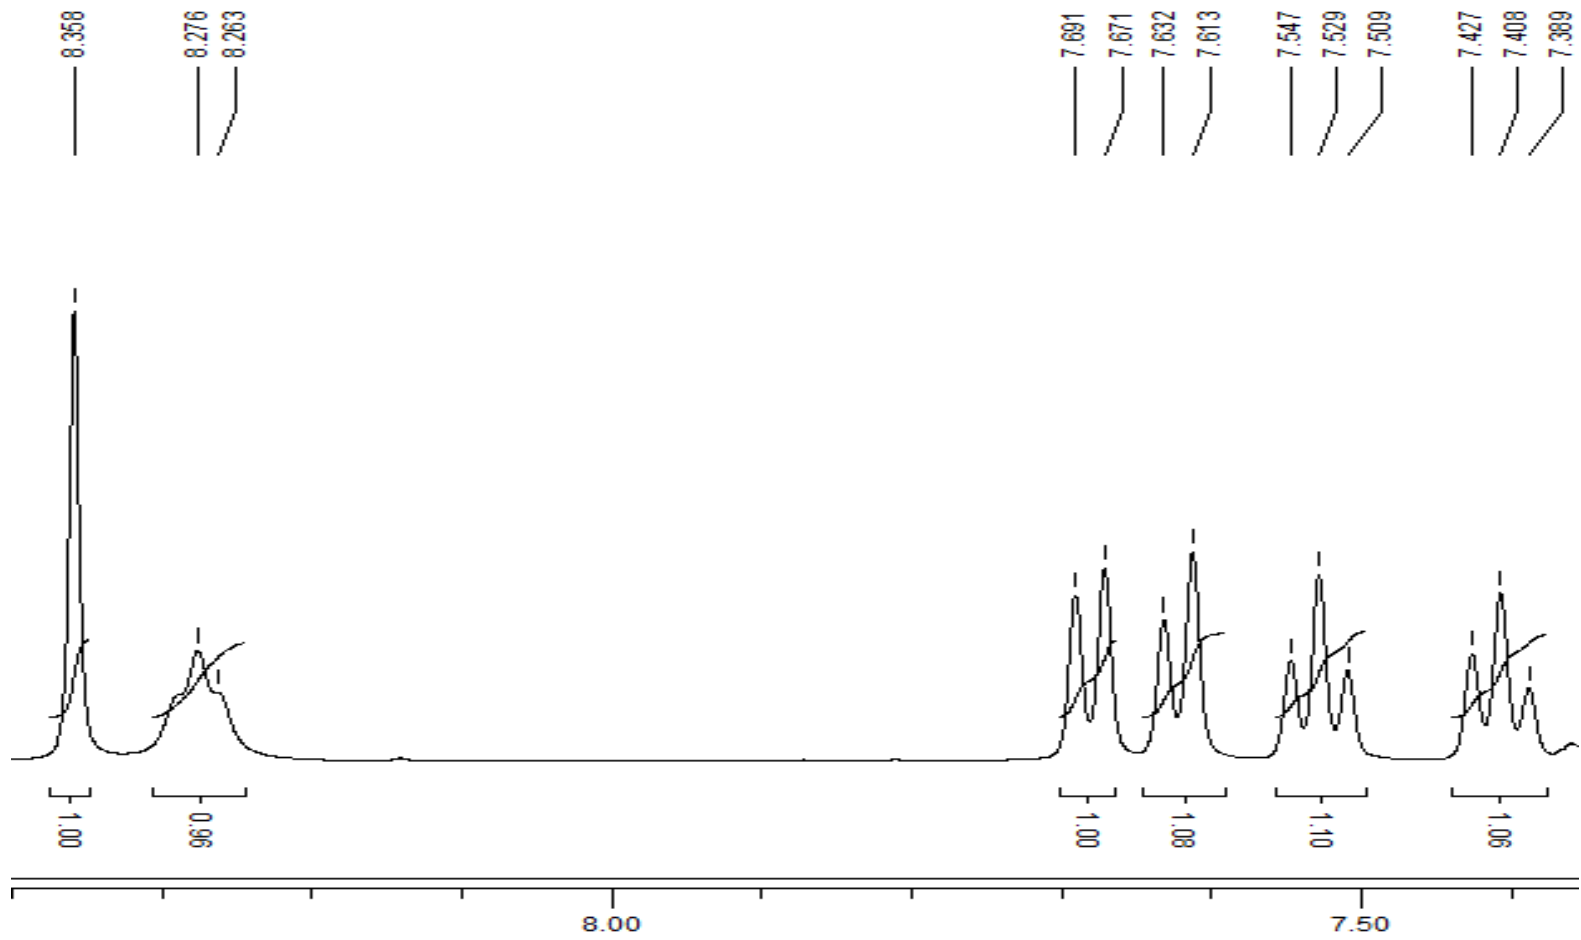

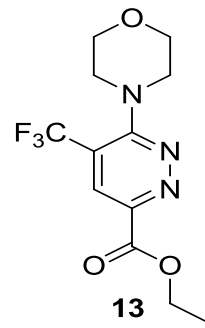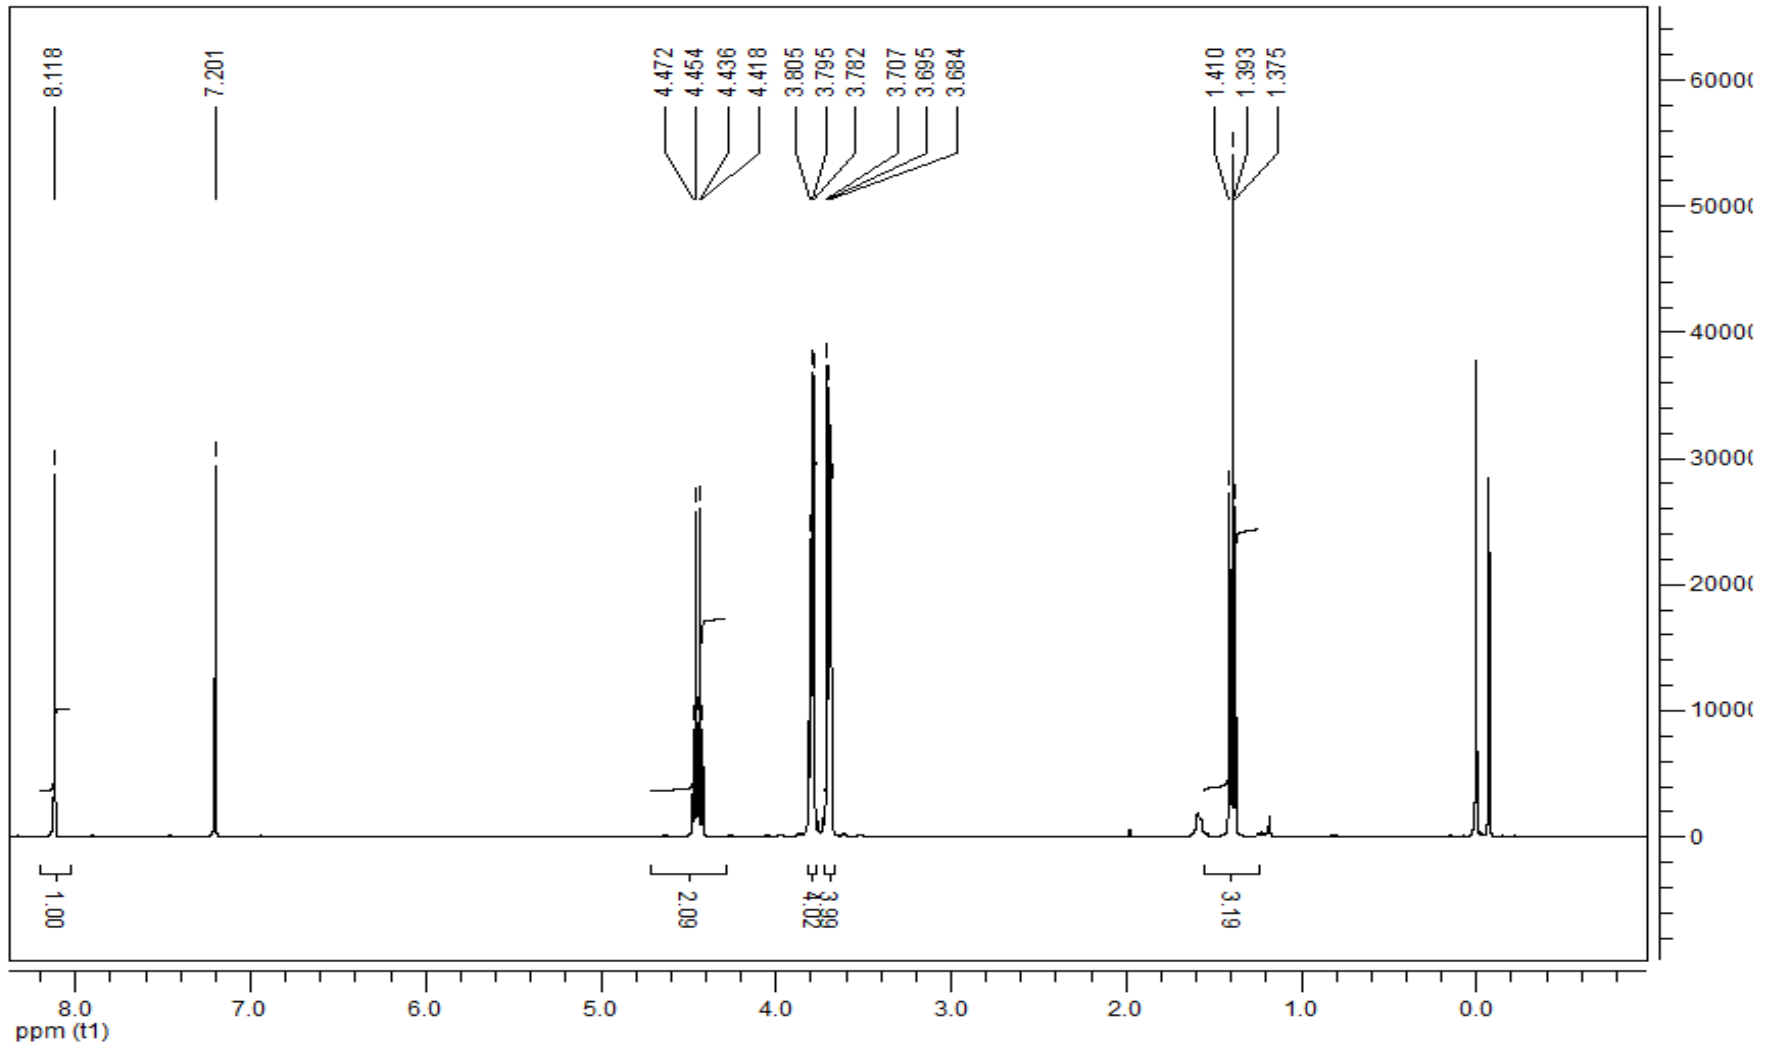

Supplement: IENZ_A_1806259_SM2316.pdf [file IENZ_A_1806259_SM2316.pdf]
